# Supplementary material
Source: PubMed Central journal article supplement (PMC3129996)
Supplement: NIHMS301784-supplement-Supplemental_Table_S2.pdf [file NIHMS301784-supplement-Supplemental_Table_S2.pdf]

**Supplementary Table S2 – MS/MS spectra of proteins identified by a single peptide match in Control *versus* ES(-) analysis**

Proteins identified by single peptide matches required identity or extensive homology, and were considered matches when the MS/MS spectrum was of good quality with matching fragment ions above baseline noise, continuity in b- or y-ion series, and fragmentation at proline residues yielding intense y-ions.

**Mascot Search Results**

**Peptide View**

MS/MS Fragmentation of **LISQIVSSITASLR**

Found in **TBAIB\_MOUSE**, Tubulin alpha-1B chain (Tubulin alpha-2 chain) (Alpha-tubulin 2) (Alpha-tubulin isotype M-alpha-2) - Mus musculus (Mouse) (P05213)

Match to Query 1650: 1486.872284 from(744.443418,2+)

Title: Arrell12290819 scan 3266 3266 (Arrell12290819.3266.3266.2.dta)

Data file Arrell12290819.mgf

Click mouse within plot area to zoom in by factor of two about that point

Or, Plot from 200 to 1500 Da **Full range**

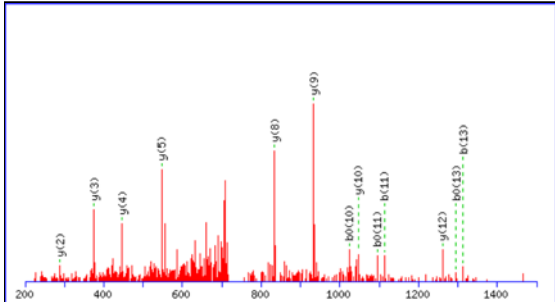

Monoisotopic mass of neutral peptide Mr(calc): 1486.8719

Ions Score: 58 Expect: 2.4e-06

Matches (Bold Red): 13/142 fragment ions using 28 most intense peaks

| #  | b                | b <sup>++</sup> | b*        | b <sup>*++</sup> | b <sup>0</sup>   | b <sup>0++</sup> | Seq.     | y                | y <sup>++</sup> | y*        | y <sup>*++</sup> | y <sup>0</sup> | y <sup>0++</sup> | #         |
|----|------------------|-----------------|-----------|------------------|------------------|------------------|----------|------------------|-----------------|-----------|------------------|----------------|------------------|-----------|
| 1  | 114.0913         | 57.5493         |           |                  |                  |                  | <b>L</b> |                  |                 |           |                  |                |                  | <b>14</b> |
| 2  | 227.1754         | 114.0913        |           |                  |                  |                  | <b>I</b> | 1374.7951        | 687.9012        | 1357.7686 | 679.3879         | 1356.7845      | 678.8959         | <b>13</b> |
| 3  | 314.2074         | 157.6074        |           |                  | 296.1969         | 148.6021         | <b>S</b> | <b>1261.7110</b> | 631.3592        | 1244.6845 | 622.8459         | 1243.7005      | 622.3539         | <b>12</b> |
| 4  | 442.2660         | 221.6366        | 425.2395  | 213.1234         | 424.2554         | 212.6314         | <b>Q</b> | 1174.6790        | 587.8431        | 1157.6525 | 579.3299         | 1156.6684      | 578.8379         | <b>11</b> |
| 5  | 555.3501         | 278.1787        | 538.3235  | 269.6654         | 537.3395         | 269.1734         | <b>I</b> | <b>1046.6204</b> | 523.8139        | 1029.5939 | 515.3006         | 1028.6099      | 514.8086         | <b>10</b> |
| 6  | 654.4185         | 327.7129        | 637.3919  | 319.1996         | 636.4079         | 318.7076         | <b>V</b> | <b>933.5364</b>  | 467.2718        | 916.5098  | 458.7585         | 915.5258       | 458.2665         | <b>9</b>  |
| 7  | 741.4505         | 371.2289        | 724.4240  | 362.7156         | 723.4400         | 362.2236         | <b>S</b> | <b>834.4680</b>  | 417.7376        | 817.4414  | 409.2243         | 816.4574       | 408.7323         | <b>8</b>  |
| 8  | 828.4825         | 414.7449        | 811.4560  | 406.2316         | 810.4720         | 405.7396         | <b>S</b> | 747.4359         | 374.2216        | 730.4094  | 365.7083         | 729.4254       | 365.2163         | <b>7</b>  |
| 9  | 941.5666         | 471.2869        | 924.5401  | 462.7737         | 923.5560         | 462.2817         | <b>I</b> | 660.4039         | 330.7056        | 643.3774  | 322.1923         | 642.3933       | 321.7003         | <b>6</b>  |
| 10 | 1042.6143        | 521.8108        | 1025.5877 | 513.2975         | <b>1024.6037</b> | 512.8055         | <b>T</b> | <b>547.3198</b>  | 274.1636        | 530.2933  | 265.6503         | 529.3093       | 265.1583         | <b>5</b>  |
| 11 | <b>1113.6514</b> | 557.3293        | 1096.6249 | 548.8161         | <b>1095.6408</b> | 548.3241         | <b>A</b> | <b>446.2722</b>  | 223.6397        | 429.2456  | 215.1264         | 428.2616       | 214.6344         | <b>4</b>  |
| 12 | 1200.6834        | 600.8454        | 1183.6569 | 592.3321         | 1182.6729        | 591.8401         | <b>S</b> | <b>375.2350</b>  | 188.1212        | 358.2085  | 179.6079         | 357.2245       | 179.1159         | <b>3</b>  |
| 13 | <b>1313.7675</b> | 657.3874        | 1296.7409 | 648.8741         | <b>1295.7569</b> | 648.3821         | <b>L</b> | <b>288.2030</b>  | 144.6051        | 271.1765  | 136.0919         |                |                  | <b>2</b>  |
| 14 |                  |                 |           |                  |                  |                  | <b>R</b> | 175.1190         | 88.0631         | 158.0924  | 79.5498          |                |                  | <b>1</b>  |

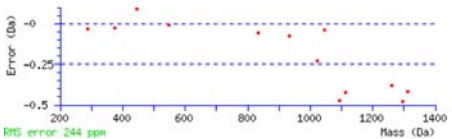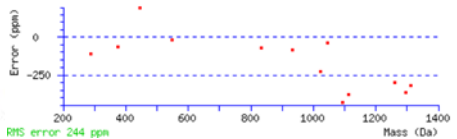

NCBI BLAST search of [LISQIVSSITASLR](#)

(Parameters: blastp, nr protein database, expect=20000, no filter, PAM30)

Other BLAST [web gateways](#)

All matches to this query

| Score | Mr(calc): | Delta  | Sequence                       |
|-------|-----------|--------|--------------------------------|
| 57.8  | 1486.8719 | 0.0004 | <a href="#">LISQIVSSITASLR</a> |

Mascot: <http://www.matrixscience.com/>

**Mascot Search Results**

**Peptide View**

MS/MS Fragmentation of **LGANSLDLVVFGFR**

Found in **DHSA\_MOUSE**, Succinate dehydrogenase [ubiquinone] flavoprotein subunit, mitochondrial precursor (EC 1.3.5.1) (Fp) (Flavoprotein subunit of complex II) - Mus musculus (Mouse) (Q8K2B3)

Match to Query 781: 1472.837924 from(737.426238,2+)

Title: Arrell12290802\_scan\_2107\_2109 (Arrell12290802.2107.2109.2.dta)

Data file Arrell12290802.mgf

Click mouse within plot area to zoom in by factor of two about that point

Or, Plot from 200 to 1500 Da Full range

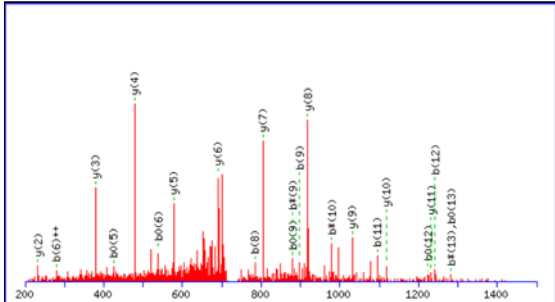

Monoisotopic mass of neutral peptide Mr(calc): 1472.8351

Ions Score: 64 Expect: 4.9e-06

Matches (Bold Red): 23/130 fragment ions using 46 most intense peaks

| #  | b                | b <sup>++</sup> | b*               | b* <sup>++</sup> | b <sup>0</sup>   | b <sup>0</sup> <sup>++</sup> | Seq. | y                | y <sup>++</sup> | y*        | y* <sup>++</sup> | y <sup>0</sup> | y <sup>0</sup> <sup>++</sup> | #  |
|----|------------------|-----------------|------------------|------------------|------------------|------------------------------|------|------------------|-----------------|-----------|------------------|----------------|------------------------------|----|
| 1  | 114.0913         | 57.5493         |                  |                  |                  |                              | L    |                  |                 |           |                  |                |                              | 14 |
| 2  | 171.1128         | 86.0600         |                  |                  |                  |                              | G    | 1360.7583        | 680.8828        | 1343.7318 | 672.3695         | 1342.7478      | 671.8775                     | 13 |
| 3  | 242.1499         | 121.5786        |                  |                  |                  |                              | A    | 1303.7369        | 652.3721        | 1286.7103 | 643.8588         | 1285.7263      | 643.3668                     | 12 |
| 4  | 356.1928         | 178.6001        | 339.1663         | 170.0868         |                  |                              | N    | <b>1232.6997</b> | 616.8535        | 1215.6732 | 608.3402         | 1214.6892      | 607.8482                     | 11 |
| 5  | 443.2249         | 222.1161        | 426.1983         | 213.6028         | <b>425.2143</b>  | 213.1108                     | S    | <b>1118.6568</b> | 559.8320        | 1101.6303 | 551.3188         | 1100.6463      | 550.8268                     | 10 |
| 6  | 556.3089         | <b>278.6581</b> | 539.2824         | 270.1448         | <b>538.2984</b>  | 269.6528                     | L    | <b>1031.6248</b> | 516.3160        | 1014.5982 | 507.8028         | 1013.6142      | 507.3108                     | 9  |
| 7  | 669.3930         | 335.2001        | 652.3665         | 326.6869         | 651.3824         | 326.1949                     | L    | <b>918.5407</b>  | 459.7740        | 901.5142  | 451.2607         | 900.5302       | 450.7687                     | 8  |
| 8  | <b>784.4199</b>  | 392.7136        | 767.3934         | 384.2003         | 766.4094         | 383.7083                     | D    | <b>805.4567</b>  | 403.2320        | 788.4301  | 394.7187         | 787.4461       | 394.2267                     | 7  |
| 9  | <b>897.5040</b>  | 449.2556        | <b>880.4775</b>  | 440.7424         | <b>879.4934</b>  | 440.2504                     | L    | <b>690.4297</b>  | 345.7185        | 673.4032  | 337.2052         |                |                              | 6  |
| 10 | 996.5724         | 498.7898        | <b>979.5459</b>  | 490.2766         | 978.5619         | 489.7846                     | V    | <b>577.3457</b>  | 289.1765        | 560.3191  | 280.6632         |                |                              | 5  |
| 11 | <b>1095.6408</b> | 548.3241        | 1078.6143        | 539.8108         | 1077.6303        | 539.3188                     | V    | <b>478.2772</b>  | 239.6423        | 461.2507  | 231.1290         |                |                              | 4  |
| 12 | <b>1242.7093</b> | 621.8583        | 1225.6827        | 613.3450         | <b>1224.6987</b> | 612.8530                     | F    | <b>379.2088</b>  | 190.1081        | 362.1823  | 181.5948         |                |                              | 3  |
| 13 | 1299.7307        | 650.3690        | <b>1282.7042</b> | 641.8557         | <b>1281.7201</b> | 641.3637                     | G    | <b>232.1404</b>  | 116.5738        | 215.1139  | 108.0606         |                |                              | 2  |
| 14 |                  |                 |                  |                  |                  |                              | R    | 175.1190         | 88.0631         | 158.0924  | 79.5498          |                |                              | 1  |

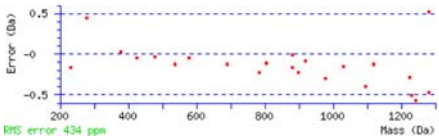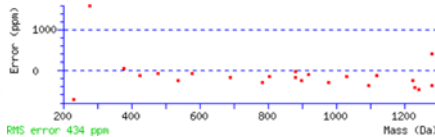

NCBI BLAST search of [LGANSLDLVVFGFR](#)

(Parameters: blastp, nr protein database, expect=20000, no filter, PAM30)

Other BLAST [web gateways](#)

All matches to this query

| Score | Mr(calc): | Delta  | Sequence                       |
|-------|-----------|--------|--------------------------------|
| 63.8  | 1472.8351 | 0.0028 | <a href="#">LGANSLDLVVFGFR</a> |

Mascot: <http://www.matrixscience.com/>

**Mascot Search Results**

**Peptide View**

MS/MS Fragmentation of **VQQTVDLFG**R

Found in **GRP75\_MOUSE**, Stress-70 protein, mitochondrial precursor (75 kDa glucose-regulated protein) (GRP 75) (Heat shock 70 kDa protein 9) (Peptide-binding protein 74) (PBP74) (P66 MOT) (Mortalin) - Mus musculus (Mouse) (P38647)

Match to Query 716: 1289.674044 from(645.844298,2+)

Title: Arrell12290802\_scan\_1212\_1214 (Arrell12290802.1212.1214.2.dta)

Data file Arrell12290802.mgf

Click mouse within plot area to zoom in by factor of two about that point

Or, Plot from 100 to 1300 Da

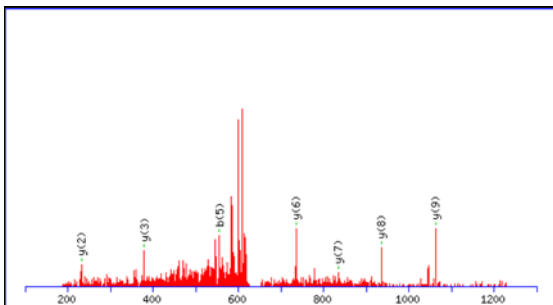

Monoisotopic mass of neutral peptide Mr(calc): 1289.6728

Ions Score: 33 Expect: 0.0047

Matches (Bold Red): 7/104 fragment ions using 22 most intense peaks

| #  | b               | b <sup>++</sup> | b*        | b <sup>*++</sup> | b <sup>0</sup> | b <sup>0++</sup> | Seq. | y                | y <sup>++</sup> | y*        | y <sup>*++</sup> | y <sup>0</sup> | y <sup>0++</sup> | #  |
|----|-----------------|-----------------|-----------|------------------|----------------|------------------|------|------------------|-----------------|-----------|------------------|----------------|------------------|----|
| 1  | 100.0757        | 50.5415         |           |                  |                |                  | V    |                  |                 |           |                  |                |                  | 11 |
| 2  | 228.1343        | 114.5708        | 211.1077  | 106.0575         |                |                  | Q    | 1191.6117        | 596.3095        | 1174.5851 | 587.7962         | 1173.6011      | 587.3042         | 10 |
| 3  | 356.1928        | 178.6001        | 339.1663  | 170.0868         |                |                  | Q    | <b>1063.5531</b> | 532.2802        | 1046.5265 | 523.7669         | 1045.5425      | 523.2749         | 9  |
| 4  | 457.2405        | 229.1239        | 440.2140  | 220.6106         | 439.2300       | 220.1186         | T    | <b>935.4945</b>  | 468.2509        | 918.4680  | 459.7376         | 917.4839       | 459.2456         | 8  |
| 5  | <b>556.3089</b> | 278.6581        | 539.2824  | 270.1448         | 538.2984       | 269.6528         | V    | <b>834.4468</b>  | 417.7271        | 817.4203  | 409.2138         | 816.4363       | 408.7218         | 7  |
| 6  | 684.3675        | 342.6874        | 667.3410  | 334.1741         | 666.3570       | 333.6821         | Q    | <b>735.3784</b>  | 368.1928        | 718.3519  | 359.6796         | 717.3678       | 359.1876         | 6  |
| 7  | 799.3945        | 400.2009        | 782.3679  | 391.6876         | 781.3839       | 391.1956         | D    | 607.3198         | 304.1636        | 590.2933  | 295.6503         | 589.3093       | 295.1583         | 5  |
| 8  | 912.4785        | 456.7429        | 895.4520  | 448.2296         | 894.4680       | 447.7376         | L    | 492.2929         | 246.6501        | 475.2663  | 238.1368         |                |                  | 4  |
| 9  | 1059.5469       | 530.2771        | 1042.5204 | 521.7638         | 1041.5364      | 521.2718         | F    | <b>379.2088</b>  | 190.1081        | 362.1823  | 181.5948         |                |                  | 3  |
| 10 | 1116.5684       | 558.7878        | 1099.5419 | 550.2746         | 1098.5578      | 549.7826         | G    | <b>232.1404</b>  | 116.5738        | 215.1139  | 108.0606         |                |                  | 2  |
| 11 |                 |                 |           |                  |                |                  | R    | 175.1190         | 88.0631         | 158.0924  | 79.5498          |                |                  | 1  |

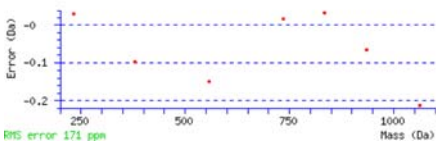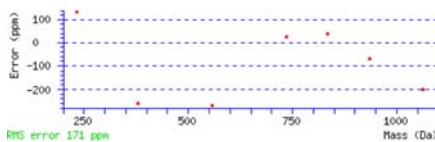

NCBI BLAST search of **VQQTVDLFG**R

(Parameters: blastp, nr protein database, expect=20000, no filter, PAM30)

Other BLAST [web gateways](#)

All matches to this query

| Score | Mr(calc): | Delta  | Sequence                    |
|-------|-----------|--------|-----------------------------|
| 33.4  | 1289.6728 | 0.0012 | <a href="#">VQQTVDLFG</a> R |

Mascot: <http://www.matrixscience.com/>

**Mascot Search Results**

**Peptide View**

MS/MS Fragmentation of **VVLNSRPGK**

Found in **ZADH1\_MOUSE**, Zinc-binding alcohol dehydrogenase domain-containing protein 1 (EC 1.-.-.-) - Mus musculus (Mouse) (Q8VDQ1)

Match to Query 352: 968.575904 from(485.295228,2+)

Title: Arrell12290833 scan 348 348 (Arrell12290833.348.348.2.dta)

Data file Arrell12290833.mgf

Click mouse within plot area to zoom in by factor of two about that point

Or, Plot from 100 to 1000 Da **Full range**

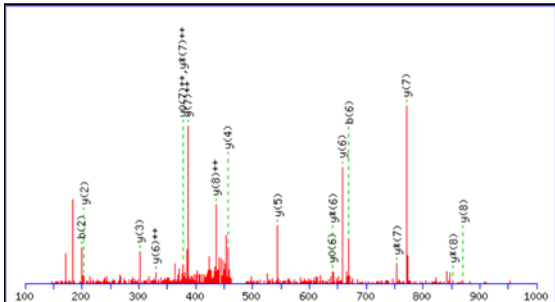

Monoisotopic mass of neutral peptide Mr(calc): 968.5767

Ions Score: 43 Expect: 0.00015

Matches (Bold Red): 18/74 fragment ions using 39 most intense peaks

| # | b               | b <sup>++</sup> | b*       | b <sup>+++</sup> | b <sup>0</sup> | b <sup>0++</sup> | Seq. | y               | y <sup>++</sup> | y*              | y <sup>+++</sup> | y <sup>0</sup>  | y <sup>0++</sup> | # |
|---|-----------------|-----------------|----------|------------------|----------------|------------------|------|-----------------|-----------------|-----------------|------------------|-----------------|------------------|---|
| 1 | 100.0757        | 50.5415         |          |                  |                |                  | V    |                 |                 |                 |                  |                 |                  | 9 |
| 2 | <b>199.1441</b> | 100.0757        |          |                  |                |                  | V    | <b>870.5156</b> | <b>435.7614</b> | <b>853.4890</b> | 427.2482         | 852.5050        | 426.7561         | 8 |
| 3 | 312.2282        | 156.6177        |          |                  |                |                  | L    | <b>771.4472</b> | <b>386.2272</b> | <b>754.4206</b> | <b>377.7139</b>  | 753.4366        | <b>377.2219</b>  | 7 |
| 4 | 426.2711        | 213.6392        | 409.2445 | 205.1259         |                |                  | N    | <b>658.3631</b> | <b>329.6852</b> | <b>641.3365</b> | 321.1719         | <b>640.3525</b> | 320.6799         | 6 |
| 5 | 513.3031        | 257.1552        | 496.2766 | 248.6419         | 495.2926       | 248.1499         | S    | <b>544.3202</b> | 272.6637        | 527.2936        | 264.1504         | 526.3096        | 263.6584         | 5 |
| 6 | <b>669.4042</b> | 335.2058        | 652.3777 | 326.6925         | 651.3937       | 326.2005         | R    | <b>457.2881</b> | 229.1477        | 440.2616        | 220.6344         |                 |                  | 4 |
| 7 | 766.4570        | 383.7321        | 749.4304 | 375.2189         | 748.4464       | 374.7269         | P    | <b>301.1870</b> | 151.0972        | 284.1605        | 142.5839         |                 |                  | 3 |
| 8 | 823.4785        | 412.2429        | 806.4519 | 403.7296         | 805.4679       | 403.2376         | G    | <b>204.1343</b> | 102.5708        | 187.1077        | 94.0575          |                 |                  | 2 |
| 9 |                 |                 |          |                  |                |                  | K    | 147.1128        | 74.0600         | 130.0863        | 65.5468          |                 |                  | 1 |

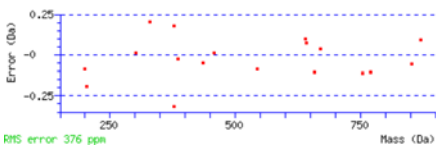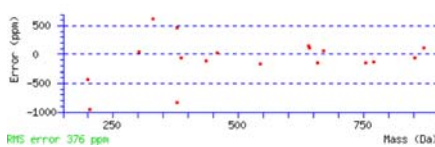

NCBI BLAST search of **VVLNSRPGK**

(Parameters: blastp, nr protein database, expect=20000, no filter, PAM30)

Other BLAST [web gateways](#)

All matches to this query

| Score | Mr(calc): | Delta   | Sequence                  |
|-------|-----------|---------|---------------------------|
| 43.4  | 968.5767  | -0.0008 | <a href="#">VVLNSRPGK</a> |
| 1.1   | 968.5767  | -0.0008 | <a href="#">RLSPVSLR</a>  |

Mascot: <http://www.matrixscience.com/>

**(MATRIX) (SCIENCE) Mascot Search Results**

**Peptide View**

MS/MS Fragmentation of **ALGVLAQLIWSR**  
 Found in **CISY\_MOUSE**, Citrate synthase, mitochondrial precursor (EC 2.3.3.1) - Mus musculus (Mouse) (Q9CZU6)

Match to Query 916: 1325.782994 from(663.898773,2+)  
 Title: Arrell12300839 scan 2285 2287 (Arrell12300839.2285.2287.2.dta)  
 Data file Arrell12300839.mgf

Click mouse within plot area to zoom in by factor of two about that point  
 Or, Plot from 100 to 1300 Da Full range

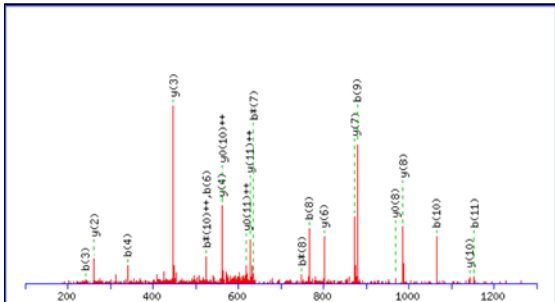

Monoisotopic mass of neutral peptide Mr(calc): 1325.7819  
 Ions Score: 51 Expect: 2.1e-05  
 Matches (Bold Red): 21/98 fragment ions using 41 most intense peaks

| #  | b                | b <sup>++</sup> | b*              | b <sup>*++</sup> | b <sup>0</sup> | b <sup>0++</sup> | Seq. | y                | y <sup>++</sup> | y*        | y <sup>*++</sup> | y <sup>0</sup>  | y <sup>0++</sup> | #  |
|----|------------------|-----------------|-----------------|------------------|----------------|------------------|------|------------------|-----------------|-----------|------------------|-----------------|------------------|----|
| 1  | 72.0444          | 36.5258         |                 |                  |                |                  | A    |                  |                 |           |                  |                 |                  | 12 |
| 2  | 185.1285         | 93.0679         |                 |                  |                |                  | L    | 1255.7521        | <b>628.3797</b> | 1238.7256 | 619.8664         | 1237.7416       | <b>619.3744</b>  | 11 |
| 3  | <b>242.1499</b>  | 121.5786        |                 |                  |                |                  | G    | <b>1142.6681</b> | 571.8377        | 1125.6415 | 563.3244         | 1124.6575       | <b>562.8324</b>  | 10 |
| 4  | <b>341.2183</b>  | 171.1128        |                 |                  |                |                  | V    | 1085.6466        | 543.3269        | 1068.6200 | 534.8137         | 1067.6360       | 534.3217         | 9  |
| 5  | 454.3024         | 227.6548        |                 |                  |                |                  | L    | <b>986.5782</b>  | 493.7927        | 969.5516  | 485.2795         | <b>968.5676</b> | 484.7874         | 8  |
| 6  | <b>525.3395</b>  | 263.1734        |                 |                  |                |                  | A    | <b>873.4941</b>  | 437.2507        | 856.4676  | 428.7374         | 855.4835        | 428.2454         | 7  |
| 7  | 653.3981         | 327.2027        | <b>636.3715</b> | 318.6894         |                |                  | Q    | <b>802.4570</b>  | 401.7321        | 785.4305  | 393.2189         | 784.4464        | 392.7269         | 6  |
| 8  | <b>766.4822</b>  | 383.7447        | <b>749.4556</b> | 375.2314         |                |                  | L    | 674.3984         | 337.7028        | 657.3719  | 329.1896         | 656.3879        | 328.6976         | 5  |
| 9  | <b>879.5662</b>  | 440.2867        | 862.5397        | 431.7735         |                |                  | I    | <b>561.3144</b>  | 281.1608        | 544.2878  | 272.6475         | 543.3038        | 272.1555         | 4  |
| 10 | <b>1065.6455</b> | 533.3264        | 1048.6190       | <b>524.8131</b>  |                |                  | W    | <b>448.2303</b>  | 224.6188        | 431.2037  | 216.1055         | 430.2197        | 215.6135         | 3  |
| 11 | <b>1152.6776</b> | 576.8424        | 1135.6510       | 568.3291         | 1134.6670      | 567.8371         | S    | <b>262.1510</b>  | 131.5791        | 245.1244  | 123.0659         | 244.1404        | 122.5738         | 2  |
| 12 |                  |                 |                 |                  |                |                  | R    | 175.1190         | 88.0631         | 158.0924  | 79.5498          |                 |                  | 1  |

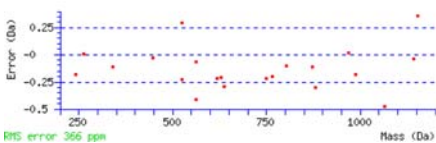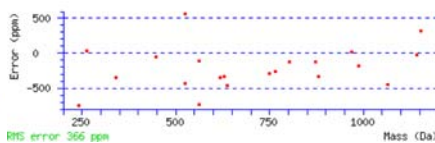

NCBI BLAST search of [ALGVLAQLIWSR](#)  
 (Parameters: blastp, nr protein database, expect=20000, no filter, PAM30)  
 Other BLAST [web gateways](#)

**All matches to this query**

| Score | Mr(calc): | Delta  | Sequence                     |
|-------|-----------|--------|------------------------------|
| 50.6  | 1325.7819 | 0.0011 | <a href="#">ALGVLAQLIWSR</a> |

Mascot: <http://www.matrixscience.com/>

**MASCOT** **SCIENCE** Mascot Search Results

Peptide View

MS/MS Fragmentation of **IPAFLNVVVDIAGLVK**  
 Found in **GTPB9\_MOUSE**, Putative GTP-binding protein 9 - Mus musculus (Mouse) (Q9CZ30)

Match to Query 894: 1567.935334 from(784.974943,2+)  
 Title: Arrell12300840 scan 2117 2119 (Arrell12300840.2117.2119.2.dta)  
 Data file Arrell12300840.mgf

Click mouse within plot area to zoom in by factor of two about that point  
 Or, Plot from 200 to 1500 Da Full range

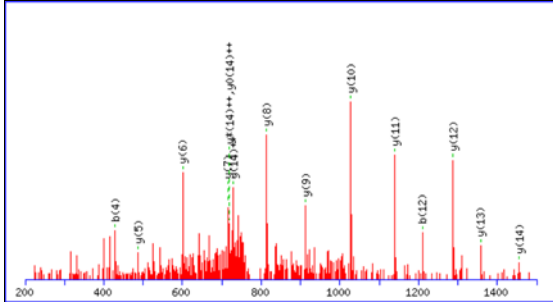

Monoisotopic mass of neutral peptide Mr(calc): 1567.9338  
 Ions Score: 64 Expect: 3.5e-07  
 Matches (Bold Red): 15/130 Fragment ions using 30 most intense peaks

| #  | b                | b <sup>++</sup> | b*        | b* <sup>++</sup> | b <sup>0</sup> | b <sup>0</sup> ++ | Seq.     | y                | y <sup>++</sup> | y*        | y* <sup>++</sup> | y <sup>0</sup> | y <sup>0</sup> ++ | #         |
|----|------------------|-----------------|-----------|------------------|----------------|-------------------|----------|------------------|-----------------|-----------|------------------|----------------|-------------------|-----------|
| 1  | 114.0913         | 57.5493         |           |                  |                |                   | <b>I</b> |                  |                 |           |                  |                |                   | <b>15</b> |
| 2  | 211.1441         | 106.0757        |           |                  |                |                   | <b>P</b> | <b>1455.8570</b> | <b>728.4321</b> | 1438.8304 | <b>719.9189</b>  | 1437.8464      | <b>719.4268</b>   | <b>14</b> |
| 3  | 282.1812         | 141.5942        |           |                  |                |                   | <b>A</b> | <b>1358.8042</b> | 679.9057        | 1341.7777 | 671.3925         | 1340.7936      | 670.9005          | <b>13</b> |
| 4  | <b>429.2496</b>  | 215.1285        |           |                  |                |                   | <b>F</b> | <b>1287.7671</b> | 644.3872        | 1270.7406 | 635.8739         | 1269.7565      | 635.3819          | <b>12</b> |
| 5  | 542.3337         | 271.6705        |           |                  |                |                   | <b>L</b> | <b>1140.6987</b> | 570.8530        | 1123.6721 | 562.3397         | 1122.6881      | 561.8477          | <b>11</b> |
| 6  | 656.3766         | 328.6919        | 639.3501  | 320.1787         |                |                   | <b>N</b> | <b>1027.6146</b> | 514.3109        | 1010.5881 | 505.7977         | 1009.6041      | 505.3057          | <b>10</b> |
| 7  | 755.4450         | 378.2262        | 738.4185  | 369.7129         |                |                   | <b>V</b> | <b>913.5717</b>  | 457.2895        | 896.5451  | 448.7762         | 895.5611       | 448.2842          | <b>9</b>  |
| 8  | 854.5135         | 427.7604        | 837.4869  | 419.2471         |                |                   | <b>V</b> | <b>814.5033</b>  | 407.7553        | 797.4767  | 399.2420         | 796.4927       | 398.7500          | <b>8</b>  |
| 9  | 969.5404         | 485.2738        | 952.5138  | 476.7606         | 951.5298       | 476.2686          | <b>D</b> | <b>715.4349</b>  | 358.2211        | 698.4083  | 349.7078         | 697.4243       | 349.2158          | <b>7</b>  |
| 10 | 1082.6245        | 541.8159        | 1065.5979 | 533.3026         | 1064.6139      | 532.8106          | <b>I</b> | <b>600.4079</b>  | 300.7076        | 583.3814  | 292.1943         |                |                   | <b>6</b>  |
| 11 | 1153.6616        | 577.3344        | 1136.6350 | 568.8211         | 1135.6510      | 568.3291          | <b>A</b> | <b>487.3239</b>  | 244.1656        | 470.2973  | 235.6523         |                |                   | <b>5</b>  |
| 12 | <b>1210.6830</b> | 605.8452        | 1193.6565 | 597.3319         | 1192.6725      | 596.8399          | <b>G</b> | 416.2867         | 208.6470        | 399.2602  | 200.1337         |                |                   | <b>4</b>  |
| 13 | 1323.7671        | 662.3872        | 1306.7406 | 653.8739         | 1305.7565      | 653.3819          | <b>L</b> | 359.2653         | 180.1363        | 342.2387  | 171.6230         |                |                   | <b>3</b>  |
| 14 | 1422.8355        | 711.9214        | 1405.8090 | 703.4081         | 1404.8249      | 702.9161          | <b>V</b> | 246.1812         | 123.5942        | 229.1547  | 115.0810         |                |                   | <b>2</b>  |
| 15 |                  |                 |           |                  |                |                   | <b>K</b> | 147.1128         | 74.0600         | 130.0863  | 65.5468          |                |                   | <b>1</b>  |

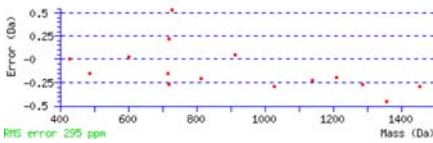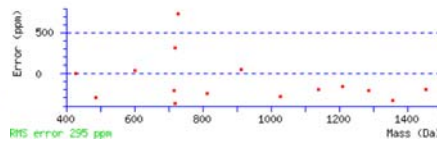

NCBI BLAST search of **IPAFLNVVVDIAGLVK**  
 (Parameters: blastp, nr protein database, expect=20000, no filter, PAM30)  
 Other BLAST [web gateways](#)

All matches to this query

| Score | Mr(calc): | Delta  | Sequence                         |
|-------|-----------|--------|----------------------------------|
| 64.1  | 1567.9338 | 0.0016 | <a href="#">IPAFLNVVVDIAGLVK</a> |

Mascot: <http://www.matrixscience.com/>

**Mascot Search Results**

**Peptide View**

MS/MS Fragmentation of **ASQQDFENALNQVK**

Found in **PECL\_MOUSE**, Peroxisomal 3,2-trans-enoyl-CoA isomerase (EC 5.3.3.8) (Dodecenoyl-CoA isomerase) (Delta(3),delta(2)-enoyl-CoA isomerase) (D3,D2-enoyl-CoA isomerase) - Mus musculus (Mouse) (Q9WUR2)

Match to Query 865: 1590.763764 from(796.389158,2+)

Title: Arrell12300842\_scan\_1082\_1082 (Arrell12300842.1082.1082.2.dta)

Data file Arrell12300842.mgf

Click mouse within plot area to zoom in by factor of two about that point

Or, Plot from 200 to 1600 Da **Full range**

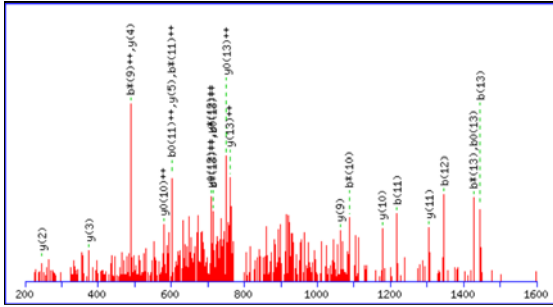

Monoisotopic mass of neutral peptide Mr(calc): 1590.7638

Ions Score: 39 Expect: 0.001

Matches (Bold Red): 23/136 fragment ions using 30 most intense peaks

| #  | b                | b <sup>++</sup> | b*               | b <sup>*++</sup> | b <sup>0</sup>   | b <sup>0++</sup> | Seq. | y                | y <sup>++</sup> | y*        | y <sup>*++</sup> | y <sup>0</sup> | y <sup>0++</sup> | #  |
|----|------------------|-----------------|------------------|------------------|------------------|------------------|------|------------------|-----------------|-----------|------------------|----------------|------------------|----|
| 1  | 72.0444          | 36.5258         |                  |                  |                  |                  | A    |                  |                 |           |                  |                |                  | 14 |
| 2  | 159.0764         | 80.0418         |                  |                  | 141.0659         | 71.0366          | S    | 1520.7340        | <b>760.8706</b> | 1503.7074 | 752.3573         | 1502.7234      | <b>751.8653</b>  | 13 |
| 3  | 287.1350         | 144.0711        | 270.1084         | 135.5579         | 269.1244         | 135.0659         | Q    | 1433.7019        | 717.3546        | 1416.6754 | <b>708.8413</b>  | 1415.6914      | <b>708.3493</b>  | 12 |
| 4  | 415.1936         | 208.1004        | 398.1670         | 199.5872         | 397.1830         | 199.0951         | Q    | <b>1305.6434</b> | 653.3253        | 1288.6168 | 644.8120         | 1287.6328      | 644.3200         | 11 |
| 5  | 530.2205         | 265.6139        | 513.1940         | 257.1006         | 512.2100         | 256.6086         | D    | <b>1177.5848</b> | 589.2960        | 1160.5582 | 580.7828         | 1159.5742      | <b>580.2907</b>  | 10 |
| 6  | 677.2889         | 339.1481        | 660.2624         | 330.6348         | 659.2784         | 330.1428         | F    | <b>1062.5578</b> | 531.7826        | 1045.5313 | 523.2693         | 1044.5473      | 522.7773         | 9  |
| 7  | 806.3315         | 403.6694        | 789.3050         | 395.1561         | 788.3210         | 394.6641         | E    | 915.4894         | 458.2483        | 898.4629  | 449.7351         | 897.4789       | 449.2431         | 8  |
| 8  | 920.3745         | 460.6909        | 903.3479         | 452.1776         | 902.3639         | 451.6856         | N    | 786.4468         | 393.7271        | 769.4203  | 385.2138         |                |                  | 7  |
| 9  | 991.4116         | 496.2094        | 974.3850         | <b>487.6961</b>  | 973.4010         | 487.2041         | A    | 672.4039         | 336.7056        | 655.3774  | 328.1923         |                |                  | 6  |
| 10 | 1104.4956        | 552.7515        | <b>1087.4691</b> | 544.2382         | 1086.4851        | 543.7462         | L    | <b>601.3668</b>  | 301.1870        | 584.3402  | 292.6738         |                |                  | 5  |
| 11 | <b>1218.5386</b> | 609.7729        | 1201.5120        | <b>601.2596</b>  | 1200.5280        | <b>600.7676</b>  | N    | <b>488.2827</b>  | 244.6450        | 471.2562  | 236.1317         |                |                  | 4  |
| 12 | <b>1346.5971</b> | 673.8022        | 1329.5706        | 665.2889         | 1328.5866        | 664.7969         | Q    | <b>374.2398</b>  | 187.6235        | 357.2132  | 179.1103         |                |                  | 3  |
| 13 | <b>1445.6655</b> | 723.3364        | <b>1428.6390</b> | <b>714.8231</b>  | <b>1427.6550</b> | <b>714.3311</b>  | V    | <b>246.1812</b>  | 123.5942        | 229.1547  | 115.0810         |                |                  | 2  |
| 14 |                  |                 |                  |                  |                  |                  | K    | 147.1128         | 74.0600         | 130.0863  | 65.5468          |                |                  | 1  |

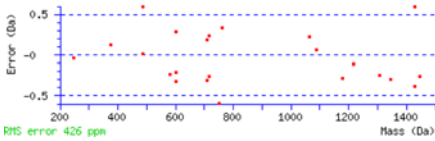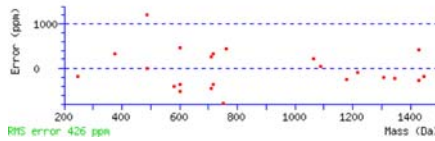

NCBI BLAST search of **ASQQDFENALNQVK**

(Parameters: blastp, nr protein database, expect=20000, no filter, PAM30)

Other BLAST [web gateways](#)

All matches to this query

| Score | Mr(calc): | Delta   | Sequence              |
|-------|-----------|---------|-----------------------|
| 39.2  | 1590.7638 | -0.0000 | <b>ASQQDFENALNQVK</b> |

Mascot: <http://www.matrixscience.com/>



**Mascot Search Results**

**Peptide View**

MS/MS Fragmentation of **GEFITTVQQR**

Found in **MDHC\_MOUSE**, Malate dehydrogenase, cytoplasmic (EC 1.1.1.37) (Cytosolic malate dehydrogenase) - Mus musculus (Mouse) (P14152)

Match to Query 479: 1177.610574 from(589.812563,2+)  
 Title: Arrell12300843 scan 639 639 (Arrell12300843.639.639.2.dta)  
 Data file Arrell12300843.mgf

Click mouse within plot area to zoom in by factor of two about that point  
 Or, Plot from 150 to 1100 Da Full range

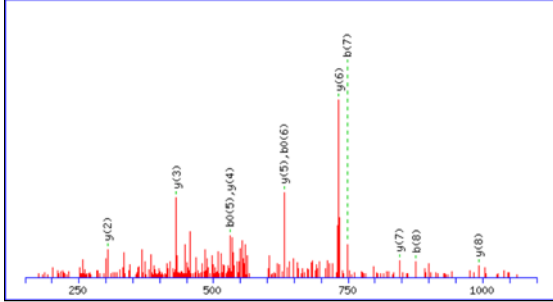

Monoisotopic mass of neutral peptide Mr(calc): 1177.6091  
 Ions Score: 61 Expect: 9e-06  
 Matches (Bold Red): 11/84 fragment ions using 15 most intense peaks

| #  | b               | b <sup>++</sup> | b*       | b <sup>*++</sup> | b <sup>0</sup>  | b <sup>0++</sup> | Seq. | y               | y <sup>++</sup> | y*        | y <sup>*++</sup> | y <sup>0</sup> | y <sup>0++</sup> | #  |
|----|-----------------|-----------------|----------|------------------|-----------------|------------------|------|-----------------|-----------------|-----------|------------------|----------------|------------------|----|
| 1  | 58.0287         | 29.5180         |          |                  |                 |                  | G    |                 |                 |           |                  |                |                  | 10 |
| 2  | 187.0713        | 94.0393         |          |                  | 169.0608        | 85.0340          | E    |                 | 561.3011        | 1104.5684 | 552.7878         | 1103.5844      | 552.2958         | 9  |
| 3  | 334.1397        | 167.5735        |          |                  | 316.1292        | 158.5682         | F    | <b>992.5524</b> | 496.7798        | 975.5258  | 488.2665         | 974.5418       | 487.7745         | 8  |
| 4  | 447.2238        | 224.1155        |          |                  | 429.2132        | 215.1103         | I    | <b>845.4839</b> | 423.2456        | 828.4574  | 414.7323         | 827.4734       | 414.2403         | 7  |
| 5  | 548.2715        | 274.6394        |          |                  | <b>530.2609</b> | 265.6341         | T    | <b>732.3999</b> | 366.7036        | 715.3733  | 358.1903         | 714.3893       | 357.6983         | 6  |
| 6  | 649.3192        | 325.1632        |          |                  | <b>631.3086</b> | 316.1579         | T    | <b>631.3522</b> | 316.1797        | 614.3257  | 307.6665         | 613.3416       | 307.1745         | 5  |
| 7  | <b>748.3876</b> | 374.6974        |          |                  | 730.3770        | 365.6921         | V    | <b>530.3045</b> | 265.6559        | 513.2780  | 257.1426         |                |                  | 4  |
| 8  | <b>876.4462</b> | 438.7267        | 859.4196 | 430.2134         | 858.4356        | 429.7214         | Q    | <b>431.2361</b> | 216.1217        | 414.2096  | 207.6084         |                |                  | 3  |
| 9  | 1004.5047       | 502.7560        | 987.4782 | 494.2427         | 986.4942        | 493.7507         | Q    | <b>303.1775</b> | 152.0924        | 286.1510  | 143.5791         |                |                  | 2  |
| 10 |                 |                 |          |                  |                 |                  | R    | 175.1190        | 88.0631         | 158.0924  | 79.5498          |                |                  | 1  |

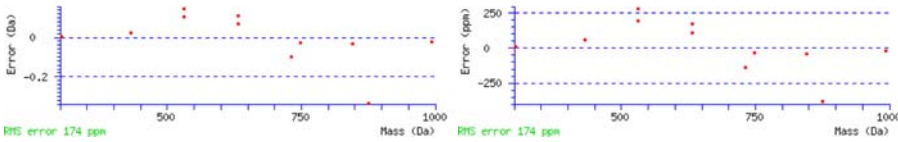

NCBI BLAST search of [GEFITTVQQR](#)  
 (Parameters: blastp, nr protein database, expect=20000, no filter, PAM30)  
 Other BLAST [web gateways](#)

**All matches to this query**

| Score | Mr(calc): | Delta   | Sequence                    |
|-------|-----------|---------|-----------------------------|
| 61.4  | 1177.6091 | 0.0014  | <a href="#">GEFITTVQQR</a>  |
| 5.8   | 1177.6125 | -0.0019 | <a href="#">GTEMVITKSGR</a> |
| 1.9   | 1177.6125 | -0.0019 | <a href="#">AGSSAMKLLER</a> |

Mascot: <http://www.matrixscience.com/>

**(MATRIX) (SCIENCE) Mascot Search Results**

**Peptide View**

MS/MS Fragmentation of **VIGNQSLVNELTFSAR**

Found in **ECHL\_MOUSE**, Delta(3,5)-Delta(2,4)-dienoyl-CoA isomerase, mitochondrial precursor (EC 5.3.3.-) - Mus musculus (Mouse) (O35459)

Match to Query 657: 1746.929294 from(874.471923,2+)

Title: Arrell12300844 scan 1231 1231 (Arrell12300844.1231.1231.2.dta)

Data file Arrell12300844.mgf

Click mouse within plot area to zoom in by factor of two about that point

Or, Plot from 200 to 1600 Da Full range

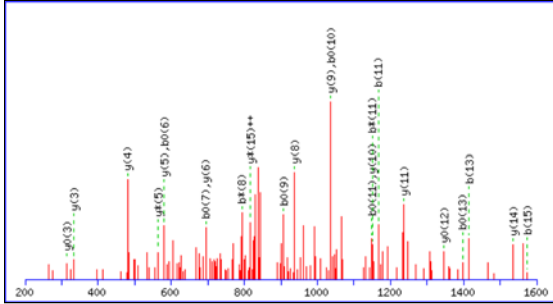

Monoisotopic mass of neutral peptide Mr(calc): 1746.9264

Ions Score: 59 Expect: 4.8e-06

Matches (Bold Red): 24/160 fragment ions using 34 most intense peaks

| #  | b                | b <sup>++</sup> | b <sup>*</sup>   | b <sup>*++</sup> | b <sup>0</sup>   | b <sup>0++</sup> | Seq. | y                | y <sup>++</sup> | y <sup>*</sup>  | y <sup>*++</sup> | y <sup>0</sup>   | y <sup>0++</sup> | #  |
|----|------------------|-----------------|------------------|------------------|------------------|------------------|------|------------------|-----------------|-----------------|------------------|------------------|------------------|----|
| 1  | 100.0757         | 50.5415         |                  |                  |                  |                  | V    |                  |                 |                 |                  |                  |                  | 16 |
| 2  | 213.1598         | 107.0835        |                  |                  |                  |                  | I    | 1648.8653        | 824.9363        | 1631.8388       | <b>816.4230</b>  | 1630.8547        | 815.9310         | 15 |
| 3  | 270.1812         | 135.5942        |                  |                  |                  |                  | G    | <b>1535.7812</b> | 768.3943        | 1518.7547       | 759.8810         | 1517.7707        | 759.3890         | 14 |
| 4  | 384.2241         | 192.6157        | 367.1976         | 184.1024         |                  |                  | N    | 1478.7598        | 739.8835        | 1461.7332       | 731.3703         | 1460.7492        | 730.8782         | 13 |
| 5  | 512.2827         | 256.6450        | 495.2562         | 248.1317         |                  |                  | Q    | 1364.7169        | 682.8621        | 1347.6903       | 674.3488         | <b>1346.7063</b> | 673.8568         | 12 |
| 6  | 599.3148         | 300.1610        | 582.2882         | 291.6477         | <b>581.3042</b>  | 291.1557         | S    | <b>1236.6583</b> | 618.8328        | 1219.6317       | 610.3195         | 1218.6477        | 609.8275         | 11 |
| 7  | 712.3988         | 356.7030        | 695.3723         | 348.1898         | <b>694.3883</b>  | 347.6978         | L    | <b>1149.6262</b> | 575.3168        | 1132.5997       | 566.8035         | 1131.6157        | 566.3115         | 10 |
| 8  | 811.4672         | 406.2373        | <b>794.4407</b>  | 397.7240         | 793.4567         | 397.2320         | V    | <b>1036.5422</b> | 518.7747        | 1019.5156       | 510.2615         | 1018.5316        | 509.7694         | 9  |
| 9  | 925.5102         | 463.2587        | 908.4836         | 454.7454         | <b>907.4996</b>  | 454.2534         | N    | <b>937.4738</b>  | 469.2405        | 920.4472        | 460.7272         | 919.4632         | 460.2352         | 8  |
| 10 | 1054.5527        | 527.7800        | 1037.5262        | 519.2667         | <b>1036.5422</b> | 518.7747         | E    | 823.4308         | 412.2191        | 806.4043        | 403.7058         | 805.4203         | 403.2138         | 7  |
| 11 | <b>1167.6368</b> | 584.3220        | <b>1150.6103</b> | 575.8088         | <b>1149.6262</b> | 575.3168         | L    | <b>694.3883</b>  | 347.6978        | 677.3617        | 339.1845         | 676.3777         | 338.6925         | 6  |
| 12 | 1268.6845        | 634.8459        | 1251.6579        | 626.3326         | 1250.6739        | 625.8406         | T    | <b>581.3042</b>  | 291.1557        | <b>564.2776</b> | 282.6425         | 563.2936         | 282.1504         | 5  |
| 13 | <b>1415.7529</b> | 708.3801        | 1398.7264        | 699.8668         | <b>1397.7423</b> | 699.3748         | F    | <b>480.2565</b>  | 240.6319        | 463.2300        | 232.1186         | 462.2459         | 231.6266         | 4  |
| 14 | 1502.7849        | 751.8961        | 1485.7584        | 743.3828         | 1484.7744        | 742.8908         | S    | <b>333.1881</b>  | 167.0977        | 316.1615        | 158.5844         | <b>315.1775</b>  | 158.0924         | 3  |
| 15 | <b>1573.8220</b> | 787.4147        | 1556.7955        | 778.9014         | 1555.8115        | 778.4094         | A    | 246.1561         | 123.5817        | 229.1295        | 115.0684         |                  |                  | 2  |
| 16 |                  |                 |                  |                  |                  |                  | R    | 175.1190         | 88.0631         | 158.0924        | 79.5498          |                  |                  | 1  |

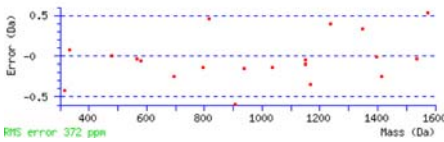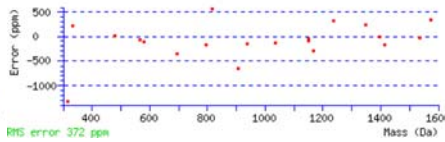

NCBI BLAST search of **VIGNQSLVNELTFSAR**

(Parameters: blastp, nr protein database, expect=20000, no filter, PAM30)

Other BLAST [web gateways](#)

All matches to this query

| Score | Mr(calc): | Delta  | Sequence                         |
|-------|-----------|--------|----------------------------------|
| 59.2  | 1746.9264 | 0.0029 | <a href="#">VIGNQSLVNELTFSAR</a> |

Mascot: <http://www.matrixscience.com/>

**MASCOT** **SCIENCE** Mascot Search Results

**Peptide View**

MS/MS Fragmentation of **RVAEER**

Found in **MAP7\_MOUSE**, Enscosin (Microtubule-associated protein 7) (Epithelial microtubule-associated protein of 115 kDa) (E-MAP-115) - Mus musculus (Mouse) (O88735)

Match to Query 22: 758.403174 from(380.208863,2+)

Title: Arrell12290805 scan 268 268 (Arrell12290805.268.268.2.dta)

Data file Arrell12290805.mgf

Click mouse within plot area to zoom in by factor of two about that point

Or, Plot from 100 to 700 Da **Full range**

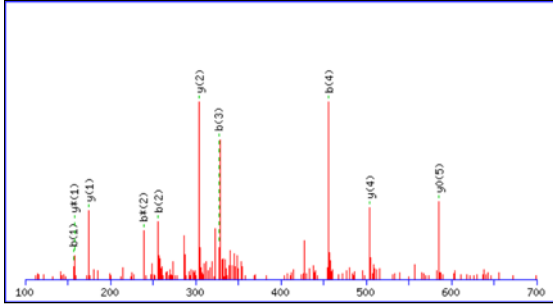

Monoisotopic mass of neutral peptide Mr(calc): 758.4035

Ions Score: 34 Expect: 0.0068

Matches (Bold Red): 11/52 fragment ions using 20 most intense peaks

| #        | b               | b <sup>++</sup> | b*              | b <sup>*++</sup> | b <sup>0</sup> | b <sup>0++</sup> | Seq.     | y               | y <sup>++</sup> | y*              | y <sup>*++</sup> | y <sup>0</sup>  | y <sup>0++</sup> | #        |
|----------|-----------------|-----------------|-----------------|------------------|----------------|------------------|----------|-----------------|-----------------|-----------------|------------------|-----------------|------------------|----------|
| <b>1</b> | <b>157.1084</b> | 79.0578         | 140.0818        | 70.5446          |                |                  | <b>R</b> |                 |                 |                 |                  |                 |                  | <b>6</b> |
| <b>2</b> | <b>256.1768</b> | 128.5920        | <b>239.1503</b> | 120.0788         |                |                  | <b>V</b> | 603.3097        | 302.1585        | 586.2831        | 293.6452         | <b>585.2991</b> | 293.1532         | <b>5</b> |
| <b>3</b> | <b>327.2139</b> | 164.1106        | 310.1874        | 155.5973         |                |                  | <b>A</b> | <b>504.2413</b> | 252.6243        | 487.2147        | 244.1110         | 486.2307        | 243.6190         | <b>4</b> |
| <b>4</b> | <b>456.2565</b> | 228.6319        | 439.2300        | 220.1186         | 438.2459       | 219.6266         | <b>E</b> | 433.2041        | 217.1057        | 416.1776        | 208.5924         | 415.1936        | 208.1004         | <b>3</b> |
| <b>5</b> | <b>585.2991</b> | 293.1532        | 568.2726        | 284.6399         | 567.2885       | 284.1479         | <b>E</b> | <b>304.1615</b> | 152.5844        | 287.1350        | 144.0711         | 286.1510        | 143.5791         | <b>2</b> |
| <b>6</b> |                 |                 |                 |                  |                |                  | <b>R</b> | <b>175.1190</b> | 88.0631         | <b>158.0924</b> | 79.5498          |                 |                  | <b>1</b> |

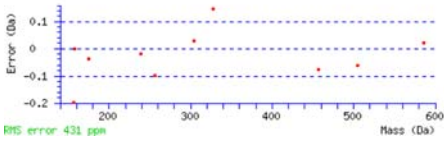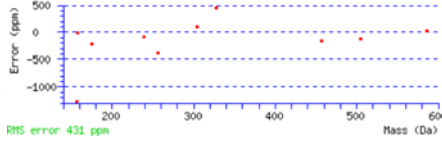

NCBI BLAST search of **RVAEER**

(Parameters: blastp, nr protein database, expect=20000, no filter, PAM30)

Other BLAST [web gateways](#)

**All matches to this query**

| Score | Mr(calc): | Delta   | Sequence                |
|-------|-----------|---------|-------------------------|
| 34.0  | 758.4035  | -0.0003 | <a href="#">RVAEER</a>  |
| 21.9  | 758.4035  | -0.0003 | <a href="#">RVAEER</a>  |
| 17.7  | 758.4035  | -0.0003 | <a href="#">RGIEER</a>  |
| 14.7  | 758.4035  | -0.0003 | <a href="#">REVAER</a>  |
| 13.8  | 758.4109  | -0.0077 | <a href="#">MATALPR</a> |
| 13.8  | 758.4035  | -0.0003 | <a href="#">TIPRER</a>  |
| 10.9  | 758.4035  | -0.0003 | <a href="#">DALRER</a>  |
| 10.9  | 758.4035  | -0.0003 | <a href="#">EVARER</a>  |
| 10.9  | 758.3936  | 0.0096  | <a href="#">FRGHSR</a>  |
| 10.9  | 758.4035  | -0.0003 | <a href="#">IDARER</a>  |

Mascot: <http://www.matrixscience.com/>

**(MATRIX) (SCIENCE) Mascot Search Results**

**Peptide View**

MS/MS Fragmentation of **VVNVSSMVSLR**

Found in **CBRL\_MOUSE**, Carbonyl reductase [NADPH] 1 (EC 1.1.1.184) (NADPH-dependent carbonyl reductase 1) - Mus musculus (Mouse) (P48758)

Match to Query 756: 1205.647064 from(603.830808,2+)

Title: Arrell01100950 scan 662 662 (Arrell01100950.662.662.2.dta)

Data file Arrell01100950.mgf

Click mouse within plot area to zoom in by factor of two about that point

Or, Plot from 150 to 1150 Da **Full range**

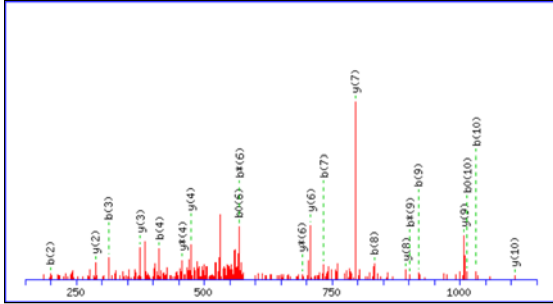

Monoisotopic mass of neutral peptide Mr(calc): 1205.6438

Variable modifications:

M7 : Oxidation (M), with neutral losses 0.0000(shown in table), 63.9983

Ions Score: 50 Expect: 0.00011

Matches (Bold Red): 21/164 fragment ions using 44 most intense peaks

| #  | b                | b <sup>++</sup> | b <sup>*</sup>  | b <sup>*++</sup> | b <sup>0</sup>   | b <sup>0++</sup> | Seq. | y                | y <sup>++</sup> | y <sup>*</sup>  | y <sup>*++</sup> | y <sup>0</sup> | y <sup>0++</sup> | #  |
|----|------------------|-----------------|-----------------|------------------|------------------|------------------|------|------------------|-----------------|-----------------|------------------|----------------|------------------|----|
| 1  | 100.0757         | 50.5415         |                 |                  |                  |                  | V    |                  |                 |                 |                  |                |                  | 11 |
| 2  | <b>199.1441</b>  | 100.0757        |                 |                  |                  |                  | V    | <b>1107.5827</b> | 554.2950        | 1090.5561       | 545.7817         | 1089.5721      | 545.2897         | 10 |
| 3  | <b>313.1870</b>  | 157.0972        | 296.1605        | 148.5839         |                  |                  | N    | <b>1008.5143</b> | 504.7608        | 991.4877        | 496.2475         | 990.5037       | 495.7555         | 9  |
| 4  | <b>412.2554</b>  | 206.6314        | 395.2289        | 198.1181         |                  |                  | V    | <b>894.4713</b>  | 447.7393        | 877.4448        | 439.2260         | 876.4608       | 438.7340         | 8  |
| 5  | 499.2875         | 250.1474        | 482.2609        | 241.6341         | 481.2769         | 241.1421         | S    | <b>795.4029</b>  | 398.2051        | 778.3764        | 389.6918         | 777.3924       | 389.1998         | 7  |
| 6  | 586.3195         | 293.6634        | <b>569.2930</b> | 285.1501         | <b>568.3089</b>  | 284.6581         | S    | <b>708.3709</b>  | 354.6891        | <b>691.3443</b> | 346.1758         | 690.3603       | 345.6838         | 6  |
| 7  | <b>733.3549</b>  | 367.1811        | 716.3284        | 358.6678         | 715.3443         | 358.1758         | M    | 621.3389         | 311.1731        | 604.3123        | 302.6598         | 603.3283       | 302.1678         | 5  |
| 8  | <b>832.4233</b>  | 416.7153        | 815.3968        | 408.2020         | 814.4128         | 407.7100         | V    | <b>474.3035</b>  | 237.6554        | <b>457.2769</b> | 229.1421         | 456.2929       | 228.6501         | 4  |
| 9  | <b>919.4553</b>  | 460.2313        | <b>902.4288</b> | 451.7180         | 901.4448         | 451.2260         | S    | <b>375.2350</b>  | 188.1212        | 358.2085        | 179.6079         | 357.2245       | 179.1159         | 3  |
| 10 | <b>1032.5394</b> | 516.7733        | 1015.5129       | 508.2601         | <b>1014.5288</b> | 507.7681         | L    | <b>288.2030</b>  | 144.6051        | 271.1765        | 136.0919         |                |                  | 2  |
| 11 |                  |                 |                 |                  |                  |                  | R    | 175.1190         | 88.0631         | 158.0924        | 79.5498          |                |                  | 1  |

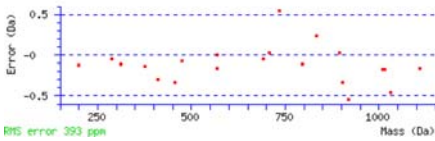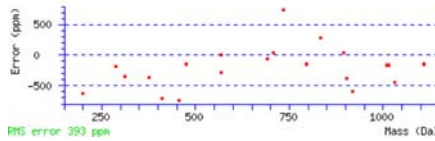

NCBI BLAST search of **VVNVSSMVSLR**

(Parameters: blastp, nr protein database, expect=20000, no filter, PAM30)

Other BLAST [web gateways](#)

All matches to this query

| Score | Mr(calc): | Delta  | Sequence                    |
|-------|-----------|--------|-----------------------------|
| 50.2  | 1205.6438 | 0.0032 | <a href="#">VVNVSSMVSLR</a> |
| 0.4   | 1205.6438 | 0.0033 | <a href="#">KTIGECSLSLR</a> |

Mascot: <http://www.matrixscience.com/>

**(MATRIX) (SCIENCE) Mascot Search Results**

**Peptide View**

MS/MS Fragmentation of **FNIQPGPIK**

Found in **DECR\_MOUSE**, 2,4-dienoyl-CoA reductase, mitochondrial precursor (EC 1.3.1.34) (2,4-dienoyl-CoA reductase [NADPH]) (4-enoyl-CoA reductase [NADPH]) - Mus musculus (Mouse) (Q9CQ62)

Match to Query 682: 1125.654024 from(563.834288,2+)

Title: Arrell01100950 scan 1133 1133 (Arrell01100950.1133.1133.2.dta)

Data file Arrell01100950.mgf

Click mouse within plot area to zoom in by factor of two about that point

Or, Plot from 150 to 1050 Da **Full range**

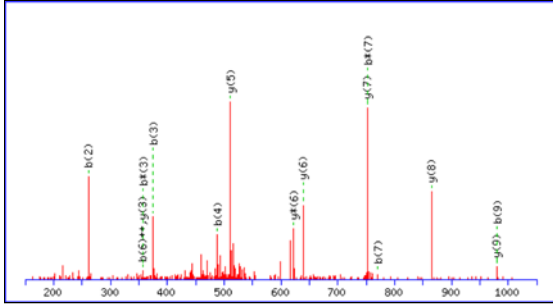

Monoisotopic mass of neutral peptide Mr(calc): 1125.6546

Ions Score: 51 Expect: 4e-05

Matches (Bold Red): 15/70 fragment ions using 22 most intense peaks

| #  | b               | b <sup>++</sup> | b*              | b <sup>+++</sup> | Seq.     | y               | y <sup>++</sup> | y*              | y <sup>+++</sup> | #         |
|----|-----------------|-----------------|-----------------|------------------|----------|-----------------|-----------------|-----------------|------------------|-----------|
| 1  | 148.0757        | 74.5415         |                 | 123.0497         | <b>F</b> |                 |                 |                 |                  | <b>10</b> |
| 2  | <b>262.1186</b> | 131.5629        | 245.0921        | 123.0497         | <b>N</b> | <b>979.5935</b> | 490.3004        | 962.5669        | 481.7871         | <b>9</b>  |
| 3  | <b>375.2027</b> | 188.1050        | <b>358.1761</b> | 179.5917         | <b>I</b> | <b>865.5506</b> | 433.2789        | 848.5240        | 424.7656         | <b>8</b>  |
| 4  | <b>488.2867</b> | 244.6470        | 471.2602        | 236.1337         | <b>I</b> | <b>752.4665</b> | 376.7369        | 735.4400        | 368.2236         | <b>7</b>  |
| 5  | 616.3453        | 308.6763        | 599.3188        | 300.1630         | <b>Q</b> | <b>639.3824</b> | 320.1949        | <b>622.3559</b> | 311.6816         | <b>6</b>  |
| 6  | 713.3981        | <b>357.2027</b> | 696.3715        | 348.6894         | <b>P</b> | <b>511.3239</b> | 256.1656        | 494.2973        | 247.6523         | <b>5</b>  |
| 7  | <b>770.4196</b> | 385.7134        | <b>753.3930</b> | 377.2001         | <b>G</b> | 414.2711        | 207.6392        | 397.2445        | 199.1259         | <b>4</b>  |
| 8  | 867.4723        | 434.2398        | 850.4458        | 425.7265         | <b>P</b> | <b>357.2496</b> | 179.1285        | 340.2231        | 170.6152         | <b>3</b>  |
| 9  | <b>980.5564</b> | 490.7818        | 963.5298        | 482.2686         | <b>I</b> | 260.1969        | 130.6021        | 243.1703        | 122.0888         | <b>2</b>  |
| 10 |                 |                 |                 |                  | <b>K</b> | 147.1128        | 74.0600         | 130.0863        | 65.5468          | <b>1</b>  |

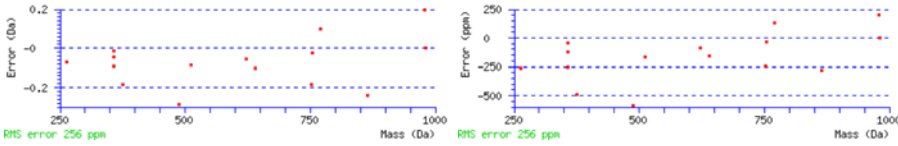

NCBI BLAST search of **FNIQPGPIK**

(Parameters: blastp, nr protein database, expect=20000, no filter, PAM30)

Other BLAST [web gateways](#)

All matches to this query

| Score | Mr(calc): | Delta   | Sequence          |
|-------|-----------|---------|-------------------|
| 50.5  | 1125.6546 | -0.0006 | <b>FNIQPGPIK</b>  |
| 9.9   | 1125.6618 | -0.0078 | <b>SKPVPSRLSR</b> |

Mascot: <http://www.matrixscience.com/>

**MASCOT** (SCIENCE) **Mascot Search Results**

**Peptide View**

MS/MS Fragmentation of **VAVSADPNVNVIVTR**

Found in **GDIR\_MOUSE**, Rho GDP-dissociation inhibitor 1 (Rho GDI 1) (Rho-GDI alpha) (GDI-1) - Mus musculus (Mouse) (Q99PT1)

Match to Query 634: 1649.910374 from(825.962463,2+)

Title: Arrell12300855 scan 974 974 (Arrell12300855.974.974.2.dta)

Data file Arrell12300855.mgf

Click mouse within plot area to zoom in by factor of two about that point

Or, Plot from 200 to 1700 Da **Full range**

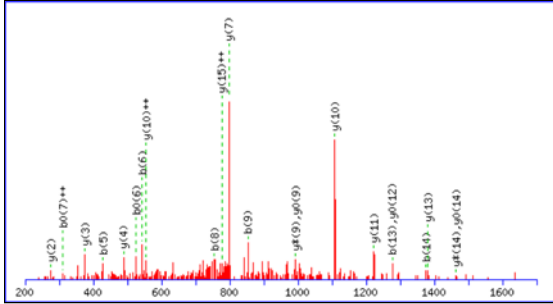

Monoisotopic mass of neutral peptide Mr(calc): 1649.9101

Ions Score: 37 Expect: 0.00064

Matches (Bold Red): 22/158 fragment ions using 40 most intense peaks

| #  | b                | b <sup>++</sup> | b*        | b <sup>*++</sup> | b <sup>0</sup>  | b <sup>0++</sup> | Seq. | y                | y <sup>++</sup> | y*               | y <sup>*++</sup> | y <sup>0</sup>   | y <sup>0++</sup> | #  |
|----|------------------|-----------------|-----------|------------------|-----------------|------------------|------|------------------|-----------------|------------------|------------------|------------------|------------------|----|
| 1  | 100.0757         | 50.5415         |           |                  |                 |                  | V    |                  |                 |                  |                  |                  |                  | 16 |
| 2  | 171.1128         | 86.0600         |           |                  |                 |                  | A    | 1551.8489        | <b>776.4281</b> | 1534.8224        | 767.9148         | 1533.8384        | 767.4228         | 15 |
| 3  | 270.1812         | 135.5942        |           |                  |                 |                  | V    | 1480.8118        | 740.9095        | <b>1463.7853</b> | 732.3963         | <b>1462.8013</b> | 731.9043         | 14 |
| 4  | 357.2132         | 179.1103        |           |                  | 339.2027        | 170.1050         | S    | <b>1381.7434</b> | 691.3753        | 1364.7169        | 682.8621         | 1363.7328        | 682.3701         | 13 |
| 5  | <b>428.2504</b>  | 214.6288        |           |                  | 410.2398        | 205.6235         | A    | 1294.7114        | 647.8593        | 1277.6848        | 639.3461         | <b>1276.7008</b> | 638.8540         | 12 |
| 6  | <b>543.2773</b>  | 272.1423        |           |                  | <b>525.2667</b> | 263.1370         | D    | <b>1223.6743</b> | 612.3408        | 1206.6477        | 603.8275         | 1205.6637        | 603.3355         | 11 |
| 7  | 640.3301         | 320.6687        |           |                  | 622.3195        | <b>311.6634</b>  | P    | <b>1108.6473</b> | <b>554.8273</b> | 1091.6208        | 546.3140         | 1090.6368        | 545.8220         | 10 |
| 8  | <b>754.3730</b>  | 377.6901        | 737.3464  | 369.1769         | 736.3624        | 368.6849         | N    | 1011.5946        | 506.3009        | <b>994.5680</b>  | 497.7876         | <b>993.5840</b>  | 497.2956         | 9  |
| 9  | <b>853.4414</b>  | 427.2243        | 836.4149  | 418.7111         | 835.4308        | 418.2191         | V    | 897.5516         | 449.2795        | 880.5251         | 440.7662         | 879.5411         | 440.2742         | 8  |
| 10 | 950.4942         | 475.7507        | 933.4676  | 467.2374         | 932.4836        | 466.7454         | P    | <b>798.4832</b>  | 399.7452        | 781.4567         | 391.2320         | 780.4726         | 390.7400         | 7  |
| 11 | 1064.5371        | 532.7722        | 1047.5105 | 524.2589         | 1046.5265       | 523.7669         | N    | 701.4305         | 351.2189        | 684.4039         | 342.7056         | 683.4199         | 342.2136         | 6  |
| 12 | 1163.6055        | 582.3064        | 1146.5790 | 573.7931         | 1145.5949       | 573.3011         | V    | 587.3875         | 294.1974        | 570.3610         | 285.6841         | 569.3770         | 285.1921         | 5  |
| 13 | <b>1276.6896</b> | 638.8484        | 1259.6630 | 630.3352         | 1258.6790       | 629.8431         | I    | <b>488.3191</b>  | 244.6632        | 471.2926         | 236.1499         | 470.3085         | 235.6579         | 4  |
| 14 | <b>1375.7580</b> | 688.3826        | 1358.7314 | 679.8694         | 1357.7474       | 679.3774         | V    | <b>375.2350</b>  | 188.1212        | 358.2085         | 179.6079         | 357.2245         | 179.1159         | 3  |
| 15 | 1476.8057        | 738.9065        | 1459.7791 | 730.3932         | 1458.7951       | 729.9012         | T    | <b>276.1666</b>  | 138.5870        | 259.1401         | 130.0737         | 258.1561         | 129.5817         | 2  |
| 16 |                  |                 |           |                  |                 |                  | R    | 175.1190         | 88.0631         | 158.0924         | 79.5498          |                  |                  | 1  |

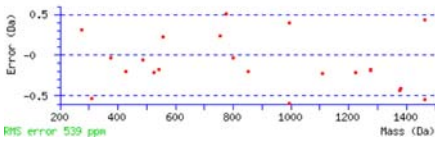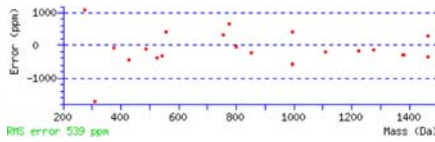

NCBI BLAST search of [VAVSADPNVNVIVTR](#)

(Parameters: blastp, nr protein database, expect=20000, no filter, PAM30)

Other BLAST [web gateways](#)

All matches to this query

| Score | Mr(calc): | Delta  | Sequence                        |
|-------|-----------|--------|---------------------------------|
| 36.7  | 1649.9101 | 0.0003 | <a href="#">VAVSADPNVNVIVTR</a> |

Mascot: <http://www.matrixscience.com/>

**(MATRIX) (SCIENCE) Mascot Search Results**

**Peptide View**

MS/MS Fragmentation of **NVLIVEDIIDTGK**

Found in **HPRT\_MOUSE**, Hypoxanthine-guanine phosphoribosyltransferase (EC 2.4.2.8) (HGPRT) (HGPRtase) (HPRT B) - Mus musculus (Mouse) (P00493)

Match to Query 679: 1427.788424 from(714.901488,2+)

Title: Arrell12300857 scan 1717 1717 (Arrell12300857.1717.1717.2.dta)

Data file Arrell12300857.mgf

Click mouse within plot area to zoom in by factor of two about that point

Or, Plot from 200 to 1400 Da Full range

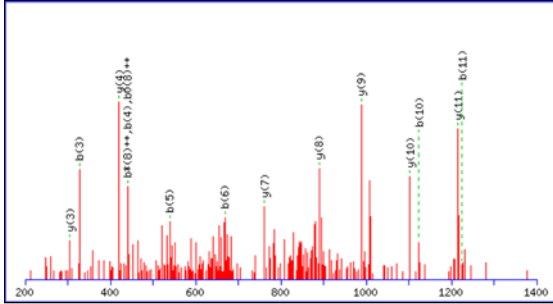

Monoisotopic mass of neutral peptide Mr(calc): 1427.7872

Ions Score: 64 Expect: 2.5e-06

Matches (Bold Red): 15/130 Fragment ions using 20 most intense peaks

| #  | b                | b <sup>++</sup> | b*        | b <sup>*++</sup> | b <sup>0</sup> | b <sup>0++</sup> | Seq. | y                | y <sup>++</sup> | y*        | y <sup>*++</sup> | y <sup>0</sup> | y <sup>0++</sup> | #  |
|----|------------------|-----------------|-----------|------------------|----------------|------------------|------|------------------|-----------------|-----------|------------------|----------------|------------------|----|
| 1  | 115.0502         | 58.0287         | 98.0237   | 49.5155          |                |                  | N    |                  |                 |           |                  |                |                  | 13 |
| 2  | 214.1186         | 107.5629        | 197.0921  | 99.0497          |                |                  | V    | 1314.7515        | 657.8794        | 1297.7250 | 649.3661         | 1296.7409      | 648.8741         | 12 |
| 3  | <b>327.2027</b>  | 164.1050        | 310.1761  | 155.5917         |                |                  | L    | <b>1215.6831</b> | 608.3452        | 1198.6565 | 599.8319         | 1197.6725      | 599.3399         | 11 |
| 4  | <b>440.2867</b>  | 220.6470        | 423.2602  | 212.1337         |                |                  | I    | <b>1102.5990</b> | 551.8032        | 1085.5725 | 543.2899         | 1084.5885      | 542.7979         | 10 |
| 5  | <b>539.3552</b>  | 270.1812        | 522.3286  | 261.6679         |                |                  | V    | <b>989.5150</b>  | 495.2611        | 972.4884  | 486.7478         | 971.5044       | 486.2558         | 9  |
| 6  | <b>668.3978</b>  | 334.7025        | 651.3712  | 326.1892         | 650.3872       | 325.6972         | E    | <b>890.4466</b>  | 445.7269        | 873.4200  | 437.2136         | 872.4360       | 436.7216         | 8  |
| 7  | 783.4247         | 392.2160        | 766.3981  | 383.7027         | 765.4141       | 383.2107         | D    | <b>761.4040</b>  | 381.2056        | 744.3774  | 372.6923         | 743.3934       | 372.2003         | 7  |
| 8  | 896.5088         | 448.7580        | 879.4822  | <b>440.2447</b>  | 878.4982       | <b>439.7527</b>  | I    | 646.3770         | 323.6921        | 629.3505  | 315.1789         | 628.3665       | 314.6869         | 6  |
| 9  | 1009.5928        | 505.3000        | 992.5663  | 496.7868         | 991.5823       | 496.2948         | I    | 533.2930         | 267.1501        | 516.2664  | 258.6368         | 515.2824       | 258.1448         | 5  |
| 10 | <b>1124.6198</b> | 562.8135        | 1107.5932 | 554.3002         | 1106.6092      | 553.8082         | D    | <b>420.2089</b>  | 210.6081        | 403.1823  | 202.0948         | 402.1983       | 201.6028         | 4  |
| 11 | <b>1225.6674</b> | 613.3374        | 1208.6409 | 604.8241         | 1207.6569      | 604.3321         | T    | <b>305.1819</b>  | 153.0946        | 288.1554  | 144.5813         | 287.1714       | 144.0893         | 3  |
| 12 | 1282.6889        | 641.8481        | 1265.6624 | 633.3348         | 1264.6783      | 632.8428         | G    | 204.1343         | 102.5708        | 187.1077  | 94.0575          |                |                  | 2  |
| 13 |                  |                 |           |                  |                |                  | K    | 147.1128         | 74.0600         | 130.0863  | 65.5468          |                |                  | 1  |

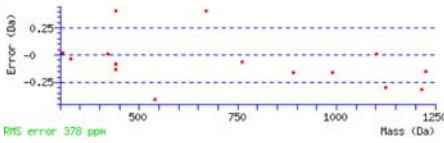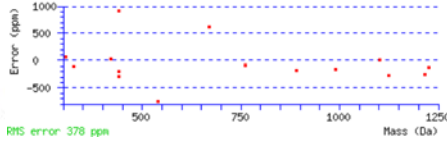

NCBI BLAST search of **NVLIVEDIIDTGK**

(Parameters: blastp, nr protein database, expect=20000, no filter, PAM30)

Other BLAST [web gateways](#)

All matches to this query

| Score | Mr(calc): | Delta  | Sequence                      |
|-------|-----------|--------|-------------------------------|
| 63.8  | 1427.7872 | 0.0013 | <a href="#">NVLIVEDIIDTGK</a> |

Mascot: <http://www.matrixscience.com/>

**Mascot Search Results**

**Peptide View**

MS/MS Fragmentation of **GQTSGQIVMPR**  
 Found in **ITPA\_MOUSE**, Inosine triphosphate pyrophosphatase (EC 3.6.1.19) (ITPase) (Inosine triphosphatase) - Mus musculus (Mouse) (Q9D892)

Match to Query 464: 1188.592194 from(595.303373.2+)  
 Title: Arrell12300868 scan 334 336 (Arrell12300868.334.336.2.dta)  
 Data file Arrell12300868.mgf

Click mouse within plot area to zoom in by factor of two about that point  
 Or, Plot from 150 to 1050 Da Full range

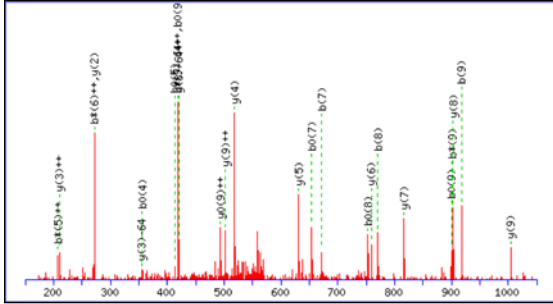

Monoisotopic mass of neutral peptide Mr(calc): 1188.5921  
 Variable modifications:  
 M9 : Oxidation (M), with neutral losses 0.0000(shown in table), 63.9983  
 Ions Score: 70 Expect: 1.1e-06  
 Matches (Bold Red): 26/150 fragment ions using 32 most intense peaks

| #  | b               | b <sup>++</sup> | b*              | b <sup>***</sup> | b <sup>0</sup>  | b <sup>0++</sup> | Seq. | y                | y <sup>++</sup> | y*        | y <sup>***</sup> | y <sup>0</sup> | y <sup>0++</sup> | #  |
|----|-----------------|-----------------|-----------------|------------------|-----------------|------------------|------|------------------|-----------------|-----------|------------------|----------------|------------------|----|
| 1  | 58.0287         | 29.5180         |                 |                  |                 |                  | G    |                  |                 |           |                  |                |                  | 11 |
| 2  | 186.0873        | 93.5473         | 169.0608        | 85.0340          |                 |                  | Q    | 1132.5779        | 566.7926        | 1115.5514 | 558.2793         | 1114.5674      | 557.7873         | 10 |
| 3  | 287.1350        | 144.0711        | 270.1084        | 135.5579         | 269.1244        | 135.0659         | T    | <b>1004.5193</b> | <b>502.7633</b> | 987.4928  | 494.2500         | 986.5088       | <b>493.7580</b>  | 9  |
| 4  | 374.1670        | 187.5872        | 357.1405        | 179.0739         | <b>356.1565</b> | 178.5819         | S    | <b>903.4717</b>  | 452.2395        | 886.4451  | 443.7262         | 885.4611       | 443.2342         | 8  |
| 5  | 431.1885        | 216.0979        | 414.1619        | <b>207.5846</b>  | <b>413.1779</b> | 207.0926         | G    | <b>816.4396</b>  | 408.7235        | 799.4131  | 400.2102         |                |                  | 7  |
| 6  | 559.2471        | 280.1272        | 542.2205        | <b>271.6139</b>  | 541.2365        | 271.1219         | Q    | <b>759.4182</b>  | 380.2127        | 742.3916  | 371.6995         |                |                  | 6  |
| 7  | <b>672.3311</b> | 336.6692        | 655.3046        | 328.1559         | <b>654.3206</b> | 327.6639         | I    | <b>631.3596</b>  | 316.1834        | 614.3330  | 307.6702         |                |                  | 5  |
| 8  | <b>771.3995</b> | 386.2034        | 754.3730        | 377.6901         | <b>753.3890</b> | 377.1981         | V    | <b>518.2755</b>  | 259.6414        | 501.2490  | 251.1281         |                |                  | 4  |
| 9  | <b>918.4349</b> | 459.7211        | <b>901.4084</b> | 451.2078         | <b>900.4244</b> | 450.7158         | M    | <b>419.2071</b>  | <b>210.1072</b> | 402.1806  | 201.5939         |                |                  | 3  |
| 10 | 1015.4877       | 508.2475        | 998.4612        | 499.7342         | 997.4771        | 499.2422         | P    | <b>272.1717</b>  | 136.5895        | 255.1452  | 128.0762         |                |                  | 2  |
| 11 |                 |                 |                 |                  |                 |                  | R    | 175.1190         | 88.0631         | 158.0924  | 79.5498          |                |                  | 1  |

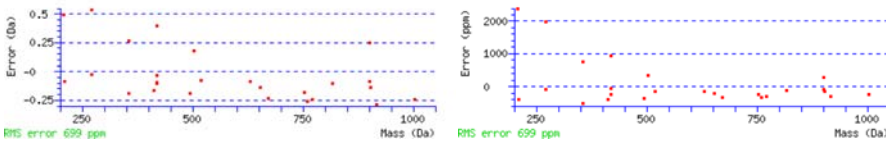

NCBI BLAST search of **GQTSGQIVMPR**  
 (Parameters: blastp, nr protein database, expect=20000, no filter, PAM30)  
 Other BLAST [web gateways](#)

**All matches to this query**

| Score | Mr(calc): | Delta   | Sequence                    |
|-------|-----------|---------|-----------------------------|
| 69.5  | 1188.5921 | 0.0001  | <a href="#">GQTSGQIVMPR</a> |
| 2.6   | 1188.5887 | 0.0035  | <a href="#">GGDETRLRFR</a>  |
| 0.7   | 1188.5986 | -0.0064 | <a href="#">ISATDEAQVOK</a> |



**MASCOT** Mascot Search Results

**Peptide View**

MS/MS Fragmentation of **AIFSVYVVK**

Found in **TPPC4\_MOUSE**, Trafficking protein particle complex subunit 4 (Synbindin) (TRS23 homolog) - Mus musculus (Mouse) (Q9ES56)

Match to Query 388: 1138.638214 from(570.326383,2+)

Title: Arrell12300879 scan 1037 1039 (Arrell12300879.1037.1039.2.dta)

Data file Arrell12300879.mgf

Click mouse within plot area to zoom in by factor of two about that point

Or, Plot from 150 to 1050 Da

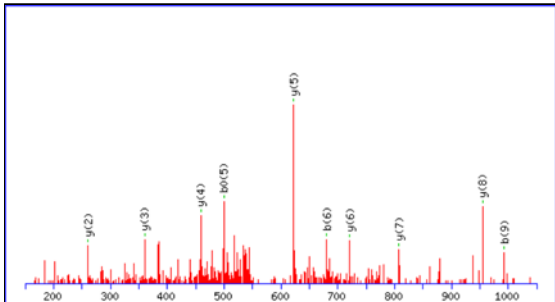

Monoisotopic mass of neutral peptide Mr(calc): 1138.6386

Ions Score: 60 Expect: 5e-06

Matches (Bold Red): 10/74 fragment ions using 11 most intense peaks

| #  | b               | b <sup>++</sup> | b*       | b <sup>*++</sup> | b <sup>0</sup>  | b <sup>0++</sup> | Seq. | y               | y <sup>++</sup> | y*        | y <sup>*++</sup> | y <sup>0</sup> | y <sup>0++</sup> | #  |
|----|-----------------|-----------------|----------|------------------|-----------------|------------------|------|-----------------|-----------------|-----------|------------------|----------------|------------------|----|
| 1  | 72.0444         | 36.5258         |          |                  |                 |                  | A    |                 |                 |           |                  |                |                  | 10 |
| 2  | 185.1285        | 93.0679         |          |                  |                 |                  | I    | 1068.6088       | 534.8080        | 1051.5823 | 526.2948         | 1050.5982      | 525.8028         | 9  |
| 3  | 332.1969        | 166.6021        |          |                  |                 |                  | F    | <b>955.5247</b> | 478.2660        | 938.4982  | 469.7527         | 937.5142       | 469.2607         | 8  |
| 4  | 419.2289        | 210.1181        |          |                  | 401.2183        | 201.1128         | S    | <b>808.4563</b> | 404.7318        | 791.4298  | 396.2185         | 790.4458       | 395.7265         | 7  |
| 5  | 518.2973        | 259.6523        |          |                  | <b>500.2867</b> | 250.6470         | V    | <b>721.4243</b> | 361.2158        | 704.3978  | 352.7025         |                |                  | 6  |
| 6  | <b>681.3606</b> | 341.1840        |          |                  | 663.3501        | 332.1787         | Y    | <b>622.3559</b> | 311.6816        | 605.3293  | 303.1683         |                |                  | 5  |
| 7  | 780.4291        | 390.7182        |          |                  | 762.4185        | 381.7129         | V    | <b>459.2926</b> | 230.1499        | 442.2660  | 221.6366         |                |                  | 4  |
| 8  | 879.4975        | 440.2524        |          |                  | 861.4869        | 431.2471         | V    | <b>360.2241</b> | 180.6157        | 343.1976  | 172.1024         |                |                  | 3  |
| 9  | <b>993.5404</b> | 497.2738        | 976.5138 | 488.7606         | 975.5298        | 488.2686         | N    | <b>261.1557</b> | 131.0815        | 244.1292  | 122.5682         |                |                  | 2  |
| 10 |                 |                 |          |                  |                 |                  | K    | 147.1128        | 74.0600         | 130.0863  | 65.5468          |                |                  | 1  |

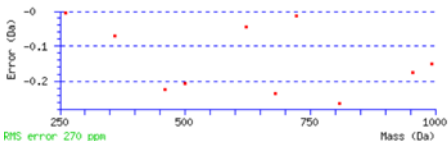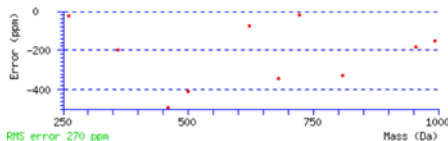

NCBI BLAST search of [AIFSVYVVK](#)

(Parameters: blastp, nr protein database, expect=20000, no filter, PAM30)

Other BLAST [web gateways](#)

All matches to this query

| Score | Mr(calc): | Delta   | Sequence                   |
|-------|-----------|---------|----------------------------|
| 59.5  | 1138.6386 | -0.0004 | <a href="#">AIFSVYVVK</a>  |
| 3.3   | 1137.6441 | 0.9941  | <a href="#">LRCHVVK</a>    |
| 1.4   | 1138.6346 | 0.0036  | <a href="#">QPSKPEIVNK</a> |

Mascot: <http://www.matrixscience.com/>

**(MATRIX) (SCIENCE) Mascot Search Results**

**Peptide View**

MS/MS Fragmentation of **GDFCIQVGR**

Found in **NDKA\_MOUSE**, Nucleoside diphosphate kinase A (EC 2.7.4.6) (NDK A) (NDP kinase A) (Tumor metastatic process-associated protein) (Metastasis inhibition factor NM23) (NDPK-A) (nm23-M1) - Mus musculus (Mouse) (P15532)

Match to Query 454: 1050.490204 from(526.252378.2+)

Title: Arrell12300881\_scan\_926\_928 (Arrell12300881.926.928.2.dta)

Data file Arrell12300881.mgf

Click mouse within plot area to zoom in by factor of two about that point

Or, Plot from |150 to |1000 Da **Full range**

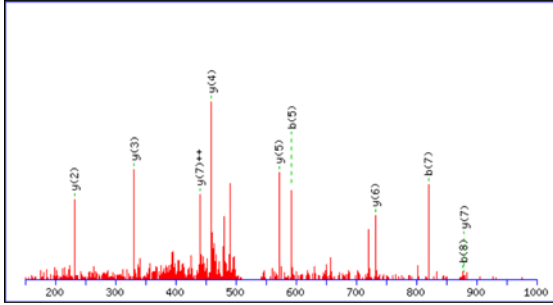

Monoisotopic mass of neutral peptide Mr(calc): 1050.4917

Variable modifications:

C4 : Carbamidomethyl (C)

Ions Score: 40 Expect: 0.0011

Matches (Bold Red): 10/70 fragment ions using 18 most intense peaks

| #        | b               | b <sup>++</sup> | b <sup>*</sup> | b <sup>*++</sup> | b <sup>0</sup> | b <sup>0++</sup> | Seq.     | y               | y <sup>++</sup> | y <sup>*</sup> | y <sup>*++</sup> | y <sup>0</sup> | y <sup>0++</sup> | #        |
|----------|-----------------|-----------------|----------------|------------------|----------------|------------------|----------|-----------------|-----------------|----------------|------------------|----------------|------------------|----------|
| <b>1</b> | 58.0287         | 29.5180         |                |                  |                |                  | <b>G</b> |                 |                 |                |                  |                |                  | <b>9</b> |
| <b>2</b> | 173.0557        | 87.0315         |                |                  | 155.0451       | 78.0262          | <b>D</b> | 994.4775        | 497.7424        | 977.4509       | 489.2291         | 976.4669       | 488.7371         | <b>8</b> |
| <b>3</b> | 320.1241        | 160.5657        |                |                  | 302.1135       | 151.5604         | <b>F</b> | <b>879.4505</b> | <b>440.2289</b> | 862.4240       | 431.7156         |                |                  | <b>7</b> |
| <b>4</b> | 480.1548        | 240.5810        |                |                  | 462.1442       | 231.5757         | <b>C</b> | <b>732.3821</b> | 366.6947        | 715.3556       | 358.1814         |                |                  | <b>6</b> |
| <b>5</b> | <b>593.2388</b> | 297.1230        |                |                  | 575.2283       | 288.1178         | <b>I</b> | <b>572.3515</b> | 286.6794        | 555.3249       | 278.1661         |                |                  | <b>5</b> |
| <b>6</b> | 721.2974        | 361.1523        | 704.2708       | 352.6391         | 703.2868       | 352.1471         | <b>Q</b> | <b>459.2674</b> | 230.1373        | 442.2409       | 221.6241         |                |                  | <b>4</b> |
| <b>7</b> | <b>820.3658</b> | 410.6865        | 803.3393       | 402.1733         | 802.3552       | 401.6813         | <b>V</b> | <b>331.2088</b> | 166.1081        | 314.1823       | 157.5948         |                |                  | <b>3</b> |
| <b>8</b> | <b>877.3873</b> | 439.1973        | 860.3607       | 430.6840         | 859.3767       | 430.1920         | <b>G</b> | <b>232.1404</b> | 116.5738        | 215.1139       | 108.0606         |                |                  | <b>2</b> |
| <b>9</b> |                 |                 |                |                  |                |                  | <b>R</b> | 175.1190        | 88.0631         | 158.0924       | 79.5498          |                |                  | <b>1</b> |

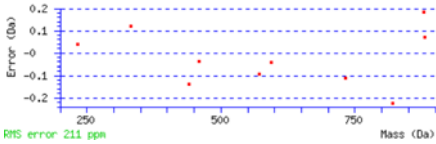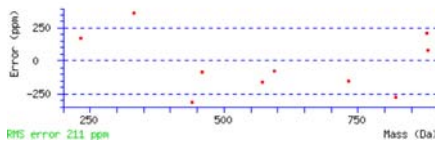

NCBI BLAST search of **GDFCIQVGR**

(Parameters: blastp, nr protein database, expect=20000, no filter, PAM30)

Other BLAST [web gateways](#)

All matches to this query

| Score | Mr(calc): | Delta   | Sequence                  |
|-------|-----------|---------|---------------------------|
| 39.8  | 1050.4917 | -0.0015 | <a href="#">GDFCIQVGR</a> |

Mascot: <http://www.matrixscience.com/>

**(MATRIX) (SCIENCE) Mascot Search Results**

**Peptide View**

MS/MS Fragmentation of **AMVNLQIQK**  
 Found in **ZCD1\_MOUSE**, Zinc finger CDGSH domain-containing protein 1 - Mus musculus (Mouse) (Q91WS0)

Match to Query 377: 1059.574194 from(530.794373,2+)  
 Title: Arrell12300884 scan 655 655 (Arrell12300884.655.655.2.dta)  
 Data file Arrell12300884.mgf

Click mouse within plot area to zoom in by factor of two about that point  
 Or, Plot from 150 to 1100 Da **Full range**

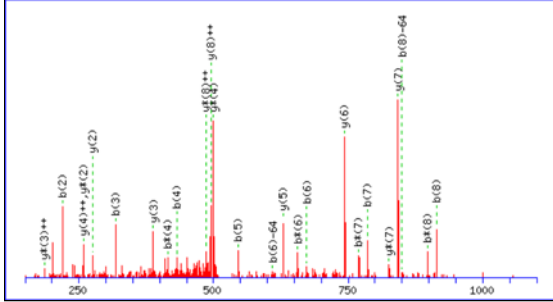

Monoisotopic mass of neutral peptide  $M_r(\text{calc})$ : 1059.5746  
 Variable modifications:  
 M2 : Oxidation (M), with neutral losses 0.0000 (shown in table), 63.9983  
 Ions Score: 35 Expect: 0.0045  
 Matches (**Bold Red**): 25/86 fragment ions using 56 most intense peaks

| # | b               | b <sup>++</sup> | b*              | b <sup>+++</sup> | Seq. | y               | y <sup>++</sup> | y*              | y <sup>+++</sup> | # |
|---|-----------------|-----------------|-----------------|------------------|------|-----------------|-----------------|-----------------|------------------|---|
| 1 | 72.0444         | 36.5258         |                 |                  | A    |                 |                 |                 |                  | 9 |
| 2 | <b>219.0798</b> | 110.0435        |                 |                  | M    | 989.5448        | <b>495.2761</b> | 972.5183        | <b>486.7628</b>  | 8 |
| 3 | <b>318.1482</b> | 159.5777        |                 |                  | V    | <b>842.5094</b> | 421.7584        | <b>825.4829</b> | 413.2451         | 7 |
| 4 | <b>432.1911</b> | 216.5992        | <b>415.1646</b> | 208.0859         | N    | <b>743.4410</b> | 372.2241        | 726.4145        | 363.7109         | 6 |
| 5 | <b>545.2752</b> | 273.1412        | 528.2486        | 264.6280         | L    | <b>629.3981</b> | 315.2027        | 612.3715        | 306.6894         | 5 |
| 6 | <b>673.3338</b> | 337.1705        | <b>656.3072</b> | 328.6573         | Q    | 516.3140        | <b>258.6607</b> | <b>499.2875</b> | 250.1474         | 4 |
| 7 | <b>786.4178</b> | 393.7126        | <b>769.3913</b> | 385.1993         | I    | <b>388.2554</b> | 194.6314        | 371.2289        | <b>186.1181</b>  | 3 |
| 8 | <b>914.4764</b> | 457.7418        | <b>897.4499</b> | 449.2286         | Q    | <b>275.1714</b> | 138.0893        | <b>258.1448</b> | 129.5761         | 2 |
| 9 |                 |                 |                 |                  | K    | 147.1128        | 74.0600         | 130.0863        | 65.5468          | 1 |

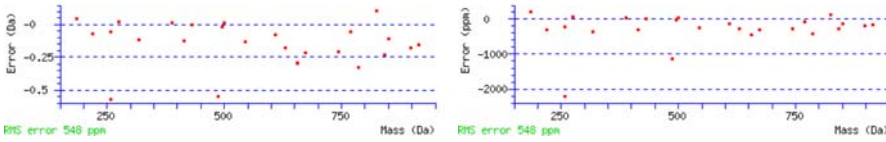

NCBI BLAST search of [AMVNLQIQK](#)  
 (Parameters: blast, nr protein database, expect=20000, no filter, PAM30)  
 Other BLAST [web gateways](#)

**All matches to this query**

| Score | $M_r(\text{calc})$ : | Delta   | Sequence                  |
|-------|----------------------|---------|---------------------------|
| 34.7  | 1059.5746            | -0.0005 | <a href="#">AMVNLQIQK</a> |
| 3.3   | 1059.5746            | -0.0005 | <a href="#">SPMQNVLKK</a> |

Mascot: <http://www.matrixscience.com/>

**Mascot Search Results**

**Peptide View**

MS/MS Fragmentation of **TGQAAGFSYTDANK**  
 Found in **CYC\_MOUSE**, Cytochrome c, somatic OS=Mus musculus GN=Cyccs PE=1 SV=2 (sp) (P62897)

Match to Query 598: 1429.647924 from(715.831238,2+)  
 Title: Arrell12300884 scan 560 560 (Arrell12300884.560.560.2.dta)  
 Data file Arrell12300884.mgf

Click mouse within plot area to zoom in by factor of two about that point  
 Or, Plot from 200 to 1400 Da Full range

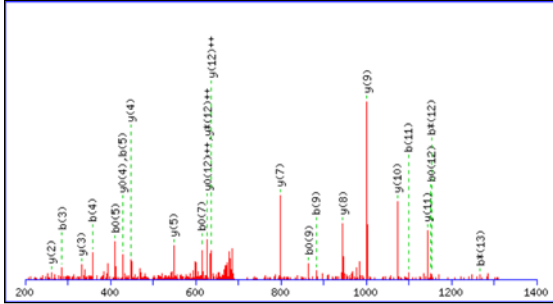

Monoisotopic mass of neutral peptide Mr(calc): 1429.6474  
 Ions Score: 56 Expect: 0.00016  
 Matches (Bold Red): 24/146 fragment ions using 41 most intense peaks

| #  | b                | b <sup>++</sup> | b*               | b <sup>*++</sup> | b <sup>0</sup>   | b <sup>0++</sup> | Seq.     | y                | y <sup>++</sup> | y*        | y <sup>*++</sup> | y <sup>0</sup>  | y <sup>0++</sup> | #         |
|----|------------------|-----------------|------------------|------------------|------------------|------------------|----------|------------------|-----------------|-----------|------------------|-----------------|------------------|-----------|
| 1  | 102.0550         | 51.5311         |                  |                  | 84.0444          | 42.5258          | <b>T</b> |                  |                 |           |                  |                 |                  | <b>14</b> |
| 2  | 159.0764         | 80.0418         |                  |                  | 141.0659         | 71.0366          | <b>G</b> | 1329.6070        | 665.3071        | 1312.5804 | 656.7938         | 1311.5964       | 656.3018         | <b>13</b> |
| 3  | <b>287.1350</b>  | 144.0711        | 270.1084         | 135.5579         | 269.1244         | 135.0659         | <b>Q</b> | 1272.5855        | <b>636.7964</b> | 1255.5590 | <b>628.2831</b>  | 1254.5749       | <b>627.7911</b>  | <b>12</b> |
| 4  | <b>358.1721</b>  | 179.5897        | 341.1456         | 171.0764         | 340.1615         | 170.5844         | <b>A</b> | <b>1144.5269</b> | 572.7671        | 1127.5004 | 564.2538         | 1126.5164       | 563.7618         | <b>11</b> |
| 5  | <b>429.2092</b>  | 215.1083        | 412.1827         | 206.5950         | <b>411.1987</b>  | 206.1030         | <b>A</b> | <b>1073.4898</b> | 537.2485        | 1056.4633 | 528.7353         | 1055.4793       | 528.2433         | <b>10</b> |
| 6  | 486.2307         | 243.6190        | 469.2041         | 235.1057         | 468.2201         | 234.6137         | <b>G</b> | <b>1002.4527</b> | 501.7300        | 985.4262  | 493.2167         | 984.4421        | 492.7247         | <b>9</b>  |
| 7  | 633.2991         | 317.1532        | 616.2726         | 308.6399         | <b>615.2885</b>  | 308.1479         | <b>F</b> | <b>945.4312</b>  | 473.2193        | 928.4047  | 464.7060         | 927.4207        | 464.2140         | <b>8</b>  |
| 8  | 720.3311         | 360.6692        | 703.3046         | 352.1559         | 702.3206         | 351.6639         | <b>S</b> | <b>798.3628</b>  | 399.6851        | 781.3363  | 391.1718         | 780.3523        | 390.6798         | <b>7</b>  |
| 9  | <b>883.3945</b>  | 442.2009        | 866.3679         | 433.6876         | <b>865.3839</b>  | 433.1956         | <b>Y</b> | 711.3308         | 356.1690        | 694.3042  | 347.6558         | 693.3202        | 347.1638         | <b>6</b>  |
| 10 | 984.4421         | 492.7247        | 967.4156         | 484.2114         | 966.4316         | 483.7194         | <b>T</b> | <b>548.2675</b>  | 274.6374        | 531.2409  | 266.1241         | 530.2569        | 265.6321         | <b>5</b>  |
| 11 | <b>1099.4691</b> | 550.2382        | 1082.4425        | 541.7249         | 1081.4585        | 541.2329         | <b>D</b> | <b>447.2198</b>  | 224.1135        | 430.1932  | 215.6003         | <b>429.2092</b> | 215.1082         | <b>4</b>  |
| 12 | 1170.5062        | 585.7567        | <b>1153.4796</b> | 577.2435         | <b>1152.4956</b> | 576.7515         | <b>A</b> | <b>332.1928</b>  | 166.6001        | 315.1663  | 158.0868         |                 |                  | <b>3</b>  |
| 13 | 1284.5491        | 642.7782        | <b>1267.5226</b> | 634.2649         | 1266.5386        | 633.7729         | <b>N</b> | <b>261.1557</b>  | 131.0815        | 244.1292  | 122.5682         |                 |                  | <b>2</b>  |
| 14 |                  |                 |                  |                  |                  |                  | <b>K</b> | 147.1128         | 74.0600         | 130.0863  | 65.5468          |                 |                  | <b>1</b>  |

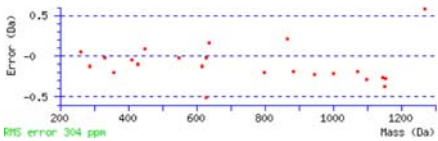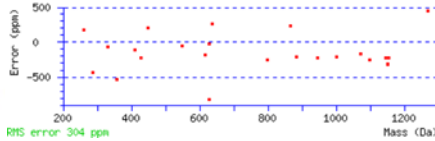

NCBI BLAST search of **TGQAAGFSYTDANK**  
 (Parameters: blastp, nr protein database, expect=20000, no filter, PAM30)  
 Other BLAST [web gateways](#)

**All matches to this query**

| Score | Mr(calc): | Delta   | Sequence                       |
|-------|-----------|---------|--------------------------------|
| 55.6  | 1429.6474 | 0.0006  | <a href="#">TGQAAGFSYTDANK</a> |
| 12.9  | 1428.6490 | 0.9989  | <a href="#">GPVCAGETPPVSCR</a> |
| 2.2   | 1429.6482 | -0.0003 | <a href="#">AIFDDRFVCCNK</a>   |
| 0.7   | 1429.6404 | 0.0076  | <a href="#">FMKVAEMGMPNK</a>   |

Mascot: <http://www.matrixscience.com/>
