# Supplementary material
Source: PubMed Central journal article supplement (PMC3129996)
Supplement: NIHMS301784-supplement-Supplemental_Table_S3.pdf [file NIHMS301784-supplement-Supplemental_Table_S3.pdf]

**Supplementary Table S3 – MS/MS spectra of proteins identified by a single peptide match in Control *versus* ES(+) analysis**

Proteins identified by single peptide matches required identity or extensive homology, and were considered matches when the MS/MS spectrum was of good quality with matching fragment ions above baseline noise, continuity in b- or y-ion series, and fragmentation at proline residues yielding intense y-ions.

**MASCOT** **SCIENCE** Mascot Search Results

Peptide View

MS/MS Fragmentation of **LLELQSIGTNNFLR**

Found in **LETMI\_MOUSE**, Leucine zipper-EF-hand-containing transmembrane protein 1, mitochondrial precursor - Mus musculus (Mouse) (Q9Z2I0)

Match to Query 1207: 1616.892184 from(809.453368,2+)

Title: Arrell01090904 scan 2105 2105 (Arrell01090904.2105.2105.2.dta)

Data file Arrell01090904.mgf

Click mouse within plot area to zoom in by factor of two about that point

Or, Plot from 200 to 1600 Da Full range

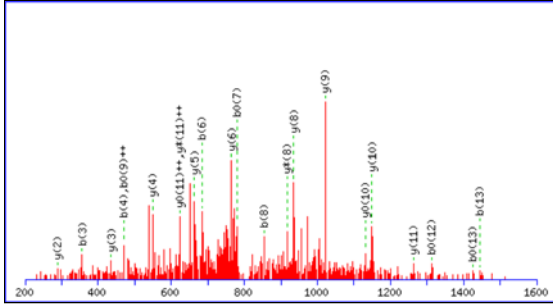

Monoisotopic mass of neutral peptide Mr(calc): 1616.8886

Ions Score: 47 Expect: 8.5e-05

Matches (Bold Red): 22/134 fragment ions using 46 most intense peaks

| #  | b                | b <sup>++</sup> | b <sup>*</sup> | b <sup>*++</sup> | b <sup>0</sup>   | b <sup>0++</sup> | Seq. | y                | y <sup>++</sup> | y <sup>*</sup>  | y <sup>*++</sup> | y <sup>0</sup>   | y <sup>0++</sup> | #  |
|----|------------------|-----------------|----------------|------------------|------------------|------------------|------|------------------|-----------------|-----------------|------------------|------------------|------------------|----|
| 1  | 114.0913         | 57.5493         |                |                  |                  |                  | L    |                  |                 |                 |                  |                  |                  | 14 |
| 2  | 227.1754         | 114.0913        |                |                  |                  |                  | L    | 1504.8118        | 752.9095        | 1487.7853       | 744.3963         | 1486.8013        | 743.9043         | 13 |
| 3  | <b>356.2180</b>  | 178.6126        |                |                  | 338.2074         | 169.6074         | E    | 1391.7278        | 696.3675        | 1374.7012       | 687.8542         | 1373.7172        | 687.3622         | 12 |
| 4  | <b>469.3021</b>  | 235.1547        |                |                  | 451.2915         | 226.1494         | L    | <b>1262.6852</b> | 631.8462        | 1245.6586       | <b>623.3329</b>  | 1244.6746        | <b>622.8409</b>  | 11 |
| 5  | 597.3606         | 299.1840        | 580.3341       | 290.6707         | 579.3501         | 290.1787         | Q    | <b>1149.6011</b> | 575.3042        | 1132.5745       | 566.7909         | <b>1131.5905</b> | 566.2989         | 10 |
| 6  | <b>684.3927</b>  | 342.7000        | 667.3661       | 334.1867         | 666.3821         | 333.6947         | S    | <b>1021.5425</b> | 511.2749        | 1004.5160       | 502.7616         | 1003.5320        | 502.2696         | 9  |
| 7  | 797.4767         | 399.2420        | 780.4502       | 390.7287         | <b>779.4662</b>  | 390.2367         | I    | <b>934.5105</b>  | 467.7589        | <b>917.4839</b> | 459.2456         | 916.4999         | 458.7536         | 8  |
| 8  | <b>854.4982</b>  | 427.7527        | 837.4716       | 419.2395         | 836.4876         | 418.7475         | G    | 821.4264         | 411.2169        | 804.3999        | 402.7036         | 803.4159         | 402.2116         | 7  |
| 9  | 955.5459         | 478.2766        | 938.5193       | 469.7633         | 937.5353         | <b>469.2713</b>  | T    | <b>764.4050</b>  | 382.7061        | 747.3784        | 374.1928         | 746.3944         | 373.7008         | 6  |
| 10 | 1069.5888        | 535.2980        | 1052.5623      | 526.7848         | 1051.5782        | 526.2928         | N    | <b>663.3573</b>  | 332.1823        | 646.3307        | 323.6690         |                  |                  | 5  |
| 11 | 1183.6317        | 592.3195        | 1166.6052      | 583.8062         | 1165.6212        | 583.3142         | N    | <b>549.3144</b>  | 275.1608        | 532.2878        | 266.6475         |                  |                  | 4  |
| 12 | 1330.7001        | 665.8537        | 1313.6736      | 657.3404         | <b>1312.6896</b> | 656.8484         | F    | <b>435.2714</b>  | 218.1394        | 418.2449        | 209.6261         |                  |                  | 3  |
| 13 | <b>1443.7842</b> | 722.3957        | 1426.7577      | 713.8825         | <b>1425.7736</b> | 713.3905         | L    | <b>288.2030</b>  | 144.6051        | 271.1765        | 136.0919         |                  |                  | 2  |
| 14 |                  |                 |                |                  |                  |                  | R    | 175.1190         | 88.0631         | 158.0924        | 79.5498          |                  |                  | 1  |

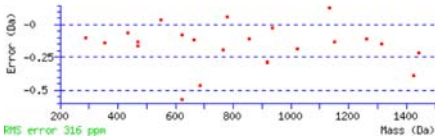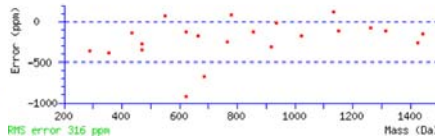

NCBI BLAST search of **LLELQSIGTNNFLR**

(Parameters: blastp, nr protein database, expect=20000, no filter, PAM30)

Other BLAST [web gateways](#)

All matches to this query

| Score | Mr(calc): | Delta  | Sequence                       |
|-------|-----------|--------|--------------------------------|
| 46.8  | 1616.8886 | 0.0036 | <a href="#">LLELQSIGTNNFLR</a> |

Mascot: <http://www.matrixscience.com/>

**MASCOT** **SCIENCE** Mascot Search Results

Peptide View

MS/MS Fragmentation of **QDFVDLQGQLR**

Found in **CACP\_MOUSE**, Carnitine O-acetyltransferase OS=Mus musculus GN=Crat PE=1 SV=2 (sp) (P47934)

Match to Query 1090: 1317.667574 from(659.841063,2+)

Title: Arrell01090905 scan 1444 1444 (Arrell01090905.1444.1444.2.dta)

Data file Arrell01090905.mgf

Click mouse within plot area to zoom in by factor of two about that point

Or, Plot from 100 to 1200 Da Full range

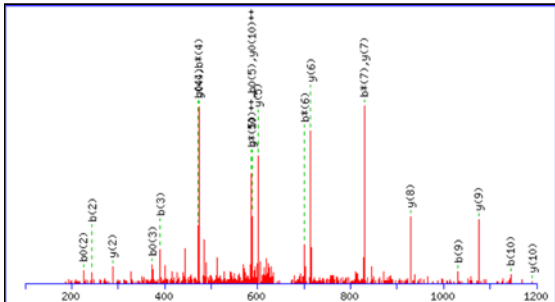

Monoisotopic mass of neutral peptide Mr(calc): 1317.6677

Ions Score: 71 Expect: 1.2e-05

Matches (Bold Red): 22/106 Fragment ions using 28 most intense peaks

| #  | b                | b <sup>++</sup> | b*              | b <sup>*++</sup> | b <sup>0</sup>  | b <sup>0++</sup> | Seq.     | y                | y <sup>++</sup> | y*        | y <sup>*++</sup> | y <sup>0</sup> | y <sup>0++</sup> | #         |
|----|------------------|-----------------|-----------------|------------------|-----------------|------------------|----------|------------------|-----------------|-----------|------------------|----------------|------------------|-----------|
| 1  | 129.0659         | 65.0366         | 112.0393        | 56.5233          |                 |                  | <b>Q</b> |                  |                 |           |                  |                |                  | <b>11</b> |
| 2  | <b>244.0928</b>  | 122.5500        | 227.0662        | 114.0368         | <b>226.0822</b> | 113.5448         | <b>D</b> | <b>1190.6164</b> | 595.8118        | 1173.5899 | <b>587.2986</b>  | 1172.6058      | <b>586.8066</b>  | <b>10</b> |
| 3  | <b>391.1612</b>  | 196.0842        | 374.1347        | 187.5710         | <b>373.1506</b> | 187.0790         | <b>F</b> | <b>1075.5895</b> | 538.2984        | 1058.5629 | 529.7851         | 1057.5789      | 529.2931         | <b>9</b>  |
| 4  | 490.2296         | 245.6185        | <b>473.2031</b> | 237.1052         | <b>472.2191</b> | 236.6132         | <b>V</b> | <b>928.5211</b>  | 464.7642        | 911.4945  | 456.2509         | 910.5105       | 455.7589         | <b>8</b>  |
| 5  | 605.2566         | 303.1319        | <b>588.2300</b> | 294.6186         | <b>587.2460</b> | 294.1266         | <b>D</b> | <b>829.4526</b>  | 415.2300        | 812.4261  | 406.7167         | 811.4421       | 406.2247         | <b>7</b>  |
| 6  | 718.3406         | 359.6740        | <b>701.3141</b> | 351.1607         | 700.3301        | 350.6687         | <b>L</b> | <b>714.4257</b>  | 357.7165        | 697.3992  | 349.2032         |                |                  | <b>6</b>  |
| 7  | 846.3992         | 423.7032        | <b>829.3727</b> | 415.1900         | 828.3886        | 414.6980         | <b>Q</b> | <b>601.3416</b>  | 301.1745        | 584.3151  | 292.6612         |                |                  | <b>5</b>  |
| 8  | 903.4207         | 452.2140        | 886.3941        | 443.7007         | 885.4101        | 443.2087         | <b>G</b> | <b>473.2831</b>  | 237.1452        | 456.2565  | 228.6319         |                |                  | <b>4</b>  |
| 9  | <b>1031.4793</b> | 516.2433        | 1014.4527       | 507.7300         | 1013.4687       | 507.2380         | <b>Q</b> | 416.2616         | 208.6344        | 399.2350  | 200.1212         |                |                  | <b>3</b>  |
| 10 | <b>1144.5633</b> | 572.7853        | 1127.5368       | 564.2720         | 1126.5528       | 563.7800         | <b>L</b> | <b>288.2030</b>  | 144.6051        | 271.1765  | 136.0919         |                |                  | <b>2</b>  |
| 11 |                  |                 |                 |                  |                 |                  | <b>R</b> | 175.1190         | 88.0631         | 158.0924  | 79.5498          |                |                  | <b>1</b>  |

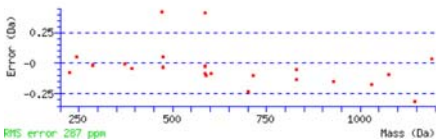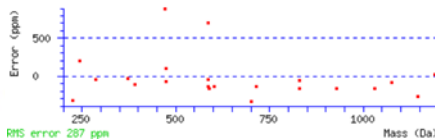

NCBI BLAST search of **QDFVDLQGQLR**

(Parameters: blastp, nr protein database, expect=20000, no filter, PAM30)

Other BLAST [web gateways](#)

All matches to this query

| Score | Mr(calc): | Delta   | Sequence                      |
|-------|-----------|---------|-------------------------------|
| 70.9  | 1317.6677 | -0.0002 | <a href="#">QDFVDLQGQLR</a>   |
| 11.8  | 1317.6639 | 0.0037  | <a href="#">MGILDIEVWGK</a>   |
| 9.8   | 1317.6711 | -0.0035 | <a href="#">AGLETMDKAVQR</a>  |
| 9.4   | 1317.6686 | -0.0010 | <a href="#">CLLAWMQQGLR</a>   |
| 9.1   | 1317.6599 | 0.0077  | <a href="#">MDDQLDAGVKVK</a>  |
| 8.5   | 1317.6645 | 0.0031  | <a href="#">MAASAARGAMALR</a> |
| 8.0   | 1317.6677 | -0.0001 | <a href="#">IDFGGKPKDEGR</a>  |
| 7.5   | 1317.6664 | 0.0012  | <a href="#">VESGIVEETLDK</a>  |
| 7.2   | 1316.6619 | 1.0057  | <a href="#">GVAESCLQRAAR</a>  |
| 6.9   | 1317.6711 | -0.0035 | <a href="#">KPNMTNQVTAAR</a>  |

Mascot: <http://www.matrixscience.com/>

**MASCOT** (SCIENCE) **Mascot Search Results**

**Peptide View**

MS/MS Fragmentation of **LGFGVVQEISFGTTK**

Found in **TCEP\_MOUSE**, T-complex protein 1 subunit epsilon (TCP-1-epsilon) (CCT-epsilon) - Mus musculus (Mouse) (P80316)

Match to Query 1295: 1652.880834 from(827.447693,2+)

Title: Arrell01090907 scan 2181 2181 (Arrell01090907.2181.2181.2.dta)

Data file Arrell01090907.mgf

Click mouse within plot area to zoom in by factor of two about that point

Or, Plot from 200 to 1700 Da **Full range**

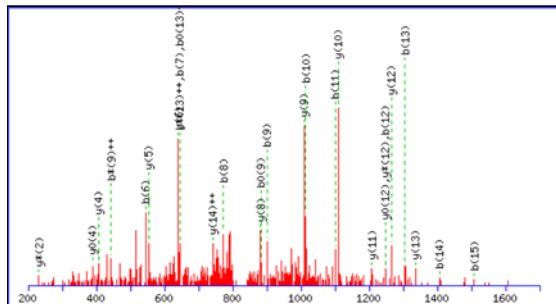

Monoisotopic mass of neutral peptide Mr(calc): 1652.8774

Ions Score: 65 Expect: 5.6e-06

Matches (Bold Red): 28/148 fragment ions using 49 most intense peaks

| #  | b                | b <sup>++</sup> | b*        | b <sup>*++</sup> | b <sup>0</sup>  | b <sup>0++</sup> | Seq. | y                | y <sup>++</sup> | y*               | y <sup>*++</sup> | y <sup>0</sup>   | y <sup>0++</sup> | #  |
|----|------------------|-----------------|-----------|------------------|-----------------|------------------|------|------------------|-----------------|------------------|------------------|------------------|------------------|----|
| 1  | 114.0913         | 57.5493         |           |                  |                 |                  | L    |                  |                 |                  |                  |                  |                  | 16 |
| 2  | 171.1128         | 86.0600         |           |                  |                 |                  | G    | 1540.8006        | 770.9039        | 1523.7740        | 762.3907         | 1522.7900        | 761.8986         | 15 |
| 3  | 318.1812         | 159.5942        |           |                  |                 |                  | F    | 1483.7791        | <b>742.3932</b> | 1466.7526        | 733.8799         | 1465.7686        | 733.3879         | 14 |
| 4  | 389.2183         | 195.1128        |           |                  |                 |                  | A    | <b>1336.7107</b> | 668.8590        | 1319.6842        | 660.3457         | 1318.7001        | 659.8537         | 13 |
| 5  | 446.2398         | 223.6235        |           |                  |                 |                  | G    | <b>1265.6736</b> | 633.3404        | <b>1248.6470</b> | 624.8272         | <b>1247.6630</b> | 624.3352         | 12 |
| 6  | <b>545.3082</b>  | 273.1577        |           |                  |                 |                  | V    | <b>1208.6521</b> | 604.8297        | 1191.6256        | 596.3164         | 1190.6416        | 595.8244         | 11 |
| 7  | <b>644.3766</b>  | 322.6920        |           |                  |                 |                  | V    | <b>1109.5837</b> | 555.2955        | 1092.5572        | 546.7822         | 1091.5732        | 546.2902         | 10 |
| 8  | <b>772.4352</b>  | 386.7212        | 755.4087  | 378.2080         |                 |                  | Q    | <b>1010.5153</b> | 505.7613        | 993.4888         | 497.2480         | 992.5047         | 496.7560         | 9  |
| 9  | <b>901.4778</b>  | 451.2425        | 884.4512  | <b>442.7293</b>  | <b>883.4672</b> | 442.2373         | E    | <b>882.4567</b>  | 441.7320        | 865.4302         | 433.2187         | 864.4462         | 432.7267         | 8  |
| 10 | <b>1014.5619</b> | 507.7846        | 997.5353  | 499.2713         | 996.5513        | 498.7793         | I    | 753.4141         | 377.2107        | 736.3876         | 368.6974         | 735.4036         | 368.2054         | 7  |
| 11 | <b>1101.5939</b> | 551.3006        | 1084.5673 | 542.7873         | 1083.5833       | 542.2953         | S    | <b>640.3301</b>  | 320.6687        | 623.3035         | 312.1554         | 622.3195         | 311.6634         | 6  |
| 12 | <b>1248.6623</b> | 624.8348        | 1231.6358 | 616.3215         | 1230.6517       | 615.8295         | F    | <b>553.2980</b>  | 277.1527        | 536.2715         | 268.6394         | 535.2875         | 268.1474         | 5  |
| 13 | <b>1305.6838</b> | 653.3455        | 1288.6572 | <b>644.8322</b>  | 1287.6732       | <b>644.3402</b>  | G    | <b>406.2296</b>  | 203.6185        | 389.2031         | 195.1052         | <b>388.2191</b>  | 194.6132         | 4  |
| 14 | <b>1406.7314</b> | 703.8694        | 1389.7049 | 695.3561         | 1388.7209       | 694.8641         | T    | 349.2082         | 175.1077        | 332.1816         | 166.5944         | 331.1976         | 166.1024         | 3  |
| 15 | <b>1507.7791</b> | 754.3932        | 1490.7526 | 745.8799         | 1489.7686       | 745.3879         | T    | 248.1605         | 124.5839        | <b>231.1339</b>  | 116.0706         | 230.1499         | 115.5786         | 2  |
| 16 |                  |                 |           |                  |                 |                  | K    | 147.1128         | 74.0600         | 130.0863         | 65.5468          |                  |                  | 1  |

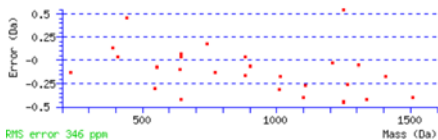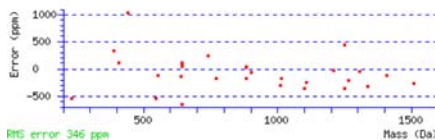

NCBI BLAST search of **LGFGVVQEISFGTTK**

(Parameters: blastp, nr protein database, expect=20000, no filter, PAM30)

Other BLAST [web gateways](#)

All matches to this query

| Score | Mr(calc): | Delta   | Sequence                        |
|-------|-----------|---------|---------------------------------|
| 64.7  | 1652.8774 | 0.0034  | <a href="#">LGFGVVQEISFGTTK</a> |
| 1.2   | 1652.8847 | -0.0039 | <a href="#">MKLPIFIADAFTTK</a>  |

Mascot: <http://www.matrixscience.com/>

**Mascot Search Results**

**Peptide View**

MS/MS Fragmentation of **GETLGHGLGR**  
 Found in **CTBP1\_MOUSE**, C-terminal-binding protein 1 (EC 1.1.1.-) (CTBP1) - Mus musculus (Mouse) (O88712)

Match to Query 653: 1084.624244 from(543.319398,2+)  
 Title: Arrell01090915 scan 1638 1638 (Arrell01090915.1638.1638.2.dta)  
 Data file Arrell01090915.mgf

Click mouse within plot area to zoom in by factor of two about that point  
 Or, Plot from 150 to 1050 Da Full range

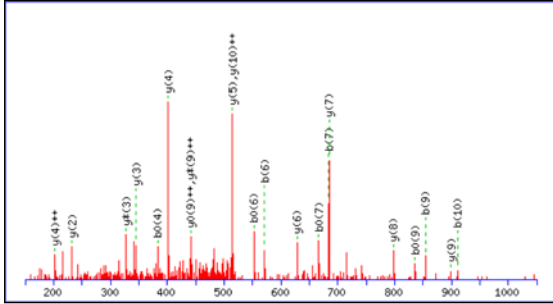

Monoisotopic mass of neutral peptide Mr(calc): 1084.6241  
 Ions Score: 64 Expect: 8e-06  
 Matches (Bold Red): 21/82 fragment ions using 28 most intense peaks

| #  | b               | b <sup>++</sup> | b <sup>0</sup>  | b <sup>0++</sup> | Seq.     | y               | y <sup>++</sup> | y*              | y <sup>++</sup> | y <sup>0</sup> | y <sup>0++</sup> | #         |
|----|-----------------|-----------------|-----------------|------------------|----------|-----------------|-----------------|-----------------|-----------------|----------------|------------------|-----------|
| 1  | 58.0287         | 29.5180         |                 |                  | <b>G</b> |                 |                 |                 |                 |                |                  | <b>11</b> |
| 2  | 187.0713        | 94.0393         | 169.0608        | 85.0340          | <b>E</b> | 1028.6099       | <b>514.8086</b> | 1011.5833       | 506.2953        | 1010.5993      | 505.8033         | <b>10</b> |
| 3  | 288.1190        | 144.5631        | 270.1084        | 135.5579         | <b>T</b> | <b>899.5673</b> | 450.2873        | 882.5407        | <b>441.7740</b> | 881.5567       | <b>441.2820</b>  | <b>9</b>  |
| 4  | 401.2031        | 201.1052        | <b>383.1925</b> | 192.0999         | <b>L</b> | <b>798.5196</b> | 399.7634        | 781.4931        | 391.2502        |                |                  | <b>8</b>  |
| 5  | 458.2245        | 229.6159        | 440.2140        | 220.6106         | <b>G</b> | <b>685.4355</b> | 343.2214        | 668.4090        | 334.7081        |                |                  | <b>7</b>  |
| 6  | <b>571.3086</b> | 286.1579        | <b>553.2980</b> | 277.1527         | <b>I</b> | <b>628.4141</b> | 314.7107        | 611.3875        | 306.1974        |                |                  | <b>6</b>  |
| 7  | <b>684.3927</b> | 342.7000        | <b>666.3821</b> | 333.6947         | <b>I</b> | <b>515.3300</b> | 258.1686        | 498.3035        | 249.6554        |                |                  | <b>5</b>  |
| 8  | 741.4141        | 371.2107        | 723.4036        | 362.2054         | <b>G</b> | <b>402.2459</b> | <b>201.6266</b> | 385.2194        | 193.1133        |                |                  | <b>4</b>  |
| 9  | <b>854.4982</b> | 427.7527        | <b>836.4876</b> | 418.7475         | <b>L</b> | <b>345.2245</b> | 173.1159        | <b>328.1979</b> | 164.6026        |                |                  | <b>3</b>  |
| 10 | <b>911.5197</b> | 456.2635        | 893.5091        | 447.2582         | <b>G</b> | <b>232.1404</b> | 116.5738        | 215.1139        | 108.0606        |                |                  | <b>2</b>  |
| 11 |                 |                 |                 |                  | <b>R</b> | 175.1190        | 88.0631         | 158.0924        | 79.5498         |                |                  | <b>1</b>  |

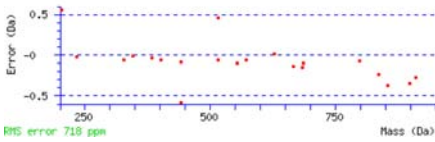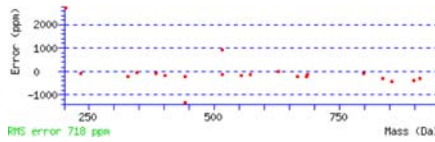

NCBI BLAST search of **GETLGHGLGR**  
 (Parameters: blastp, nr protein database, expect=20000, no filter, PAM30)  
 Other BLAST [web gateways](#)

**All matches to this query**

| Score | Mr(calc): | Delta   | Sequence                    |
|-------|-----------|---------|-----------------------------|
| 64.5  | 1084.6241 | 0.0002  | <a href="#">GETLGHGLGR</a>  |
| 17.3  | 1084.6240 | 0.0002  | <a href="#">NASLEVALLR</a>  |
| 14.1  | 1084.6240 | 0.0002  | <a href="#">DTILQLNLR</a>   |
| 7.8   | 1084.6215 | 0.0027  | <a href="#">LKCIPLWR</a>    |
| 7.1   | 1084.6240 | 0.0002  | <a href="#">GLAGAVSELLR</a> |
| 6.4   | 1084.6240 | 0.0002  | <a href="#">ALEEKLVGAR</a>  |
| 6.4   | 1084.6175 | 0.0067  | <a href="#">GLRLCTPLGR</a>  |
| 5.7   | 1084.6240 | 0.0002  | <a href="#">AVITANLDIR</a>  |
| 5.6   | 1084.6314 | -0.0072 | <a href="#">GKPMELIIGK</a>  |
| 4.3   | 1084.6240 | 0.0002  | <a href="#">DLASVQALLR</a>  |

Mascot: <http://www.matrixscience.com/>

**MASCOT** **SCIENCE** Mascot Search Results

Peptide View

MS/MS Fragmentation of **ALGFQNVVTIDELR**

Found in **CECR5\_MOUSE**, Cat eye syndrome critical region protein 5 homolog precursor - Mus musculus (Mouse) (Q91WM2)

Match to Query 1121: 1573.850074 from(787.932313,2+)

Title: Arrell01090918 scan 1871 1871 (Arrell01090918.1871.1871.2.dta)

Data file Arrell01090918.mgf

Click mouse within plot area to zoom in by factor of two about that point

Or, Plot from 200 to 1500 Da Full range

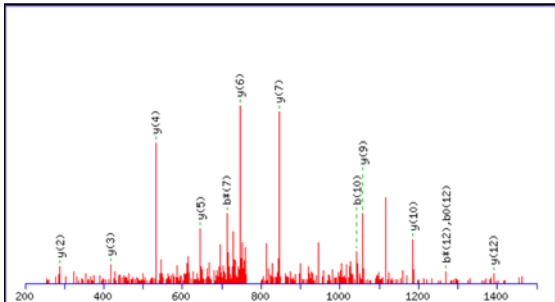

Monoisotopic mass of neutral peptide Mr(calc): 1573.8464

Ions Score: 57 Expect: 4e-05

Matches (Bold Red): 13/128 fragment ions using 18 most intense peaks

| #  | b                | b <sup>++</sup> | b*               | b* <sup>++</sup> | b <sup>0</sup>   | b <sup>0</sup> <sup>++</sup> | Seq. | y                | y <sup>++</sup> | y*        | y* <sup>++</sup> | y <sup>0</sup> | y <sup>0</sup> <sup>++</sup> | #  |
|----|------------------|-----------------|------------------|------------------|------------------|------------------------------|------|------------------|-----------------|-----------|------------------|----------------|------------------------------|----|
| 1  | 72.0444          | 36.5258         |                  |                  |                  |                              | A    |                  |                 |           |                  |                |                              | 14 |
| 2  | 185.1285         | 93.0679         |                  |                  |                  |                              | L    | 1503.8166        | 752.4119        | 1486.7900 | 743.8986         | 1485.8060      | 743.4066                     | 13 |
| 3  | 242.1499         | 121.5786        |                  |                  |                  |                              | G    | <b>1390.7325</b> | 695.8699        | 1373.7060 | 687.3566         | 1372.7219      | 686.8646                     | 12 |
| 4  | 389.2183         | 195.1128        |                  |                  |                  |                              | F    | 1333.7110        | 667.3592        | 1316.6845 | 658.8459         | 1315.7005      | 658.3539                     | 11 |
| 5  | 517.2769         | 259.1421        | 500.2504         | 250.6288         |                  |                              | Q    | <b>1186.6426</b> | 593.8250        | 1169.6161 | 585.3117         | 1168.6321      | 584.8197                     | 10 |
| 6  | 631.3198         | 316.1636        | 614.2933         | 307.6503         |                  |                              | N    | <b>1058.5840</b> | 529.7957        | 1041.5575 | 521.2824         | 1040.5735      | 520.7904                     | 9  |
| 7  | 730.3883         | 365.6978        | <b>713.3617</b>  | 357.1845         |                  |                              | V    | 944.5411         | 472.7742        | 927.5146  | 464.2609         | 926.5306       | 463.7689                     | 8  |
| 8  | 829.4567         | 415.2320        | 812.4301         | 406.7187         |                  |                              | V    | <b>845.4727</b>  | 423.2400        | 828.4462  | 414.7267         | 827.4621       | 414.2347                     | 7  |
| 9  | 930.5043         | 465.7558        | 913.4778         | 457.2425         | 912.4938         | 456.7505                     | T    | <b>746.4043</b>  | 373.7058        | 729.3777  | 365.1925         | 728.3937       | 364.7005                     | 6  |
| 10 | <b>1043.5884</b> | 522.2978        | 1026.5619        | 513.7846         | 1025.5778        | 513.2926                     | I    | <b>645.3566</b>  | 323.1819        | 628.3301  | 314.6687         | 627.3461       | 314.1767                     | 5  |
| 11 | 1158.6154        | 579.8113        | 1141.5888        | 571.2980         | 1140.6048        | 570.8060                     | D    | <b>532.2726</b>  | 266.6399        | 515.2460  | 258.1266         | 514.2620       | 257.6346                     | 4  |
| 12 | 1287.6579        | 644.3326        | <b>1270.6314</b> | 635.8193         | <b>1269.6474</b> | 635.3273                     | E    | <b>417.2456</b>  | 209.1264        | 400.2191  | 200.6132         | 399.2350       | 200.1212                     | 3  |
| 13 | 1400.7420        | 700.8746        | 1383.7155        | 692.3614         | 1382.7314        | 691.8694                     | L    | <b>288.2030</b>  | 144.6051        | 271.1765  | 136.0919         |                |                              | 2  |
| 14 |                  |                 |                  |                  |                  |                              | R    | 175.1190         | 88.0631         | 158.0924  | 79.5498          |                |                              | 1  |

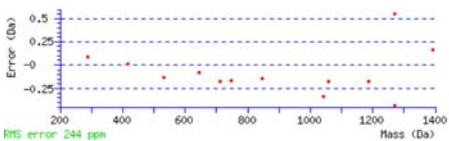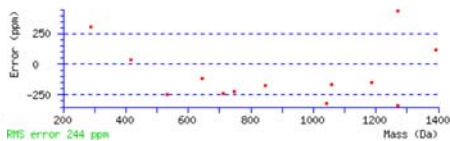

NCBI BLAST search of **ALGFQNVVTIDELR**

(Parameters: blastp, nr protein database, expect=20000, no filter, PAM30)

Other BLAST [web gateways](#)

All matches to this query

| Score | Mr(calc): | Delta   | Sequence                       |
|-------|-----------|---------|--------------------------------|
| 56.7  | 1573.8464 | 0.0037  | <a href="#">ALGFQNVVTIDELR</a> |
| 0.5   | 1573.8563 | -0.0062 | <a href="#">TDDAEISIKQLTK</a>  |

Mascot: <http://www.matrixscience.com/>

**MASCOT** (SCIENCE) **Mascot Search Results**

**Peptide View**

MS/MS Fragmentation of **TNQELQEINR**

Found in **ANXA2\_MOUSE**, Annexin A2 (Annexin-2) (Annexin II) (Lipocortin II) (Calpactin I heavy chain) (Chromobindin-8) (p36) (Protein I) (Placental anticoagulant protein IV) (PAP-IV) - Mus musculus (Mouse) (P07356)

Match to Query 811: 1243.615814 from(622.815183,2+)

Title: Arrell01100927\_scan\_576\_576 (Arrell01100927.576.576.2.dta)

Data file Arrell01100927.mgf

Click mouse within plot area to zoom in by factor of two about that point

Or, Plot from 150 to 1200 Da

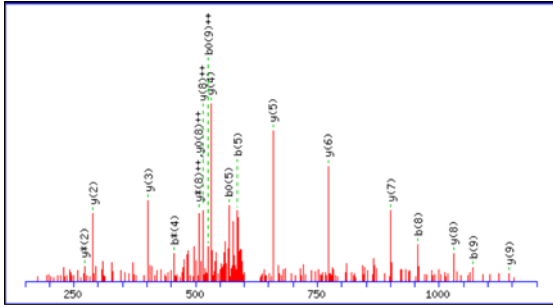

Monoisotopic mass of neutral peptide  $M_r(\text{calc})$ : 1243.6156

Ions Score: 63 Expect: 1.5e-05

Matches (Bold Red): 18/100 fragment ions using 25 most intense peaks

| #  | b                | b <sup>++</sup> | b*              | b <sup>*++</sup> | b <sup>0</sup>  | b <sup>0++</sup> | Seq. | y                | y <sup>++</sup> | y*              | y <sup>*++</sup> | y <sup>0</sup> | y <sup>0++</sup> | #  |
|----|------------------|-----------------|-----------------|------------------|-----------------|------------------|------|------------------|-----------------|-----------------|------------------|----------------|------------------|----|
| 1  | 102.0550         | 51.5311         |                 |                  | 84.0444         | 42.5258          | T    |                  |                 |                 |                  |                |                  | 10 |
| 2  | 216.0979         | 108.5526        | 199.0713        | 100.0393         | 198.0873        | 99.5473          | N    | <b>1143.5753</b> | 572.2913        | 1126.5487       | 563.7780         | 1125.5647      | 563.2860         | 9  |
| 3  | 344.1565         | 172.5819        | 327.1299        | 164.0686         | 326.1459        | 163.5766         | Q    | <b>1029.5323</b> | <b>515.2698</b> | 1012.5058       | <b>506.7565</b>  | 1011.5218      | <b>506.2645</b>  | 8  |
| 4  | 473.1991         | 237.1032        | <b>456.1725</b> | 228.5899         | 455.1885        | 228.0979         | E    | <b>901.4738</b>  | 451.2405        | 884.4472        | 442.7272         | 883.4632       | 442.2352         | 7  |
| 5  | <b>586.2831</b>  | 293.6452        | 569.2566        | 285.1319         | <b>568.2726</b> | 284.6399         | L    | <b>772.4312</b>  | 386.7192        | 755.4046        | 378.2060         | 754.4206       | 377.7139         | 6  |
| 6  | 714.3417         | 357.6745        | 697.3151        | 349.1612         | 696.3311        | 348.6692         | Q    | <b>659.3471</b>  | 330.1772        | 642.3206        | 321.6639         | 641.3365       | 321.1719         | 5  |
| 7  | 843.3843         | 422.1958        | 826.3577        | 413.6825         | 825.3737        | 413.1905         | E    | <b>531.2885</b>  | 266.1479        | 514.2620        | 257.6346         | 513.2780       | 257.1426         | 4  |
| 8  | <b>956.4684</b>  | 478.7378        | 939.4418        | 470.2245         | 938.4578        | 469.7325         | I    | <b>402.2459</b>  | 201.6266        | 385.2194        | 193.1133         |                |                  | 3  |
| 9  | <b>1070.5113</b> | 535.7593        | 1053.4847       | 527.2460         | 1052.5007       | <b>526.7540</b>  | N    | <b>289.1619</b>  | 145.0846        | <b>272.1353</b> | 136.5713         |                |                  | 2  |
| 10 |                  |                 |                 |                  |                 |                  | R    | 175.1190         | 88.0631         | 158.0924        | 79.5498          |                |                  | 1  |

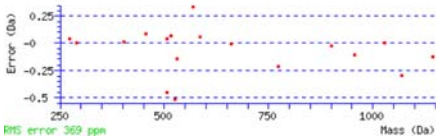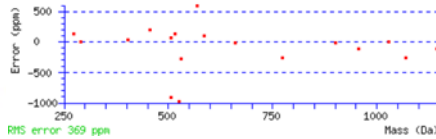

NCBI BLAST search of **TNQELQEINR**  
(Parameters: blastp, nr protein database, expect=20000, no filter, PAM30)

Other BLAST [web gateways](#)

**All matches to this query**

| Score | $M_r(\text{calc})$ : | Delta   | Sequence                     |
|-------|----------------------|---------|------------------------------|
| 63.4  | 1243.6156            | 0.0002  | <a href="#">TNQELQEINR</a>   |
| 10.9  | 1243.6156            | 0.0002  | <a href="#">EKAEGDAAALNR</a> |
| 7.2   | 1243.6231            | -0.0072 | <a href="#">TQMAEVLPSPR</a>  |
| 2.4   | 1243.6244            | -0.0086 | <a href="#">GHIQMFERAR</a>   |
| 1.6   | 1242.6204            | 0.9954  | <a href="#">LENDQIENLR</a>   |
| 1.5   | 1242.6105            | 1.0053  | <a href="#">RWEQLDPSGR</a>   |

Mascot: <http://www.matrixscience.com/>

**MASCOT** **SCIENCE** Mascot Search Results

Peptide View

MS/MS Fragmentation of **EKEESYDLILSR**

Found in **GSTA4\_MOUSE**, Glutathione S-transferase A4 (EC 2.5.1.18) (GST A4-4) (GSTA4-4) (Glutathione S-transferase 5.7) (GST 5.7) (GST class-alpha member 4) - Mus musculus (Mouse) (P24472)

Match to Query 1025: 1480.743744 from(741.379148,2+)

Title: Arrell01100938 scan 1096 1096 (Arrell01100938.1096.1096.2.dta)

Data file Arrell01100938.mgf

Click mouse within plot area to zoom in by factor of two about that point

Or, Plot from 200 to 1400 Da Full range

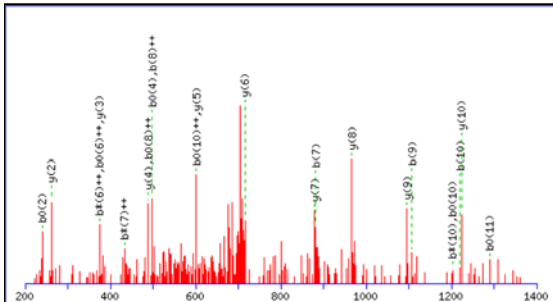

Monoisotopic mass of neutral peptide Mr(calc): 1480.7409

Ions Score: 50 Expect: 0.0003

Matches (Bold Red): 23/128 fragment ions using 39 most intense peaks

| #  | b                | b <sup>++</sup> | b <sup>*</sup>   | b <sup>*++</sup> | b <sup>0</sup>   | b <sup>0++</sup> | Seq.     | y                | y <sup>++</sup> | y <sup>*</sup> | y <sup>*++</sup> | y <sup>0</sup> | y <sup>0++</sup> | #         |
|----|------------------|-----------------|------------------|------------------|------------------|------------------|----------|------------------|-----------------|----------------|------------------|----------------|------------------|-----------|
| 1  | 130.0499         | 65.5286         |                  |                  | 112.0393         | 56.5233          | <b>E</b> |                  |                 |                |                  |                |                  | <b>12</b> |
| 2  | 258.1448         | 129.5761        | 241.1183         | 121.0628         | <b>240.1343</b>  | 120.5708         | <b>K</b> | 1352.7056        | 676.8564        | 1335.6791      | 668.3432         | 1334.6951      | 667.8512         | <b>11</b> |
| 3  | 387.1874         | 194.0974        | 370.1609         | 185.5841         | 369.1769         | 185.0921         | <b>E</b> | <b>1224.6107</b> | 612.8090        | 1207.5841      | 604.2957         | 1206.6001      | 603.8037         | <b>10</b> |
| 4  | 516.2300         | 258.6186        | 499.2035         | 250.1054         | <b>498.2195</b>  | 249.6134         | <b>E</b> | <b>1095.5681</b> | 548.2877        | 1078.5415      | 539.7744         | 1077.5575      | 539.2824         | <b>9</b>  |
| 5  | 603.2620         | 302.1347        | 586.2355         | 293.6214         | 585.2515         | 293.1294         | <b>S</b> | <b>966.5255</b>  | 483.7664        | 949.4989       | 475.2531         | 948.5149       | 474.7611         | <b>8</b>  |
| 6  | 766.3254         | 383.6663        | 749.2988         | <b>375.1531</b>  | 748.3148         | <b>374.6610</b>  | <b>Y</b> | <b>879.4934</b>  | 440.2504        | 862.4669       | 431.7371         | 861.4829       | 431.2451         | <b>7</b>  |
| 7  | <b>881.3523</b>  | 441.1798        | 864.3258         | <b>432.6665</b>  | 863.3418         | 432.1745         | <b>D</b> | <b>716.4301</b>  | 358.7187        | 699.4036       | 350.2054         | 698.4195       | 349.7134         | <b>6</b>  |
| 8  | 994.4364         | <b>497.7218</b> | 977.4098         | 489.2086         | 976.4258         | <b>488.7165</b>  | <b>L</b> | <b>601.4032</b>  | 301.2052        | 584.3766       | 292.6919         | 583.3926       | 292.1999         | <b>5</b>  |
| 9  | <b>1107.5204</b> | 554.2639        | 1090.4939        | 545.7506         | 1089.5099        | 545.2586         | <b>I</b> | <b>488.3191</b>  | 244.6632        | 471.2926       | 236.1499         | 470.3085       | 235.6579         | <b>4</b>  |
| 10 | <b>1220.6045</b> | 610.8059        | <b>1203.5780</b> | 602.2926         | <b>1202.5939</b> | <b>601.8006</b>  | <b>L</b> | <b>375.2350</b>  | 188.1212        | 358.2085       | 179.6079         | 357.2245       | 179.1159         | <b>3</b>  |
| 11 | 1307.6365        | 654.3219        | 1290.6100        | 645.8086         | <b>1289.6260</b> | 645.3166         | <b>S</b> | <b>262.1510</b>  | 131.5791        | 245.1244       | 123.0659         | 244.1404       | 122.5738         | <b>2</b>  |
| 12 |                  |                 |                  |                  |                  |                  | <b>R</b> | 175.1190         | 88.0631         | 158.0924       | 79.5498          |                |                  | <b>1</b>  |

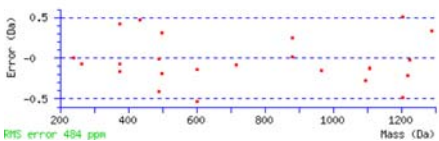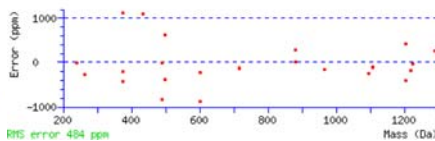

NCBI BLAST search of **EKEESYDLILSR**

(Parameters: blastp, nr protein database, expect=20000, no filter, PAM30)

Other BLAST [web gateways](#)

All matches to this query

| Score | Mr(calc): | Delta  | Sequence                     |
|-------|-----------|--------|------------------------------|
| 49.8  | 1480.7409 | 0.0029 | <a href="#">EKEESYDLILSR</a> |

Mascot: <http://www.matrixscience.com/>



**(MATRIX) (SCIENCE) Mascot Search Results**

**Peptide View**

MS/MS Fragmentation of **LVEEAIQCAEK**

Found in **ECHM\_MOUSE**, Enoyl-CoA hydratase, mitochondrial precursor (EC 4.2.1.17) (Short chain enoyl-CoA hydratase) (SCEH) (Enoyl-CoA hydratase 1) - Mus musculus (Mouse) (Q8BH95)

Match to Query 843: 1288.635964 from(645.325258,2+)

Title: Arrell01100939 scan 711 711 (Arrell01100939.711.711.2.dta)

Data file Arrell01100939.mgf

Click mouse within plot area to zoom in by factor of two about that point

Or, Plot from 100 to 1300 Da **Full range**

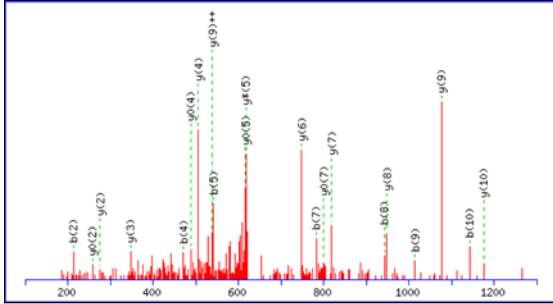

Monoisotopic mass of neutral peptide Mr(calc): 1288.6333

Variable modifications:

C8 : Carbamidomethyl (C)

Ions Score: 55 Expect: 0.00011

Matches (Bold Red): 21/102 fragment ions using 36 most intense peaks

| #  | b                | b <sup>++</sup> | b <sup>*</sup> | b <sup>*++</sup> | b <sup>0</sup> | b <sup>0++</sup> | Seq. | y                | y <sup>++</sup> | y <sup>*</sup>  | y <sup>*++</sup> | y <sup>0</sup>  | y <sup>0++</sup> | #         |
|----|------------------|-----------------|----------------|------------------|----------------|------------------|------|------------------|-----------------|-----------------|------------------|-----------------|------------------|-----------|
| 1  | 114.0913         | 57.5493         |                |                  |                |                  | L    |                  |                 |                 |                  |                 |                  | 11        |
| 2  | <b>213.1598</b>  | 107.0835        |                |                  |                |                  | V    | <b>1176.5565</b> | 588.7819        | 1159.5300       | 580.2686         | 1158.5460       | 579.7766         | <b>10</b> |
| 3  | 342.2023         | 171.6048        |                |                  | 324.1918       | 162.5995         | E    | <b>1077.4881</b> | <b>539.2477</b> | 1060.4616       | 530.7344         | 1059.4775       | 530.2424         | <b>9</b>  |
| 4  | <b>471.2449</b>  | 236.1261        |                |                  | 453.2344       | 227.1208         | E    | <b>948.4455</b>  | 474.7264        | 931.4190        | 466.2131         | 930.4349        | 465.7211         | <b>8</b>  |
| 5  | <b>542.2821</b>  | 271.6447        |                |                  | 524.2715       | 262.6394         | A    | <b>819.4029</b>  | 410.2051        | 802.3764        | 401.6918         | <b>801.3924</b> | 401.1998         | <b>7</b>  |
| 6  | 655.3661         | 328.1867        |                |                  | 637.3556       | 319.1814         | I    | <b>748.3658</b>  | 374.6865        | 731.3393        | 366.1733         | 730.3552        | 365.6813         | <b>6</b>  |
| 7  | <b>783.4247</b>  | 392.2160        | 766.3981       | 383.7027         | 765.4141       | 383.2107         | Q    | 635.2817         | 318.1445        | <b>618.2552</b> | 309.6312         | <b>617.2712</b> | 309.1392         | <b>5</b>  |
| 8  | <b>943.4554</b>  | 472.2313        | 926.4288       | 463.7180         | 925.4448       | 463.2260         | C    | <b>507.2232</b>  | 254.1152        | 490.1966        | 245.6019         | <b>489.2126</b> | 245.1099         | <b>4</b>  |
| 9  | <b>1014.4925</b> | 507.7499        | 997.4659       | 499.2366         | 996.4819       | 498.7446         | A    | <b>347.1925</b>  | 174.0999        | 330.1660        | 165.5866         | 329.1819        | 165.0946         | <b>3</b>  |
| 10 | <b>1143.5351</b> | 572.2712        | 1126.5085      | 563.7579         | 1125.5245      | 563.2659         | E    | <b>276.1554</b>  | 138.5813        | 259.1288        | 130.0681         | <b>258.1448</b> | 129.5761         | <b>2</b>  |
| 11 |                  |                 |                |                  |                |                  | K    | 147.1128         | 74.0600         | 130.0863        | 65.5468          |                 |                  | <b>1</b>  |

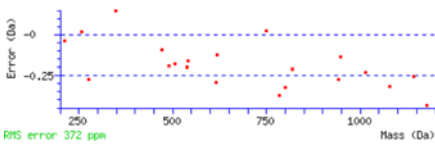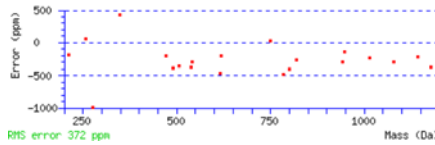

NCBI BLAST search of **LVEEAIQCAEK**

(Parameters: blastp, nr protein database, expect=20000, no filter, PAM30)

Other BLAST [web gateways](#)

All matches to this query

| Score | Mr(calc): | Delta   | Sequence                     |
|-------|-----------|---------|------------------------------|
| 55.4  | 1288.6333 | 0.0027  | <a href="#">LVEEAIQCAEK</a>  |
| 3.0   | 1288.6445 | -0.0086 | <a href="#">LVDQRELEK</a>    |
| 2.6   | 1288.6299 | 0.0061  | <a href="#">DDIYEHKEK</a>    |
| 2.2   | 1288.6299 | 0.0061  | <a href="#">LEIWDTAGQEK</a>  |
| 1.9   | 1287.6241 | 1.0119  | <a href="#">CGPRLSAEAAEK</a> |

Mascot: <http://www.matrixscience.com/>
