# Supplementary material
Source: PubMed Central journal article supplement (PMC3129996)
Supplement: NIHMS301784-supplement-Supplemental_Table_S4.pdf [file NIHMS301784-supplement-Supplemental_Table_S4.pdf]

**Supplementary Table S4 – MS/MS spectra of proteins identified by a single peptide match in ES(+) versus ES(-) analysis**

Proteins identified by single peptide matches required identity or extensive homology, and were considered matches when the MS/MS spectrum was of good quality with matching fragment ions above baseline noise, continuity in b- or y-ion series, and fragmentation at proline residues yielding intense y-ions.

**Mascot Search Results**

**Peptide View**

MS/MS Fragmentation of **GVVDSIEDIPLNLSR**

Found in **TRAP1\_MOUSE**, Heat shock protein 75 kDa, mitochondrial precursor (HSP 75) (Tumor necrosis factor type 1 receptor-associated protein) (TRAP-1) (TNFR-associated protein 1) - Mus musculus (Mouse) (Q9CQN1)

Match to Query 1371: 1512.779754 from(757.397153,2+)  
 Title: Arrell09040801 scan 1550 1550 (Arrell09040801.1550.1550.2.dta)  
 Data file Arrell09040801.mgf

Click mouse within plot area to zoom in by factor of two about that point  
 Or, Plot from  to  Da

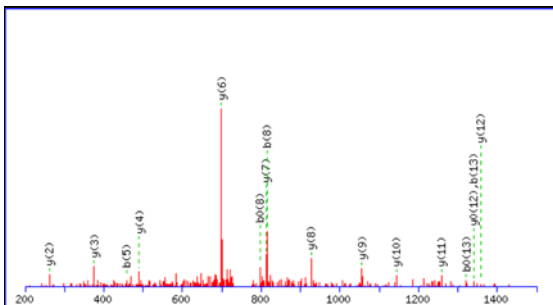

Monoisotopic mass of neutral peptide Mr(calc): 1512.7784  
 Ions Score: 61 Expect: 6.1e-06

Matches (Bold Red): 16/128 fragment ions using 33 most intense peaks

| #  | b                | b <sup>++</sup> | b*        | b <sup>*++</sup> | b <sup>0</sup>   | b <sup>0++</sup> | Seq. | y                | y <sup>++</sup> | y*        | y <sup>*++</sup> | y <sup>0</sup>   | y <sup>0++</sup> | #  |
|----|------------------|-----------------|-----------|------------------|------------------|------------------|------|------------------|-----------------|-----------|------------------|------------------|------------------|----|
| 1  | 58.0287          | 29.5180         |           |                  |                  |                  | G    |                  |                 |           |                  |                  |                  | 14 |
| 2  | 157.0972         | 79.0522         |           |                  |                  |                  | V    | 1456.7642        | 728.8857        | 1439.7376 | 720.3725         | 1438.7536        | 719.8805         | 13 |
| 3  | 256.1656         | 128.5864        |           |                  |                  |                  | V    | <b>1357.6958</b> | 679.3515        | 1340.6692 | 670.8383         | <b>1339.6852</b> | 670.3462         | 12 |
| 4  | 371.1925         | 186.0999        |           |                  | 353.1819         | 177.0946         | D    | <b>1258.6274</b> | 629.8173        | 1241.6008 | 621.3040         | 1240.6168        | 620.8120         | 11 |
| 5  | <b>458.2245</b>  | 229.6159        |           |                  | 440.2140         | 220.6106         | S    | <b>1143.6004</b> | 572.3039        | 1126.5739 | 563.7906         | 1125.5899        | 563.2986         | 10 |
| 6  | 587.2671         | 294.1372        |           |                  | 569.2566         | 285.1319         | E    | <b>1056.5684</b> | 528.7878        | 1039.5419 | 520.2746         | 1038.5578        | 519.7826         | 9  |
| 7  | 702.2941         | 351.6507        |           |                  | 684.2835         | 342.6454         | D    | <b>927.5258</b>  | 464.2665        | 910.4993  | 455.7533         | 909.5152         | 455.2613         | 8  |
| 8  | <b>815.3781</b>  | 408.1927        |           |                  | <b>797.3676</b>  | 399.1874         | I    | <b>812.4989</b>  | 406.7531        | 795.4723  | 398.2398         | 794.4883         | 397.7478         | 7  |
| 9  | 912.4309         | 456.7191        |           |                  | 894.4203         | 447.7138         | P    | <b>699.4148</b>  | 350.2110        | 682.3882  | 341.6978         | 681.4042         | 341.2058         | 6  |
| 10 | 1025.5150        | 513.2611        |           |                  | 1007.5044        | 504.2558         | L    | 602.3620         | 301.6847        | 585.3355  | 293.1714         | 584.3515         | 292.6794         | 5  |
| 11 | 1139.5579        | 570.2826        | 1122.5313 | 561.7693         | 1121.5473        | 561.2773         | N    | <b>489.2780</b>  | 245.1426        | 472.2514  | 236.6293         | 471.2674         | 236.1373         | 4  |
| 12 | 1252.6420        | 626.8246        | 1235.6154 | 618.3113         | 1234.6314        | 617.8193         | L    | <b>375.2350</b>  | 188.1212        | 358.2085  | 179.6079         | 357.2245         | 179.1159         | 3  |
| 13 | <b>1339.6740</b> | 670.3406        | 1322.6474 | 661.8274         | <b>1321.6634</b> | 661.3353         | S    | <b>262.1510</b>  | 131.5791        | 245.1244  | 123.0659         | 244.1404         | 122.5738         | 2  |
| 14 |                  |                 |           |                  |                  |                  | R    | 175.1190         | 88.0631         | 158.0924  | 79.5498          |                  |                  | 1  |

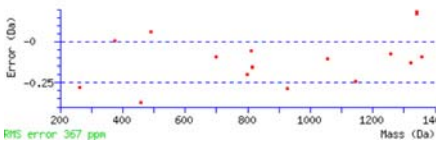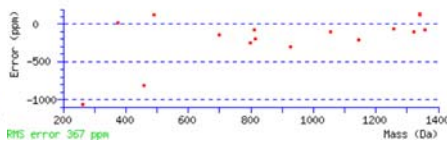

NCBI BLAST search of **GVVDSIEDIPLNLSR**  
 (Parameters: blastp, nr protein database, expect=20000, no filter, PAM30)  
 Other BLAST [web gateways](#)

All matches to this query

| Score | Mr(calc): | Delta  | Sequence                        |
|-------|-----------|--------|---------------------------------|
| 60.8  | 1512.7784 | 0.0014 | <a href="#">GVVDSIEDIPLNLSR</a> |
| 60.8  | 1512.7784 | 0.0014 | <a href="#">GVVDSIEDIPLNLSR</a> |

Mascot: <http://www.matrixscience.com/>

**MASCOT** (SCIENCE) **Mascot Search Results**

**Peptide View**

MS/MS Fragmentation of **IGIASQALGIAQASLDCAVK**

Found in **ACADS\_MOUSE**, Short-chain specific acyl-CoA dehydrogenase, mitochondrial precursor (EC 1.3.99.2) (SCAD) (Butyryl-CoA dehydrogenase) - Mus musculus (Mouse) (Q07417)

Match to Query 1669: 1985.059716 from(662.693848,3+)

Title: Arrell09040812 scan 2509 2509 (Arrell09040812.2509.2509.3.dta)

Data file Arrell09040812.mgf

Click mouse within plot area to zoom in by factor of two about that point

Or, Plot from 100 to 1800 Da **Full range**

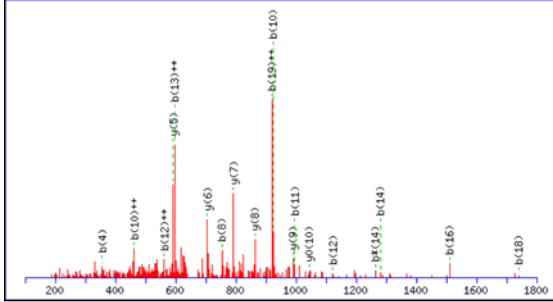

Monoisotopic mass of neutral peptide Mr(calc): 1985.0615

Variable modifications:

C17 : Carbamidomethyl (C)

Ions Score: 41 Expect: 0.00024

Matches (Bold Red): 19/202 fragment ions using 37 most intense peaks

| #  | b                | b <sup>++</sup> | b <sup>*</sup>   | b <sup>*++</sup> | b <sup>0</sup> | b <sup>0++</sup> | Seq.     | y               | y <sup>++</sup> | y <sup>*</sup> | y <sup>*++</sup> | y <sup>0</sup>   | y <sup>0++</sup> | #         |
|----|------------------|-----------------|------------------|------------------|----------------|------------------|----------|-----------------|-----------------|----------------|------------------|------------------|------------------|-----------|
| 1  | 114.0913         | 57.5493         |                  |                  |                |                  | <b>I</b> |                 |                 |                |                  |                  |                  | <b>20</b> |
| 2  | 171.1128         | 86.0600         |                  |                  |                |                  | <b>G</b> | 1872.9848       | 936.9960        | 1855.9582      | 928.4828         | 1854.9742        | 927.9907         | <b>19</b> |
| 3  | 284.1969         | 142.6021        |                  |                  |                |                  | <b>I</b> | 1815.9633       | 908.4853        | 1798.9368      | 899.9720         | 1797.9528        | 899.4800         | <b>18</b> |
| 4  | <b>355.2340</b>  | 178.1206        |                  |                  |                |                  | <b>A</b> | 1702.8793       | 851.9433        | 1685.8527      | 843.4300         | 1684.8687        | 842.9380         | <b>17</b> |
| 5  | 442.2660         | 221.6366        |                  |                  | 424.2554       | 212.6314         | <b>S</b> | 1631.8421       | 816.4247        | 1614.8156      | 807.9114         | 1613.8316        | 807.4194         | <b>16</b> |
| 6  | 570.3246         | 285.6659        | 553.2980         | 277.1527         | 552.3140       | 276.6606         | <b>Q</b> | 1544.8101       | 772.9087        | 1527.7836      | 764.3954         | 1526.7995        | 763.9034         | <b>15</b> |
| 7  | 641.3617         | 321.1845        | 624.3352         | 312.6712         | 623.3511       | 312.1792         | <b>A</b> | 1416.7515       | 708.8794        | 1399.7250      | 700.3661         | 1398.7410        | 699.8741         | <b>14</b> |
| 8  | <b>754.4458</b>  | 377.7265        | 737.4192         | 369.2132         | 736.4352       | 368.7212         | <b>L</b> | 1345.7144       | 673.3608        | 1328.6879      | 664.8476         | 1327.7039        | 664.3556         | <b>13</b> |
| 9  | 811.4672         | 406.2373        | 794.4407         | 397.7240         | 793.4567       | 397.2320         | <b>G</b> | 1232.6304       | 616.8188        | 1215.6038      | 608.3055         | 1214.6198        | 607.8135         | <b>12</b> |
| 10 | <b>924.5513</b>  | <b>462.7793</b> | 907.5247         | 454.2660         | 906.5407       | 453.7740         | <b>I</b> | 1175.6089       | 588.3081        | 1158.5823      | 579.7948         | 1157.5983        | 579.3028         | <b>11</b> |
| 11 | <b>995.5884</b>  | 498.2978        | 978.5619         | 489.7846         | 977.5778       | 489.2926         | <b>A</b> | 1062.5248       | 531.7661        | 1045.4983      | 523.2528         | <b>1044.5143</b> | 522.7608         | <b>10</b> |
| 12 | <b>1123.6470</b> | <b>562.3271</b> | 1106.6204        | 553.8139         | 1105.6364      | 553.3218         | <b>Q</b> | <b>991.4877</b> | 496.2475        | 974.4612       | 487.7342         | 973.4771         | 487.2422         | <b>9</b>  |
| 13 | 1194.6841        | <b>597.8457</b> | 1177.6576        | 589.3324         | 1176.6735      | 588.8404         | <b>A</b> | <b>863.4291</b> | 432.2182        | 846.4026       | 423.7049         | 845.4186         | 423.2129         | <b>8</b>  |
| 14 | <b>1281.7161</b> | 641.3617        | <b>1264.6896</b> | 632.8484         | 1263.7056      | 632.3564         | <b>S</b> | <b>792.3920</b> | 396.6996        | 775.3655       | 388.1864         | 774.3815         | 387.6944         | <b>7</b>  |
| 15 | 1394.8002        | 697.9037        | 1377.7736        | 689.3905         | 1376.7896      | 688.8985         | <b>L</b> | <b>705.3600</b> | 353.1836        | 688.3334       | 344.6704         | 687.3494         | 344.1784         | <b>6</b>  |
| 16 | <b>1509.8271</b> | 755.4172        | 1492.8006        | 746.9039         | 1491.8166      | 746.4119         | <b>D</b> | <b>592.2759</b> | 296.6416        | 575.2494       | 288.1283         | 574.2654         | 287.6363         | <b>5</b>  |
| 17 | 1669.8578        | 835.4325        | 1652.8312        | 826.9193         | 1651.8472      | 826.4273         | <b>C</b> | 477.2490        | 239.1281        | 460.2224       | 230.6149         |                  |                  | <b>4</b>  |
| 18 | <b>1740.8949</b> | 870.9511        | 1723.8684        | 862.4378         | 1722.8843      | 861.9458         | <b>A</b> | 317.2183        | 159.1128        | 300.1918       | 150.5995         |                  |                  | <b>3</b>  |
| 19 | 1839.9633        | <b>920.4853</b> | 1822.9368        | 911.9720         | 1821.9528      | 911.4800         | <b>V</b> | 246.1812        | 123.5942        | 229.1547       | 115.0810         |                  |                  | <b>2</b>  |
| 20 |                  |                 |                  |                  |                |                  | <b>K</b> | 147.1128        | 74.0600         | 130.0863       | 65.5468          |                  |                  | <b>1</b>  |

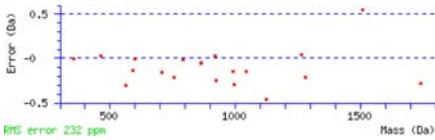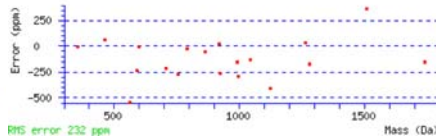

NCBI BLAST search of [IGIASQALGIAQASLDCAVK](#)

(Parameters: blastp, nr protein database, expect=20000, no filter, PAM30)

Other BLAST [web gateways](#)

All matches to this query

| Score | Mr(calc): | Delta   | Sequence                             |
|-------|-----------|---------|--------------------------------------|
| 41.0  | 1985.0615 | -0.0018 | <a href="#">IGIASQALGIAQASLDCAVK</a> |

Mascot: <http://www.matrixscience.com/>



**Mascot Search Results**

**Peptide View**

MS/MS Fragmentation of **LVLVNAIYFK**

Found in **ILEUA\_MOUSE**, Leukocyte elastase inhibitor A (Serpin B1a) (Serine protease inhibitor EIA) - Mus musculus (Mouse) (Q9D154)

Match to Query 948: 1178.705414 from(590.359983,2+)

Title: Arrell09040812 scan 2119 2119 (Arrell09040812.2119.2119.2.dta)

Data file Arrell09040812.mgf

Click mouse within plot area to zoom in by factor of two about that point

Or, Plot from 150 to 1100 Da **Full range**

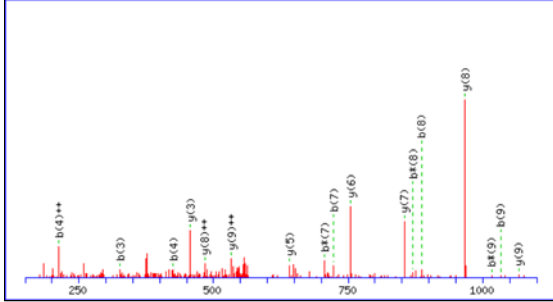

Monoisotopic mass of neutral peptide Mr(calc): 1178.7063

Ions Score: 47 Expect: 3.5e-05

Matches (Bold Red): 18/64 fragment ions using 29 most intense peaks

| #  | b                | b <sup>++</sup> | b*               | b <sup>++</sup> | Seq.     | y                | y <sup>++</sup> | y*        | y <sup>++</sup> | #         |
|----|------------------|-----------------|------------------|-----------------|----------|------------------|-----------------|-----------|-----------------|-----------|
| 1  | 114.0913         | 57.5493         |                  |                 | <b>L</b> |                  |                 |           |                 | <b>10</b> |
| 2  | <b>213.1598</b>  | 107.0835        |                  |                 | <b>V</b> | <b>1066.6295</b> | <b>533.8184</b> | 1049.6030 | 525.3051        | <b>9</b>  |
| 3  | <b>326.2438</b>  | 163.6255        |                  |                 | <b>L</b> | <b>967.5611</b>  | <b>484.2842</b> | 950.5346  | 475.7709        | <b>8</b>  |
| 4  | <b>425.3122</b>  | <b>213.1598</b> |                  |                 | <b>V</b> | <b>854.4771</b>  | 427.7422        | 837.4505  | 419.2289        | <b>7</b>  |
| 5  | 539.3552         | 270.1812        | 522.3286         | 261.6679        | <b>N</b> | <b>755.4087</b>  | 378.2080        | 738.3821  | 369.6947        | <b>6</b>  |
| 6  | 610.3923         | 305.6998        | 593.3657         | 297.1865        | <b>A</b> | <b>641.3657</b>  | 321.1865        | 624.3392  | 312.6732        | <b>5</b>  |
| 7  | <b>723.4763</b>  | 362.2418        | <b>706.4498</b>  | 353.7285        | <b>I</b> | 570.3286         | 285.6679        | 553.3021  | 277.1547        | <b>4</b>  |
| 8  | <b>886.5397</b>  | 443.7735        | <b>869.5131</b>  | 435.2602        | <b>Y</b> | <b>457.2445</b>  | 229.1259        | 440.2180  | 220.6126        | <b>3</b>  |
| 9  | <b>1033.6081</b> | 517.3077        | <b>1016.5815</b> | 508.7944        | <b>F</b> | 294.1812         | 147.5942        | 277.1547  | 139.0810        | <b>2</b>  |
| 10 |                  |                 |                  |                 | <b>K</b> | 147.1128         | 74.0600         | 130.0863  | 65.5468         | <b>1</b>  |

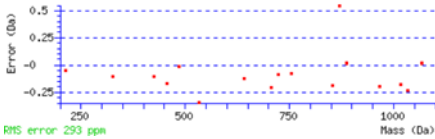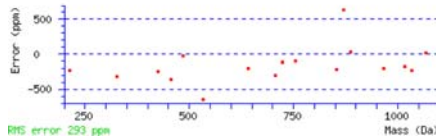

NCBI BLAST search of [LVLVNAIYFK](#)

(Parameters: blastp, nr protein database, expect=20000, no filter, PAM30)

Other BLAST [web gateways](#)

All matches to this query

| Score | Mr(calc): | Delta   | Sequence                   |
|-------|-----------|---------|----------------------------|
| 46.7  | 1178.7063 | -0.0009 | <a href="#">LVLVNAIYFK</a> |

Mascot: <http://www.matrixscience.com/>

**(MATRIX) (SCIENCE) Mascot Search Results**

**Peptide View**

MS/MS Fragmentation of **LISQVSSITASLR**

Found in **TBA1B\_MOUSE**, Tubulin alpha-1B chain (Tubulin alpha-2 chain) (Alpha-tubulin 2) (Alpha-tubulin isotype M-alpha-2) - Mus musculus (Mouse) (P05213)

Match to Query 1371: 1486.871864 from(744.443208,2+)

Title: Arrell09050802 scan 2929 2931 (Arrell09050802.2929.2931.2.dta)

Data file Arrell09050802.mgf

Click mouse within plot area to zoom in by factor of two about that point

Or, Plot from 200 to 1400 Da **Full range**

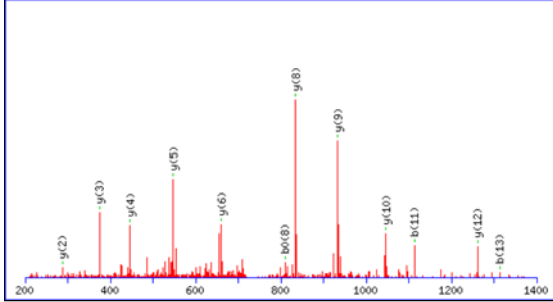

Monoisotopic mass of neutral peptide Mr(calc): 1486.8719

Ions Score: 97 Expect: 3.6e-10

Matches (Bold Red): 12/142 fragment ions using 17 most intense peaks

| #  | b                | b <sup>++</sup> | b*        | b <sup>++</sup> | b <sup>0</sup>  | b <sup>0++</sup> | Seq.     | y                | y <sup>++</sup> | y*        | y <sup>++</sup> | y <sup>0</sup> | y <sup>0++</sup> | #         |
|----|------------------|-----------------|-----------|-----------------|-----------------|------------------|----------|------------------|-----------------|-----------|-----------------|----------------|------------------|-----------|
| 1  | 114.0913         | 57.5493         |           |                 |                 |                  | <b>L</b> |                  |                 |           |                 |                |                  | <b>14</b> |
| 2  | 227.1754         | 114.0913        |           |                 |                 |                  | <b>I</b> | 1374.7951        | 687.9012        | 1357.7686 | 679.3879        | 1356.7845      | 678.8959         | <b>13</b> |
| 3  | 314.2074         | 157.6074        |           |                 | 296.1969        | 148.6021         | <b>S</b> | <b>1261.7110</b> | 631.3592        | 1244.6845 | 622.8459        | 1243.7005      | 622.3539         | <b>12</b> |
| 4  | 442.2660         | 221.6366        | 425.2395  | 213.1234        | 424.2554        | 212.6314         | <b>Q</b> | 1174.6790        | 587.8431        | 1157.6525 | 579.3299        | 1156.6684      | 578.8379         | <b>11</b> |
| 5  | 555.3501         | 278.1787        | 538.3235  | 269.6654        | 537.3395        | 269.1734         | <b>I</b> | <b>1046.6204</b> | 523.8139        | 1029.5939 | 515.3006        | 1028.6099      | 514.8086         | <b>10</b> |
| 6  | 654.4185         | 327.7129        | 637.3919  | 319.1996        | 636.4079        | 318.7076         | <b>V</b> | <b>933.5364</b>  | 467.2718        | 916.5098  | 458.7585        | 915.5258       | 458.2665         | <b>9</b>  |
| 7  | 741.4505         | 371.2289        | 724.4240  | 362.7156        | 723.4400        | 362.2236         | <b>S</b> | <b>834.4680</b>  | 417.7376        | 817.4414  | 409.2243        | 816.4574       | 408.7323         | <b>8</b>  |
| 8  | 828.4825         | 414.7449        | 811.4560  | 406.2316        | <b>810.4720</b> | 405.7396         | <b>S</b> | 747.4359         | 374.2216        | 730.4094  | 365.7083        | 729.4254       | 365.2163         | <b>7</b>  |
| 9  | 941.5666         | 471.2869        | 924.5401  | 462.7737        | 923.5560        | 462.2817         | <b>I</b> | <b>660.4039</b>  | 330.7056        | 643.3774  | 322.1923        | 642.3933       | 321.7003         | <b>6</b>  |
| 10 | 1042.6143        | 521.8108        | 1025.5877 | 513.2975        | 1024.6037       | 512.8055         | <b>T</b> | <b>547.3198</b>  | 274.1636        | 530.2933  | 265.6503        | 529.3093       | 265.1583         | <b>5</b>  |
| 11 | <b>1113.6514</b> | 557.3293        | 1096.6249 | 548.8161        | 1095.6408       | 548.3241         | <b>A</b> | <b>446.2722</b>  | 223.6397        | 429.2456  | 215.1264        | 428.2616       | 214.6344         | <b>4</b>  |
| 12 | 1200.6834        | 600.8454        | 1183.6569 | 592.3321        | 1182.6729       | 591.8401         | <b>S</b> | <b>375.2350</b>  | 188.1212        | 358.2085  | 179.6079        | 357.2245       | 179.1159         | <b>3</b>  |
| 13 | <b>1313.7675</b> | 657.3874        | 1296.7409 | 648.8741        | 1295.7569       | 648.3821         | <b>L</b> | <b>288.2030</b>  | 144.6051        | 271.1765  | 136.0919        |                |                  | <b>2</b>  |
| 14 |                  |                 |           |                 |                 |                  | <b>R</b> | 175.1190         | 88.0631         | 158.0924  | 79.5498         |                |                  | <b>1</b>  |

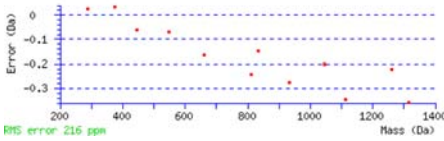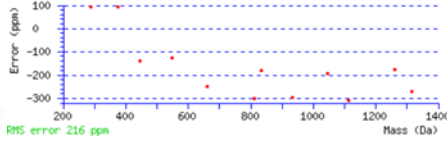

NCBI BLAST search of **LISQVSSITASLR**

(Parameters: blastp, nr protein database, expect=20000, no filter, PAM30)

Other BLAST [web gateways](#)

All matches to this query

| Score | Mr(calc): | Delta   | Sequence             |
|-------|-----------|---------|----------------------|
| 96.8  | 1486.8719 | -0.0000 | <b>LISQVSSITASLR</b> |

Mascot: <http://www.matrixscience.com/>

**MASCOT** (SCIENCE) **Mascot Search Results**

**Peptide View**

MS/MS Fragmentation of **SQLLIMDR**

Found in **STXB2\_MOUSE**, Syntaxis-binding protein 2 (Unc-18 homolog 2) (Unc-18B) (MUSEC1) - Mus musculus (Mouse) (Q64324)

Match to Query 506: 991.514684 from(496.764618,2+)

Title: Arrell09050824 scan 2603 2603 (Arrell09050824.2603.2603.2.dta)

Data file Arrell09050824.mgf

Click mouse within plot area to zoom in by factor of two about that point

Or, Plot from 100 to 950 Da Full range

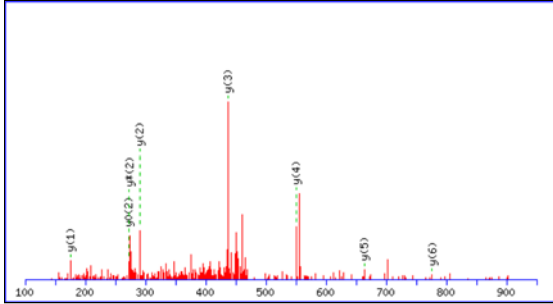

Monoisotopic mass of neutral peptide Mr(calc): 990.5168

Variable modifications:

M6 : Oxidation (M), with neutral losses 0.0000(shown in table), 63.9983

Ions Score: 32 Expect: 0.01

Matches (Bold Red): 8/122 fragment ions using 20 most intense peaks

| # | b        | b <sup>++</sup> | b*       | b <sup>***</sup> | b <sup>0</sup> | b <sup>0++</sup> | Seq.     | y               | y <sup>++</sup> | y*              | y <sup>***</sup> | y <sup>0</sup>  | y <sup>0++</sup> | #        |
|---|----------|-----------------|----------|------------------|----------------|------------------|----------|-----------------|-----------------|-----------------|------------------|-----------------|------------------|----------|
| 1 | 88.0393  | 44.5233         |          |                  | 70.0287        | 35.5180          | <b>S</b> |                 |                 |                 |                  |                 |                  | <b>8</b> |
| 2 | 216.0979 | 108.5526        | 199.0713 | 100.0393         | 198.0873       | 99.5473          | <b>Q</b> | 904.4921        | 452.7497        | 887.4655        | 444.2364         | 886.4815        | 443.7444         | <b>7</b> |
| 3 | 329.1819 | 165.0946        | 312.1554 | 156.5813         | 311.1714       | 156.0893         | <b>L</b> | <b>776.4335</b> | 388.7204        | 759.4069        | 380.2071         | 758.4229        | 379.7151         | <b>6</b> |
| 4 | 442.2660 | 221.6366        | 425.2395 | 213.1234         | 424.2554       | 212.6314         | <b>L</b> | <b>663.3494</b> | 332.1784        | 646.3229        | 323.6651         | 645.3389        | 323.1731         | <b>5</b> |
| 5 | 555.3501 | 278.1787        | 538.3235 | 269.6654         | 537.3395       | 269.1734         | <b>I</b> | <b>550.2654</b> | 275.6363        | 533.2388        | 267.1230         | 532.2548        | 266.6310         | <b>4</b> |
| 6 | 702.3855 | 351.6964        | 685.3589 | 343.1831         | 684.3749       | 342.6911         | <b>M</b> | <b>437.1813</b> | 219.0943        | 420.1547        | 210.5810         | 419.1707        | 210.0890         | <b>3</b> |
| 7 | 817.4124 | 409.2098        | 800.3859 | 400.6966         | 799.4019       | 400.2046         | <b>D</b> | <b>290.1459</b> | 145.5766        | <b>273.1193</b> | 137.0633         | <b>272.1353</b> | 136.5713         | <b>2</b> |
| 8 |          |                 |          |                  |                |                  | <b>R</b> | <b>175.1190</b> | 88.0631         | 158.0924        | 79.5498          |                 |                  | <b>1</b> |

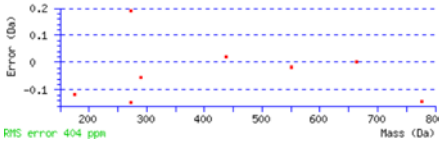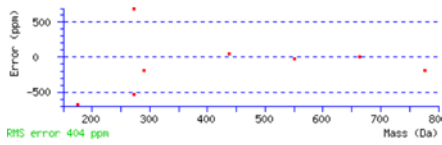

NCBI BLAST search of **SQLLIMDR**

(Parameters: blastp, nr protein database, expect=20000, no filter, PAM30)

Other BLAST [web gateways](#)

All matches to this query

| Score | Mr(calc): | Delta   | Sequence                  |
|-------|-----------|---------|---------------------------|
| 31.6  | 990.5168  | 0.9979  | <a href="#">SQLLIMDR</a>  |
| 19.9  | 990.5168  | 0.9979  | <a href="#">SLQLIMDR</a>  |
| 7.0   | 991.5199  | -0.0052 | <a href="#">SELITHHR</a>  |
| 2.1   | 991.5087  | 0.0060  | <a href="#">QAKDDFLR</a>  |
| 0.8   | 990.5134  | 1.0013  | <a href="#">QLAEDFLR</a>  |
| 0.8   | 991.5087  | 0.0060  | <a href="#">QVSAGDLFR</a> |
| 0.5   | 990.5168  | 0.9979  | <a href="#">QSILAMGQK</a> |

Mascot: <http://www.matrixscience.com/>

**(MATRIX) (SCIENCE) Mascot Search Results**

**Peptide View**

MS/MS Fragmentation of **VAVSADPNVPNVIVTR**

Found in **GDIR\_MOUSE**, Rho GDP-dissociation inhibitor 1 (Rho GDI 1) (Rho-GDI alpha) (GDI-1) - Mus musculus (Mouse) (Q99PT1)

Match to Query 1694: 1649.910254 from(825.962403,2+)

Title: Arrell09050825 scan 1265 1265 (Arrell09050825.1265.1265.2.dta)

Data file Arrell09050825.mgf

Click mouse within plot area to zoom in by factor of two about that point

Or, Plot from 200 to 1600 Da Full range

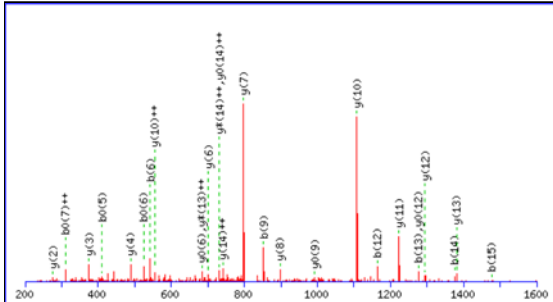

Monoisotopic mass of neutral peptide Mr(calc): 1649.9101

Ions Score: 62 Expect: 1.8e-06

Matches (Bold Red): 27/158 fragment ions using 43 most intense peaks

| #  | b                | b <sup>++</sup> | b <sup>*</sup> | b <sup>*++</sup> | b <sup>0</sup>  | b <sup>0++</sup> | Seq. | y                | y <sup>++</sup> | y <sup>*</sup> | y <sup>*++</sup> | y <sup>0</sup>   | y <sup>0++</sup> | #  |
|----|------------------|-----------------|----------------|------------------|-----------------|------------------|------|------------------|-----------------|----------------|------------------|------------------|------------------|----|
| 1  | 100.0757         | 50.5415         |                |                  |                 |                  | V    |                  |                 |                |                  |                  |                  | 16 |
| 2  | 171.1128         | 86.0600         |                |                  |                 |                  | A    | 1551.8489        | 776.4281        | 1534.8224      | 767.9148         | 1533.8384        | 767.4228         | 15 |
| 3  | 270.1812         | 135.5942        |                |                  |                 |                  | V    | 1480.8118        | <b>740.9095</b> | 1463.7853      | <b>732.3963</b>  | 1462.8013        | <b>731.9043</b>  | 14 |
| 4  | 357.2132         | 179.1103        |                |                  | 339.2027        | 170.1050         | S    | <b>1381.7434</b> | 691.3753        | 1364.7169      | <b>682.8621</b>  | 1363.7328        | 682.3701         | 13 |
| 5  | 428.2504         | 214.6288        |                |                  | <b>410.2398</b> | 205.6235         | A    | <b>1294.7114</b> | 647.8593        | 1277.6848      | 639.3461         | <b>1276.7008</b> | 638.8540         | 12 |
| 6  | <b>543.2773</b>  | 272.1423        |                |                  | <b>525.2667</b> | 263.1370         | D    | <b>1223.6743</b> | 612.3408        | 1206.6477      | 603.8275         | 1205.6637        | 603.3355         | 11 |
| 7  | 640.3301         | 320.6687        |                |                  | 622.3195        | <b>311.6634</b>  | P    | <b>1108.6473</b> | <b>554.8273</b> | 1091.6208      | 546.3140         | 1090.6368        | 545.8220         | 10 |
| 8  | 754.3730         | 377.6901        | 737.3464       | 369.1769         | 736.3624        | 368.6849         | N    | 1011.5946        | 506.3009        | 994.5680       | 497.7876         | <b>993.5840</b>  | 497.2956         | 9  |
| 9  | <b>853.4414</b>  | 427.2243        | 836.4149       | 418.7111         | 835.4308        | 418.2191         | V    | <b>897.5516</b>  | 449.2795        | 880.5251       | 440.7662         | 879.5411         | 440.2742         | 8  |
| 10 | 950.4942         | 475.7507        | 933.4676       | 467.2374         | 932.4836        | 466.7454         | P    | <b>798.4832</b>  | 399.7452        | 781.4567       | 391.2320         | 780.4726         | 390.7400         | 7  |
| 11 | 1064.5371        | 532.7722        | 1047.5105      | 524.2589         | 1046.5265       | 523.7669         | N    | <b>701.4305</b>  | 351.2189        | 684.4039       | 342.7056         | <b>683.4199</b>  | 342.2136         | 6  |
| 12 | <b>1163.6055</b> | 582.3064        | 1146.5790      | 573.7931         | 1145.5949       | 573.3011         | V    | 587.3875         | 294.1974        | 570.3610       | 285.6841         | 569.3770         | 285.1921         | 5  |
| 13 | <b>1276.6896</b> | 638.8484        | 1259.6630      | 630.3352         | 1258.6790       | 629.8431         | I    | <b>488.3191</b>  | 244.6632        | 471.2926       | 236.1499         | 470.3085         | 235.6579         | 4  |
| 14 | <b>1375.7580</b> | 688.3826        | 1358.7314      | 679.8694         | 1357.7474       | 679.3774         | V    | <b>375.2350</b>  | 188.1212        | 358.2085       | 179.6079         | 357.2245         | 179.1159         | 3  |
| 15 | <b>1476.8057</b> | 738.9065        | 1459.7791      | 730.3932         | 1458.7951       | 729.9012         | T    | <b>276.1666</b>  | 138.5870        | 259.1401       | 130.0737         | 258.1561         | 129.5817         | 2  |
| 16 |                  |                 |                |                  |                 |                  | R    | 175.1190         | 88.0631         | 158.0924       | 79.5498          |                  |                  | 1  |

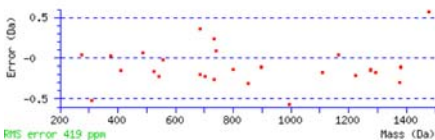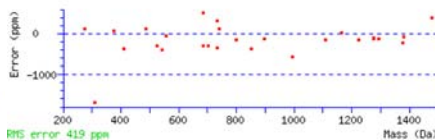

NCBI BLAST search of **VAVSADPNVPNVIVTR**

(Parameters: blastp, nr protein database, expect=20000, no filter, PAM30)

Other BLAST [web gateways](#)

All matches to this query

| Score | Mr(calc): | Delta  | Sequence                         |
|-------|-----------|--------|----------------------------------|
| 62.1  | 1649.9101 | 0.0002 | <a href="#">VAVSADPNVPNVIVTR</a> |

Mascot: <http://www.matrixscience.com/>



**(MATRIX) (SCIENCE) Mascot Search Results**

**Peptide View**

MS/MS Fragmentation of **SCAEFVSGSQLR**  
 Found in **ATPSH\_MOUSE**, ATP synthase D chain, mitochondrial (EC 3.6.3.14) - Mus musculus (Mouse) (Q9DCX2)

Match to Query 1191: 1339.619844 from(670.817198,2+)  
 Title: Arrell09050827 scan 829 829 (Arrell09050827.829.829.2.dta)  
 Data file Arrell09050827.mgf

Click mouse within plot area to zoom in by factor of two about that point  
 Or, Plot from 100 to 1200 Da Full range

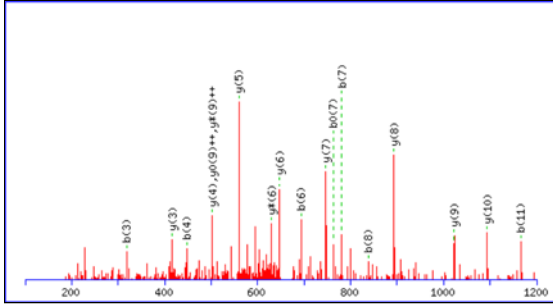

Monoisotopic mass of neutral peptide Mr(calc): 1339.6190  
 Variable modifications:  
 C2 : Carbamidomethyl (C)  
 Ions Score: 60 Expect: 6.9e-06  
 Matches (Bold Red): 18/108 fragment ions using 27 most intense peaks

| #  | b                | b <sup>++</sup> | b*        | b* <sup>++</sup> | b <sup>0</sup>  | b <sup>0</sup> <sup>++</sup> | Seq. | y                | y <sup>++</sup> | y*              | y* <sup>++</sup> | y <sup>0</sup> | y <sup>0</sup> <sup>++</sup> | #  |
|----|------------------|-----------------|-----------|------------------|-----------------|------------------------------|------|------------------|-----------------|-----------------|------------------|----------------|------------------------------|----|
| 1  | 88.0393          | 44.5233         |           |                  | 70.0287         | 35.5180                      | S    |                  |                 |                 |                  |                |                              | 12 |
| 2  | 248.0700         | 124.5386        |           |                  | 230.0594        | 115.5333                     | C    | 1253.5943        | 627.3008        | 1236.5678       | 618.7875         | 1235.5837      | 618.2955                     | 11 |
| 3  | <b>319.1071</b>  | 160.0572        |           |                  | 301.0965        | 151.0519                     | A    | <b>1093.5636</b> | 547.2855        | 1076.5371       | 538.7722         | 1075.5531      | 538.2802                     | 10 |
| 4  | <b>448.1497</b>  | 224.5785        |           |                  | 430.1391        | 215.5732                     | E    | <b>1022.5265</b> | 511.7669        | 1005.5000       | <b>503.2536</b>  | 1004.5160      | <b>502.7616</b>              | 9  |
| 5  | 595.2181         | 298.1127        |           |                  | 577.2075        | 289.1074                     | F    | <b>893.4839</b>  | 447.2456        | 876.4574        | 438.7323         | 875.4734       | 438.2403                     | 8  |
| 6  | <b>694.2865</b>  | 347.6469        |           |                  | 676.2759        | 338.6416                     | V    | <b>746.4155</b>  | 373.7114        | 729.3890        | 365.1981         | 728.4050       | 364.7061                     | 7  |
| 7  | <b>781.3185</b>  | 391.1629        |           |                  | <b>763.3080</b> | 382.1576                     | S    | <b>647.3471</b>  | 324.1772        | <b>630.3206</b> | 315.6639         | 629.3365       | 315.1719                     | 6  |
| 8  | <b>838.3400</b>  | 419.6736        |           |                  | 820.3294        | 410.6683                     | G    | <b>560.3151</b>  | 280.6612        | 543.2885        | 272.1479         | 542.3045       | 271.6559                     | 5  |
| 9  | 925.3720         | 463.1896        |           |                  | 907.3614        | 454.1844                     | S    | <b>503.2936</b>  | 252.1504        | 486.2671        | 243.6372         | 485.2831       | 243.1452                     | 4  |
| 10 | 1053.4306        | 527.2189        | 1036.4040 | 518.7057         | 1035.4200       | 518.2137                     | Q    | <b>416.2616</b>  | 208.6344        | 399.2350        | 200.1212         |                |                              | 3  |
| 11 | <b>1166.5147</b> | 583.7610        | 1149.4881 | 575.2477         | 1148.5041       | 574.7557                     | L    | 288.2030         | 144.6051        | 271.1765        | 136.0919         |                |                              | 2  |
| 12 |                  |                 |           |                  |                 |                              | R    | 175.1190         | 88.0631         | 158.0924        | 79.5498          |                |                              | 1  |

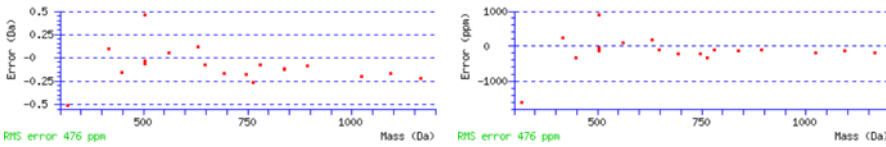

NCBI BLAST search of **SCAEFVSGSQLR**  
 (Parameters: blastp, nr protein database, expect=20000, no filter, PAM30)  
 Other BLAST [web gateways](#)

**All matches to this query**

| Score | Mr(calc): | Delta  | Sequence                     |
|-------|-----------|--------|------------------------------|
| 59.5  | 1339.6190 | 0.0008 | <a href="#">SCAEFVSGSQLR</a> |
| 8.9   | 1339.6125 | 0.0073 | <a href="#">VLPSCHAPCGSR</a> |
| 0.3   | 1338.6233 | 0.9965 | <a href="#">MVTVMPLMEK</a>   |

Mascot: <http://www.matrixscience.com/>

**Mascot Search Results**

**Peptide View**

MS/MS Fragmentation of **QITVNDLPVGR**

Found in **PRDX2\_MOUSE**, Peroxiredoxin-2 (EC 1.11.1.15) (Thioredoxin peroxidase 1) (Thioredoxin-dependent peroxide reductase 1) (Thiol-specific antioxidant protein) (TSA) - Mus musculus (Mouse) (Q61171)

Match to Query 992: 1211.669534 from(606.842043,2+)  
 Title: Arrell09050827 scan 1180 1180 (Arrell09050827.1180.1180.2.dta)  
 Data file Arrell09050827.mgf

Click mouse within plot area to zoom in by factor of two about that point  
 Or, Plot from 150 to 1200 Da Full range

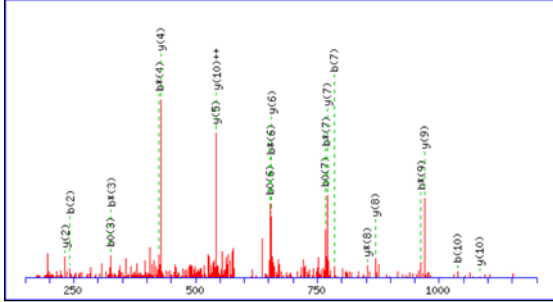

Monoisotopic mass of neutral peptide Mr(calc): 1210.6670  
 Ions Score: 48 Expect: 0.00011  
 Matches (Bold Red): 21/106 fragment ions using 44 most intense peaks

| #  | b                | b <sup>++</sup> | b*              | b <sup>*++</sup> | b <sup>0</sup>  | b <sup>0++</sup> | Seq. | y                | y <sup>++</sup> | y*              | y <sup>*++</sup> | y <sup>0</sup> | y <sup>0++</sup> | #  |
|----|------------------|-----------------|-----------------|------------------|-----------------|------------------|------|------------------|-----------------|-----------------|------------------|----------------|------------------|----|
| 1  | 129.0659         | 65.0366         | 112.0393        | 56.5233          |                 |                  | Q    |                  |                 |                 |                  |                |                  | 11 |
| 2  | <b>242.1499</b>  | 121.5786        | 225.1234        | 113.0653         |                 |                  | I    | <b>1083.6157</b> | <b>542.3115</b> | 1066.5891       | 533.7982         | 1065.6051      | 533.3062         | 10 |
| 3  | 343.1976         | 172.1024        | <b>326.1710</b> | 163.5892         | <b>325.1870</b> | 163.0972         | T    | <b>970.5316</b>  | 485.7694        | 953.5051        | 477.2562         | 952.5211       | 476.7642         | 9  |
| 4  | 442.2660         | 221.6366        | <b>425.2395</b> | 213.1234         | 424.2554        | 212.6314         | V    | <b>869.4839</b>  | 435.2456        | <b>852.4574</b> | 426.7323         | 851.4734       | 426.2403         | 8  |
| 5  | 556.3089         | 278.6581        | 539.2824        | 270.1448         | 538.2984        | 269.6528         | N    | <b>770.4155</b>  | 385.7114        | 753.3890        | 377.1981         | 752.4050       | 376.7061         | 7  |
| 6  | 671.3359         | 336.1716        | <b>654.3093</b> | 327.6583         | <b>653.3253</b> | 327.1663         | D    | <b>656.3726</b>  | 328.6899        | 639.3461        | 320.1767         | 638.3620       | 319.6847         | 6  |
| 7  | <b>784.4199</b>  | 392.7136        | <b>767.3934</b> | 384.2003         | <b>766.4094</b> | 383.7083         | L    | <b>541.3457</b>  | 271.1765        | 524.3191        | 262.6632         |                |                  | 5  |
| 8  | 881.4727         | 441.2400        | 864.4462        | 432.7267         | 863.4621        | 432.2347         | P    | <b>428.2616</b>  | 214.6344        | 411.2350        | 206.1212         |                |                  | 4  |
| 9  | 980.5411         | 490.7742        | <b>963.5146</b> | 482.2609         | 962.5306        | 481.7689         | V    | 331.2088         | 166.1081        | 314.1823        | 157.5948         |                |                  | 3  |
| 10 | <b>1037.5626</b> | 519.2849        | 1020.5360       | 510.7717         | 1019.5520       | 510.2796         | G    | <b>232.1404</b>  | 116.5738        | 215.1139        | 108.0606         |                |                  | 2  |
| 11 |                  |                 |                 |                  |                 |                  | R    | 175.1190         | 88.0631         | 158.0924        | 79.5498          |                |                  | 1  |

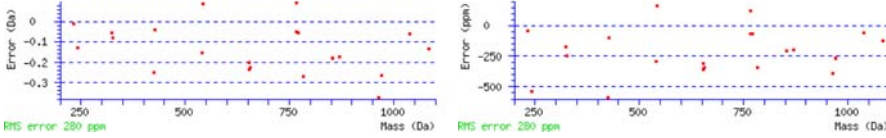

NCBI BLAST search of **QITVNDLPVGR**  
 (Parameters: blastp, nr protein database, expect=20000, no filter, PAM30)  
 Other BLAST [web gateways](#)

**All matches to this query**

| Score | Mr(calc): | Delta  | Sequence                    |
|-------|-----------|--------|-----------------------------|
| 47.6  | 1210.6670 | 1.0025 | <a href="#">QITVNDLPVGR</a> |
| 6.8   | 1210.6670 | 1.0026 | <a href="#">GANSEPAIQAR</a> |

Mascot: <http://www.matrixscience.com/>

**MASCOT** **SCIENCE** Mascot Search Results

**Peptide View**

MS/MS Fragmentation of **LGGDLGTYVINK**

Found in **FRDA\_MOUSE**, Frataxin, mitochondrial precursor (Fxn) - Mus musculus (Mouse) (O35943)

Match to Query 1009: 1248.670144 from(625.342348,2+)

Title: Arrell09050830 scan 1344 1344 (Arrell09050830.1344.1344.2.dta)

Data file Arrell09050830.mgf

Click mouse within plot area to zoom in by factor of two about that point

Or, Plot from 150 to 1150 Da Full range

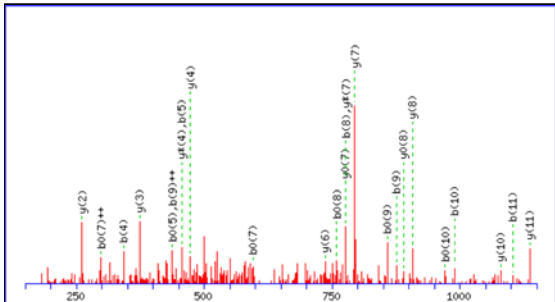

Monoisotopic mass of neutral peptide Mr(calc): 1248.6714

Ions Score: 46 Expect: 0.00016

Matches (Bold Red): 25/96 fragment ions using 48 most intense peaks

| #  | b                | b <sup>++</sup> | b*        | b <sup>*++</sup> | b <sup>0</sup>  | b <sup>0++</sup> | Seq. | y                | y <sup>++</sup> | y*              | y <sup>*++</sup> | y <sup>0</sup>  | y <sup>0++</sup> | #  |
|----|------------------|-----------------|-----------|------------------|-----------------|------------------|------|------------------|-----------------|-----------------|------------------|-----------------|------------------|----|
| 1  | 114.0913         | 57.5493         |           |                  |                 |                  | L    |                  |                 |                 |                  |                 |                  | 12 |
| 2  | 171.1128         | 86.0600         |           |                  |                 |                  | G    | <b>1136.5946</b> | 568.8009        | 1119.5681       | 560.2877         | 1118.5841       | 559.7957         | 11 |
| 3  | 228.1343         | 114.5708        |           |                  |                 |                  | G    | <b>1079.5732</b> | 540.2902        | 1062.5466       | 531.7769         | 1061.5626       | 531.2849         | 10 |
| 4  | <b>343.1612</b>  | 172.0842        |           |                  | 325.1506        | 163.0790         | D    | 1022.5517        | 511.7795        | 1005.5251       | 503.2662         | 1004.5411       | 502.7742         | 9  |
| 5  | <b>456.2453</b>  | 228.6263        |           |                  | <b>438.2347</b> | 219.6210         | L    | <b>907.5247</b>  | 454.2660        | 890.4982        | 445.7527         | <b>889.5142</b> | 445.2607         | 8  |
| 6  | 513.2667         | 257.1370        |           |                  | 495.2562        | 248.1317         | G    | <b>794.4407</b>  | 397.7240        | <b>777.4141</b> | 389.2107         | <b>776.4301</b> | 388.7187         | 7  |
| 7  | 614.3144         | 307.6608        |           |                  | <b>596.3039</b> | <b>298.6556</b>  | T    | <b>737.4192</b>  | 369.2132        | 720.3927        | 360.7000         | 719.4087        | 360.2080         | 6  |
| 8  | <b>777.3777</b>  | 389.1925        |           |                  | <b>759.3672</b> | 380.1872         | Y    | 636.3715         | 318.6894        | 619.3450        | 310.1761         |                 |                  | 5  |
| 9  | <b>876.4462</b>  | <b>438.7267</b> |           |                  | <b>858.4356</b> | 429.7214         | V    | <b>473.3082</b>  | 237.1577        | <b>456.2817</b> | 228.6445         |                 |                  | 4  |
| 10 | <b>989.5302</b>  | 495.2688        |           |                  | <b>971.5197</b> | 486.2635         | I    | <b>374.2398</b>  | 187.6235        | 357.2132        | 179.1103         |                 |                  | 3  |
| 11 | <b>1103.5732</b> | 552.2902        | 1086.5466 | 543.7769         | 1085.5626       | 543.2849         | N    | <b>261.1557</b>  | 131.0815        | 244.1292        | 122.5682         |                 |                  | 2  |
| 12 |                  |                 |           |                  |                 |                  | K    | 147.1128         | 74.0600         | 130.0863        | 65.5468          |                 |                  | 1  |

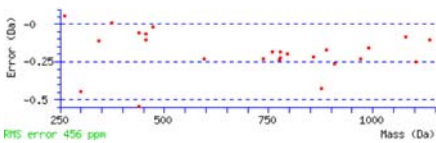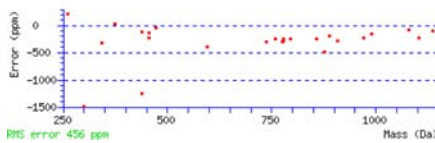

NCBI BLAST search of **LGGDLGTYVINK**

(Parameters: blastp, nr protein database, expect=20000, no filter, PAM30)

Other BLAST [web gateways](#)

All matches to this query

| Score | Mr(calc): | Delta   | Sequence                     |
|-------|-----------|---------|------------------------------|
| 46.2  | 1248.6714 | -0.0013 | <a href="#">LGGDLGTYVINK</a> |
| 7.4   | 1248.6747 | -0.0046 | <a href="#">TKLLLCNSALSS</a> |
| 1.7   | 1248.6722 | -0.0021 | <a href="#">MKNICWLTLLK</a>  |

Mascot: <http://www.matrixscience.com/>

**MASCOT** (SCIENCE) **Mascot Search Results**

**Peptide View**

MS/MS Fragmentation of **LILTLTHGSVVSTR**

Found in **FABPH\_MOUSE**, Fatty acid-binding protein, heart (H-FABP) (Heart-type fatty acid-binding protein) (Mammary-derived growth inhibitor) (MDGI) - Mus musculus (Mouse) (P11404)

Match to Query 1375: 1495.872284 from(748.943418,2+)

Title: Arrell09050831 scan 1401 1401 (Arrell09050831.1401.1401.2.dta)

Data file Arrell09050831.mgf

Click mouse within plot area to zoom in by factor of two about that point

Or, Plot from 200 to 1400 Da **Full range**

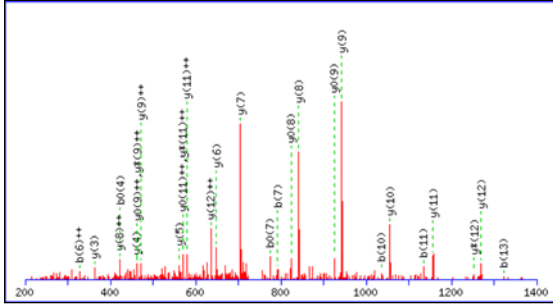

Monoisotopic mass of neutral peptide Mr(calc): 1495.8722

Ions Score: 63 Expect: 1e-06

Matches (Bold Red): 28/122 fragment ions using 52 most intense peaks

| #  | b                | b <sup>++</sup> | b <sup>0</sup>  | b <sup>0++</sup> | Seq. | y                | y <sup>++</sup> | y*               | y <sup>*++</sup> | y <sup>0</sup>  | y <sup>0++</sup> | #  |
|----|------------------|-----------------|-----------------|------------------|------|------------------|-----------------|------------------|------------------|-----------------|------------------|----|
| 1  | 114.0913         | 57.5493         |                 |                  | L    |                  |                 |                  |                  |                 |                  | 14 |
| 2  | 227.1754         | 114.0913        |                 |                  | I    | 1383.7954        | 692.4014        | 1366.7689        | 683.8881         | 1365.7849       | 683.3961         | 13 |
| 3  | 340.2595         | 170.6334        |                 |                  | L    | <b>1270.7114</b> | <b>635.8593</b> | <b>1253.6848</b> | 627.3461         | 1252.7008       | 626.8540         | 12 |
| 4  | 441.3071         | 221.1572        | <b>423.2966</b> | 212.1519         | T    | <b>1157.6273</b> | <b>579.3173</b> | 1140.6008        | <b>570.8040</b>  | 1139.6167       | <b>570.3120</b>  | 11 |
| 5  | 554.3912         | 277.6992        | 536.3806        | 268.6940         | L    | <b>1056.5796</b> | 528.7935        | 1039.5531        | 520.2802         | 1038.5691       | 519.7882         | 10 |
| 6  | 655.4389         | <b>328.2231</b> | 637.4283        | 319.2178         | T    | <b>943.4956</b>  | <b>472.2514</b> | 926.4690         | <b>463.7381</b>  | <b>925.4850</b> | <b>463.2461</b>  | 9  |
| 7  | <b>792.4978</b>  | 396.7525        | <b>774.4872</b> | 387.7473         | H    | <b>842.4479</b>  | <b>421.7276</b> | 825.4213         | 413.2143         | <b>824.4373</b> | 412.7223         | 8  |
| 8  | 849.5193         | 425.2633        | 831.5087        | 416.2580         | G    | <b>705.3890</b>  | 353.1981        | 688.3624         | 344.6849         | 687.3784        | 344.1928         | 7  |
| 9  | 936.5513         | 468.7793        | 918.5407        | 459.7740         | S    | <b>648.3675</b>  | 324.6874        | 631.3410         | 316.1741         | 630.3570        | 315.6821         | 6  |
| 10 | <b>1035.6197</b> | 518.3135        | 1017.6091       | 509.3082         | V    | <b>561.3355</b>  | 281.1714        | 544.3089         | 272.6581         | 543.3249        | 272.1661         | 5  |
| 11 | <b>1134.6881</b> | 567.8477        | 1116.6776       | 558.8424         | V    | <b>462.2671</b>  | 231.6372        | 445.2405         | 223.1239         | 444.2565        | 222.6319         | 4  |
| 12 | 1221.7202        | 611.3637        | 1203.7096       | 602.3584         | S    | <b>363.1987</b>  | 182.1030        | 346.1721         | 173.5897         | 345.1881        | 173.0977         | 3  |
| 13 | <b>1322.7678</b> | 661.8876        | 1304.7573       | 652.8823         | T    | 276.1666         | 138.5870        | 259.1401         | 130.0737         | 258.1561        | 129.5817         | 2  |
| 14 |                  |                 |                 |                  | R    | 175.1190         | 88.0631         | 158.0924         | 79.5498          |                 |                  | 1  |

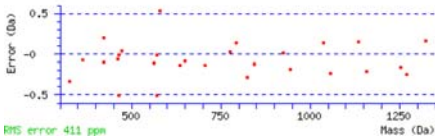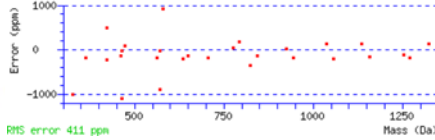

NCBI BLAST search of **LILTLTHGSVVSTR**

(Parameters: blast, nr protein database, expect=20000, no filter, PAM30)

Other BLAST [web gateways](#)

All matches to this query

| Score | Mr(calc): | Delta  | Sequence                       |
|-------|-----------|--------|--------------------------------|
| 62.7  | 1495.8722 | 0.0000 | <a href="#">LILTLTHGSVVSTR</a> |

Mascot: <http://www.matrixscience.com/>

**(MATRIX) (SCIENCE) Mascot Search Results**

**Peptide View**

MS/MS Fragmentation of **RTMLAENNLETLK**

Found in **CASPS\_MOUSE**, Caspase-8 precursor (EC 3.4.22.61) (CASP-8) [Contains: Caspase-8 subunit p18; Caspase-8 subunit p10] - Mus musculus (Mouse) (O89110)

Match to Query 1246: 1547.788794 from(774.901673,2+)

Title: Arrell09050804 scan 1381 1381 (Arrell09050804.1381.1381.2.dta)

Data file Arrell09050804.mgf

Click mouse within plot area to zoom in by factor of two about that point

Or, Plot from 200 to 1600 Da Full range

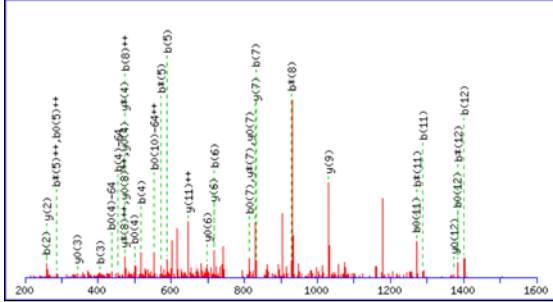

Monoisotopic mass of neutral peptide Mr(calc): 1547.7977

Variable modifications:

M3 : Oxidation (M), with neutral losses 0.0000(shown in table), 63.9983

Ions Score: 31 Expect: 0.0054

Matches (Bold Red): 36/210 fragment ions using 66 most intense peaks

| #  | b                | b <sup>++</sup> | b*               | b <sup>*++</sup> | b <sup>0</sup>   | b <sup>0++</sup> | Seq.     | y                | y <sup>++</sup> | y*              | y <sup>*++</sup> | y <sup>0</sup>   | y <sup>0++</sup> | #         |
|----|------------------|-----------------|------------------|------------------|------------------|------------------|----------|------------------|-----------------|-----------------|------------------|------------------|------------------|-----------|
| 1  | 157.1084         | 79.0578         | 140.0818         | 70.5446          |                  |                  | <b>R</b> |                  |                 |                 |                  |                  |                  | <b>13</b> |
| 2  | <b>258.1561</b>  | 129.5817        | 241.1295         | 121.0684         | 240.1455         | 120.5764         | <b>T</b> | 1392.7039        | 696.8556        | 1375.6774       | 688.3423         | <b>1374.6933</b> | 687.8503         | <b>12</b> |
| 3  | <b>405.1915</b>  | 203.0994        | 388.1649         | 194.5861         | 387.1809         | 194.0941         | <b>M</b> | 1291.6562        | <b>646.3318</b> | 1274.6297       | 637.8185         | 1273.6457        | 637.3265         | <b>11</b> |
| 4  | <b>518.2755</b>  | 259.6414        | 501.2490         | 251.1281         | <b>500.2650</b>  | 250.6361         | <b>L</b> | 1144.6208        | 572.8141        | 1127.5943       | 564.3008         | 1126.6103        | 563.8088         | <b>10</b> |
| 5  | <b>589.3126</b>  | 295.1600        | <b>572.2861</b>  | <b>286.6467</b>  | 571.3021         | <b>286.1547</b>  | <b>A</b> | <b>1031.5368</b> | 516.2720        | 1014.5102       | 507.7587         | 1013.5262        | 507.2667         | <b>9</b>  |
| 6  | <b>718.3552</b>  | 359.6813        | 701.3287         | 351.1680         | 700.3447         | 350.6760         | <b>E</b> | 960.4997         | 480.7535        | 943.4731        | <b>472.2402</b>  | 942.4891         | <b>471.7482</b>  | <b>8</b>  |
| 7  | <b>832.3982</b>  | 416.7027        | 815.3716         | 408.1894         | <b>814.3876</b>  | 407.6974         | <b>N</b> | <b>831.4571</b>  | 416.2322        | <b>814.4305</b> | 407.7189         | <b>813.4465</b>  | 407.2269         | <b>7</b>  |
| 8  | 946.4411         | <b>473.7242</b> | <b>929.4145</b>  | 465.2109         | 928.4305         | 464.7189         | <b>N</b> | <b>717.4141</b>  | 359.2107        | 700.3876        | 350.6974         | <b>699.4036</b>  | 350.2054         | <b>6</b>  |
| 9  | 1059.5252        | 530.2662        | 1042.4986        | 521.7529         | 1041.5146        | 521.2609         | <b>L</b> | 603.3712         | 302.1892        | 586.3447        | 293.6760         | 585.3606         | 293.1840         | <b>5</b>  |
| 10 | 1188.5678        | 594.7875        | 1171.5412        | 586.2742         | 1170.5572        | 585.7822         | <b>E</b> | 490.2871         | 245.6472        | <b>473.2606</b> | 237.1339         | <b>472.2766</b>  | 236.6419         | <b>4</b>  |
| 11 | <b>1289.6154</b> | 645.3114        | <b>1272.5889</b> | 636.7981         | <b>1271.6049</b> | 636.3061         | <b>T</b> | 361.2445         | 181.1259        | 344.2180        | 172.6126         | <b>343.2340</b>  | 172.1206         | <b>3</b>  |
| 12 | <b>1402.6995</b> | 701.8534        | <b>1385.6729</b> | 693.3401         | <b>1384.6889</b> | 692.8481         | <b>L</b> | <b>260.1969</b>  | 130.6021        | 243.1703        | 122.0888         |                  |                  | <b>2</b>  |
| 13 |                  |                 |                  |                  |                  |                  | <b>K</b> | 147.1128         | 74.0600         | 130.0863        | 65.5468          |                  |                  | <b>1</b>  |

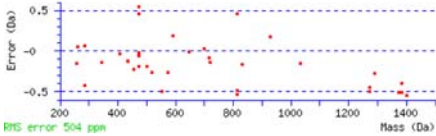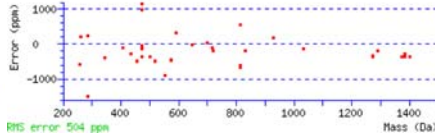

NCBI BLAST search of **RTMLAENNLETLK**

(Parameters: blastp, nr protein database, expect=20000, no filter, PAM30)

Other BLAST [web gateways](#)

All matches to this query

| Score | Mr(calc): | Delta   | Sequence              |
|-------|-----------|---------|-----------------------|
| 67.0  | 1547.7865 | 0.0023  | <b>DAALMVTNDGATLK</b> |
| 31.4  | 1547.7977 | -0.0089 | <b>RTMLAENNLETLK</b>  |

Mascot: <http://www.matrixscience.com/>

**(MATRIX) (SCIENCE) Mascot Search Results**

**Peptide View**

MS/MS Fragmentation of **LPANALLGEENK**

Found in **ACADL\_MOUSE**, Long-chain specific acyl-CoA dehydrogenase, mitochondrial precursor (EC 1.3.99.13) (LCAD) - Mus musculus (Mouse) (P51174)

Match to Query 987: 1267.677224 from(634.845888,2+)

Title: Arrell09050808 scan 1142 1142 (Arrell09050808.1142.1142.2.dta)

Data file Arrell09050808.mgf

Click mouse within plot area to zoom in by factor of two about that point

Or, Plot from 100 to 1200 Da **Full range**

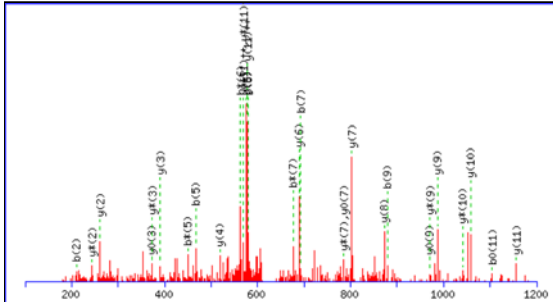

Monoisotopic mass of neutral peptide Mr(calc): 1267.6772

Ions Score: 46 Expect: 0.00016

Matches (Bold Red): 30/106 Fragment ions using 83 most intense peaks

| #  | b               | b <sup>++</sup> | b*              | b <sup>*++</sup> | b <sup>0</sup>   | b <sup>0++</sup> | Seq. | y                | y <sup>++</sup> | y*               | y <sup>*++</sup> | y <sup>0</sup>  | y <sup>0++</sup> | #  |
|----|-----------------|-----------------|-----------------|------------------|------------------|------------------|------|------------------|-----------------|------------------|------------------|-----------------|------------------|----|
| 1  | 114.0913        | 57.5493         |                 |                  |                  |                  | L    |                  |                 |                  |                  |                 |                  | 12 |
| 2  | <b>211.1441</b> | 106.0757        |                 |                  |                  |                  | P    | <b>1155.6004</b> | <b>578.3039</b> | 1138.5739        | <b>569.7906</b>  | 1137.5899       | <b>569.2986</b>  | 11 |
| 3  | 282.1812        | 141.5942        |                 |                  |                  |                  | A    | <b>1058.5477</b> | 529.7775        | <b>1041.5211</b> | 521.2642         | 1040.5371       | 520.7722         | 10 |
| 4  | 396.2241        | 198.6157        | 379.1976        | 190.1024         |                  |                  | N    | <b>987.5106</b>  | 494.2589        | <b>970.4840</b>  | 485.7456         | <b>969.5000</b> | 485.2536         | 9  |
| 5  | <b>467.2613</b> | 234.1343        | <b>450.2347</b> | 225.6210         |                  |                  | A    | <b>873.4676</b>  | 437.2374        | 856.4411         | 428.7242         | 855.4571        | 428.2322         | 8  |
| 6  | <b>580.3453</b> | 290.6763        | <b>563.3188</b> | 282.1630         |                  |                  | L    | <b>802.4305</b>  | 401.7189        | <b>785.4040</b>  | 393.2056         | <b>784.4199</b> | 392.7136         | 7  |
| 7  | <b>693.4294</b> | 347.2183        | <b>676.4028</b> | 338.7051         |                  |                  | L    | <b>689.3464</b>  | 345.1769        | 672.3199         | 336.6636         | 671.3359        | 336.1716         | 6  |
| 8  | 750.4509        | 375.7291        | 733.4243        | 367.2158         |                  |                  | G    | <b>576.2624</b>  | 288.6348        | 559.2358         | 280.1216         | 558.2518        | 279.6295         | 5  |
| 9  | <b>879.4934</b> | 440.2504        | 862.4669        | 431.7371         | 861.4829         | 431.2451         | E    | <b>519.2409</b>  | 260.1241        | 502.2144         | 251.6108         | 501.2304        | 251.1188         | 4  |
| 10 | 1008.5360       | 504.7717        | 991.5095        | 496.2584         | 990.5255         | 495.7664         | E    | <b>390.1983</b>  | 195.6028        | <b>373.1718</b>  | 187.0895         | <b>372.1878</b> | 186.5975         | 3  |
| 11 | 1122.5790       | 561.7931        | 1105.5524       | 553.2798         | <b>1104.5684</b> | 552.7878         | N    | <b>261.1557</b>  | 131.0815        | <b>244.1292</b>  | 122.5682         |                 |                  | 2  |
| 12 |                 |                 |                 |                  |                  |                  | K    | 147.1128         | 74.0600         | 130.0863         | 65.5468          |                 |                  | 1  |

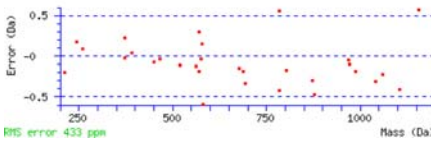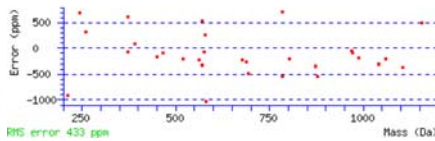

NCBI BLAST search of **LPANALLGEENK**

(Parameters: blastp, nr protein database, expect=20000, no filter, PAM30)

Other BLAST [web gateways](#)

All matches to this query

| Score | Mr(calc): | Delta  | Sequence                     |
|-------|-----------|--------|------------------------------|
| 46.5  | 1267.6772 | 0.0001 | <a href="#">LPANALLGEENK</a> |

Mascot: <http://www.matrixscience.com/>

**(MATRIX) (SCIENCE) Mascot Search Results**

**Peptide View**

MS/MS Fragmentation of **TLNVESNFISGAGILR**  
 Found in **TMOD1\_MOUSE**, Tropomodulin-1 (Erythrocyte tropomodulin) (E-Tmod) - Mus musculus (Mouse) (P49813)

Match to Query 1487: 1689.906834 from(845.960693,2+)  
 Title: Arrell09050808 scan 2102 2102 (Arrell09050808.2102.2102.2.dta)  
 Data file Arrell09050808.mgf

Click mouse within plot area to zoom in by factor of two about that point  
 Or, Plot from 200 to 1700 Da Full range

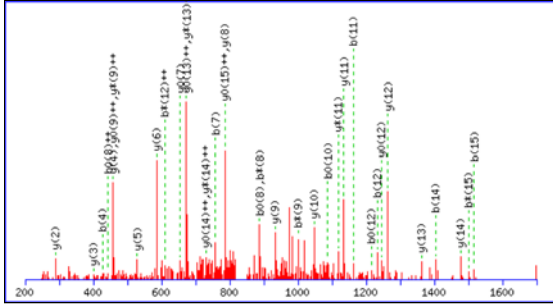

Monoisotopic mass of neutral peptide Mr(calc): 1689.9050  
 Ions Score: 95 Expect: 1.4e-09  
 Matches (Bold Red): 37/164 fragment ions using 56 most intense peaks

| #  | b                | b <sup>++</sup> | b <sup>*</sup>   | b <sup>*++</sup> | b <sup>0</sup>   | b <sup>0++</sup> | Seq.     | y                | y <sup>++</sup> | y <sup>*</sup>   | y <sup>*++</sup> | y <sup>0</sup>   | y <sup>0++</sup> | #         |
|----|------------------|-----------------|------------------|------------------|------------------|------------------|----------|------------------|-----------------|------------------|------------------|------------------|------------------|-----------|
| 1  | 102.0550         | 51.5311         |                  |                  | 84.0444          | 42.5258          | <b>T</b> |                  |                 |                  |                  |                  |                  | <b>16</b> |
| 2  | 215.1390         | 108.0731        |                  |                  | 197.1285         | 99.0679          | <b>L</b> | 1589.8646        | 795.4359        | 1572.8380        | 786.9227         | 1571.8540        | <b>786.4306</b>  | <b>15</b> |
| 3  | 329.1819         | 165.0946        | 312.1554         | 156.5813         | 311.1714         | 156.0893         | <b>N</b> | <b>1476.7805</b> | 738.8939        | 1459.7540        | <b>730.3806</b>  | 1458.7700        | <b>729.8886</b>  | <b>14</b> |
| 4  | <b>428.2504</b>  | 214.6288        | 411.2238         | 206.1155         | 410.2398         | 205.6235         | <b>V</b> | <b>1362.7376</b> | 681.8724        | 1345.7110        | <b>673.3592</b>  | 1344.7270        | <b>672.8672</b>  | <b>13</b> |
| 5  | 557.2930         | 279.1501        | 540.2664         | 270.6368         | 539.2824         | 270.1448         | <b>E</b> | <b>1263.6692</b> | 632.3382        | 1246.6426        | 623.8250         | <b>1245.6586</b> | 623.3329         | <b>12</b> |
| 6  | 644.3250         | 322.6661        | 627.2984         | 314.1529         | 626.3144         | 313.6608         | <b>S</b> | <b>1134.6266</b> | 567.8169        | <b>1117.6000</b> | 559.3037         | 1116.6160        | 558.8116         | <b>11</b> |
| 7  | <b>758.3679</b>  | 379.6876        | 741.3414         | 371.1743         | 740.3573         | 370.6823         | <b>N</b> | <b>1047.5946</b> | 524.3009        | 1030.5680        | 515.7876         | 1029.5840        | 515.2956         | <b>10</b> |
| 8  | 905.4363         | 453.2218        | <b>888.4098</b>  | 444.7085         | <b>887.4258</b>  | <b>444.2165</b>  | <b>F</b> | <b>933.5516</b>  | 467.2795        | 916.5251         | <b>458.7662</b>  | 915.5411         | <b>458.2742</b>  | <b>9</b>  |
| 9  | 1018.5204        | 509.7638        | <b>1001.4938</b> | 501.2506         | 1000.5098        | 500.7585         | <b>I</b> | <b>786.4832</b>  | 393.7452        | 769.4567         | 385.2320         | 768.4726         | 384.7400         | <b>8</b>  |
| 10 | 1105.5524        | 553.2798        | 1088.5259        | 544.7666         | <b>1087.5418</b> | 544.2746         | <b>S</b> | <b>673.3991</b>  | 337.2032        | 656.3726         | 328.6899         | <b>655.3886</b>  | 328.1979         | <b>7</b>  |
| 11 | <b>1162.5739</b> | 581.7906        | 1145.5473        | 573.2773         | 1144.5633        | 572.7853         | <b>G</b> | <b>586.3671</b>  | 293.6872        | 569.3406         | 285.1739         |                  |                  | <b>6</b>  |
| 12 | <b>1233.6110</b> | 617.3091        | 1216.5844        | <b>608.7959</b>  | <b>1215.6004</b> | 608.3039         | <b>A</b> | <b>529.3457</b>  | 265.1765        | 512.3191         | 256.6632         |                  |                  | <b>5</b>  |
| 13 | 1290.6325        | 645.8199        | 1273.6059        | 637.3066         | 1272.6219        | 636.8146         | <b>G</b> | <b>458.3085</b>  | 229.6579        | 441.2820         | 221.1446         |                  |                  | <b>4</b>  |
| 14 | <b>1403.7165</b> | 702.3619        | 1386.6900        | 693.8486         | 1385.7060        | 693.3566         | <b>I</b> | <b>401.2871</b>  | 201.1472        | 384.2605         | 192.6339         |                  |                  | <b>3</b>  |
| 15 | <b>1516.8006</b> | 758.9039        | <b>1499.7740</b> | 750.3907         | 1498.7900        | 749.8986         | <b>L</b> | <b>288.2030</b>  | 144.6051        | 271.1765         | 136.0919         |                  |                  | <b>2</b>  |
| 16 |                  |                 |                  |                  |                  |                  | <b>R</b> | 175.1190         | 88.0631         | 158.0924         | 79.5498          |                  |                  | <b>1</b>  |

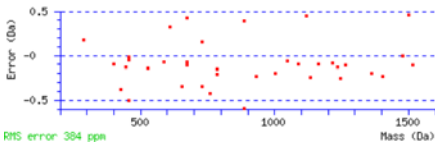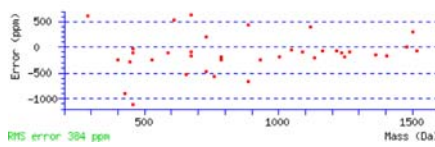

NCBI BLAST search of [TLNVESNFISGAGILR](#)  
 (Parameters: blastp, nr protein database, expect=20000, no filter, PAM30)  
 Other BLAST [web gateways](#)

**All matches to this query**

| Score | Mr(calc): | Delta   | Sequence                         |
|-------|-----------|---------|----------------------------------|
| 94.5  | 1689.9050 | 0.0019  | <a href="#">TLNVESNFISGAGILR</a> |
| 0.7   | 1689.9162 | -0.0094 | <a href="#">AQNNTLIFTKGNTR</a>   |

Mascot: <http://www.matrixscience.com/>

**(MATRIX) (SCIENCE) Mascot Search Results**

**Peptide View**

MS/MS Fragmentation of **LPDGTSLTQTFR**

Found in **SAKS1\_MOUSE**, SAPK substrate protein 1 (UBA/UBX 33.3 kDa protein) (mY33K) (Protein 2B28) - Mus musculus (Mouse) (Q922Y1)

Match to Query 1108: 1334.682104 from(668.348328,2+)

Title: Arrell09050808 scan 1375 1375 (Arrell09050808.1375.1375.2.dta)

Data file Arrell09050808.mgf

Click mouse within plot area to zoom in by factor of two about that point

Or, Plot from 100 to 1400 Da **Full range**

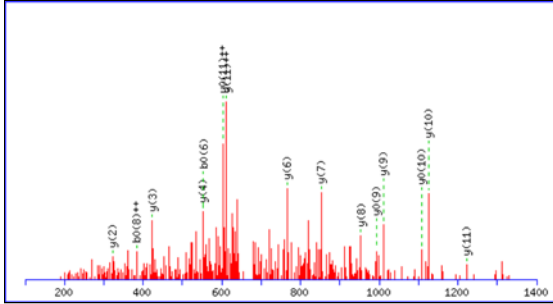

Monoisotopic mass of neutral peptide Mr(calc): 1334.6830

Ions Score: 41 Expect: 0.00072

Matches (Bold Red): 15/108 fragment ions using 45 most intense peaks

| #  | b         | b <sup>++</sup> | b*        | b <sup>*++</sup> | b <sup>0</sup>  | b <sup>0++</sup> | Seq.     | y                | y <sup>++</sup> | y*        | y <sup>*++</sup> | y <sup>0</sup>   | y <sup>0++</sup> | #         |
|----|-----------|-----------------|-----------|------------------|-----------------|------------------|----------|------------------|-----------------|-----------|------------------|------------------|------------------|-----------|
| 1  | 114.0913  | 57.5493         |           |                  |                 |                  | <b>L</b> |                  |                 |           |                  |                  |                  | <b>12</b> |
| 2  | 211.1441  | 106.0757        |           |                  |                 |                  | <b>P</b> | <b>1222.6062</b> | <b>611.8068</b> | 1205.5797 | 603.2935         | 1204.5957        | <b>602.8015</b>  | <b>11</b> |
| 3  | 326.1710  | 163.5892        |           |                  | 308.1605        | 154.5839         | <b>D</b> | <b>1125.5535</b> | 563.2804        | 1108.5269 | 554.7671         | <b>1107.5429</b> | 554.2751         | <b>10</b> |
| 4  | 383.1925  | 192.0999        |           |                  | 365.1819        | 183.0946         | <b>G</b> | <b>1010.5265</b> | 505.7669        | 993.5000  | 497.2536         | <b>992.5160</b>  | 496.7616         | <b>9</b>  |
| 5  | 484.2402  | 242.6237        |           |                  | 466.2296        | 233.6185         | <b>T</b> | <b>953.5051</b>  | 477.2562        | 936.4785  | 468.7429         | 935.4945         | 468.2509         | <b>8</b>  |
| 6  | 571.2722  | 286.1397        |           |                  | <b>553.2617</b> | 277.1345         | <b>S</b> | <b>852.4574</b>  | 426.7323        | 835.4308  | 418.2191         | 834.4468         | 417.7271         | <b>7</b>  |
| 7  | 684.3563  | 342.6818        |           |                  | 666.3457        | 333.6765         | <b>L</b> | <b>765.4254</b>  | 383.2163        | 748.3988  | 374.7030         | 747.4148         | 374.2110         | <b>6</b>  |
| 8  | 785.4040  | 393.2056        |           |                  | 767.3934        | <b>384.2003</b>  | <b>T</b> | 652.3413         | 326.6743        | 635.3148  | 318.1610         | 634.3307         | 317.6690         | <b>5</b>  |
| 9  | 913.4625  | 457.2349        | 896.4360  | 448.7216         | 895.4520        | 448.2296         | <b>Q</b> | <b>551.2936</b>  | 276.1504        | 534.2671  | 267.6372         | 533.2831         | 267.1452         | <b>4</b>  |
| 10 | 1014.5102 | 507.7587        | 997.4837  | 499.2455         | 996.4997        | 498.7535         | <b>T</b> | <b>423.2350</b>  | 212.1212        | 406.2085  | 203.6079         | 405.2245         | 203.1159         | <b>3</b>  |
| 11 | 1161.5786 | 581.2930        | 1144.5521 | 572.7797         | 1143.5681       | 572.2877         | <b>F</b> | <b>322.1874</b>  | 161.5973        | 305.1608  | 153.0840         |                  |                  | <b>2</b>  |
| 12 |           |                 |           |                  |                 |                  | <b>R</b> | 175.1190         | 88.0631         | 158.0924  | 79.5498          |                  |                  | <b>1</b>  |

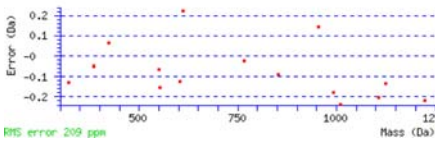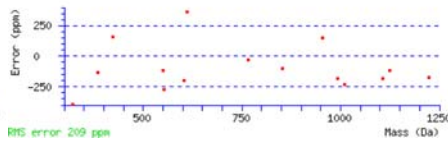

NCBI BLAST search of **LPDGTSLTQTFR**

(Parameters: blastp, nr protein database, expect=20000, no filter, PAM30)

Other BLAST [web gateways](#)

All matches to this query

| Score | Mr(calc): | Delta   | Sequence            |
|-------|-----------|---------|---------------------|
| 41.0  | 1334.6830 | -0.0009 | <b>LPDGTSLTQTFR</b> |

Mascot: <http://www.matrixscience.com/>



**Mascot Search Results**

**Peptide View**

MS/MS Fragmentation of **AVAQGNLSSADVQAAK**

Found in **UQC2\_MOUSE**, Ubiquinol-cytochrome-c reductase complex core protein 2, mitochondrial precursor (EC 1.10.2.2) (Core protein II) (Complex III subunit II) - Mus musculus (Mouse) (Q9DB77)

Match to Query 1344: 1528.784394 from(765.399473,2+)

Title: Arrell09050809 scan 579 579 (Arrell09050809.579.579.2.dta)

Data file Arrell09050809.mgf

Click mouse within plot area to zoom in by factor of two about that point

Or, Plot from 200 to 1500 Da Full range

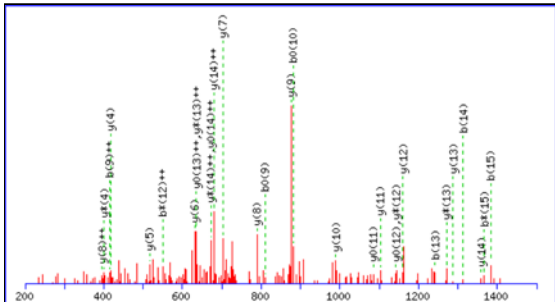

Monoisotopic mass of neutral peptide Mr(calc): 1528.7845

Ions Score: 45 Expect: 0.00025

Matches (Bold Red): 30/150 Fragment ions using 78 most intense peaks

| #  | b                | b <sup>++</sup> | b*               | b* <sup>++</sup> | b <sup>0</sup>  | b <sup>0++</sup> | Seq.     | y                | y <sup>++</sup> | y*               | y* <sup>++</sup> | y <sup>0</sup>   | y <sup>0++</sup> | #         |
|----|------------------|-----------------|------------------|------------------|-----------------|------------------|----------|------------------|-----------------|------------------|------------------|------------------|------------------|-----------|
| 1  | 72.0444          | 36.5258         |                  |                  |                 |                  | <b>A</b> |                  |                 |                  |                  |                  |                  | <b>16</b> |
| 2  | 171.1128         | 86.0600         |                  |                  |                 |                  | <b>V</b> | 1458.7547        | 729.8810        | 1441.7281        | 721.3677         | 1440.7441        | 720.8757         | <b>15</b> |
| 3  | 242.1499         | 121.5786        |                  |                  |                 |                  | <b>A</b> | <b>1359.6863</b> | <b>680.3468</b> | 1342.6597        | <b>671.8335</b>  | 1341.6757        | <b>671.3415</b>  | <b>14</b> |
| 4  | 370.2085         | 185.6079        | 353.1819         | 177.0946         |                 |                  | <b>Q</b> | <b>1288.6492</b> | 644.8282        | <b>1271.6226</b> | <b>636.3149</b>  | 1270.6386        | <b>635.8229</b>  | <b>13</b> |
| 5  | 427.2300         | 214.1186        | 410.2034         | 205.6053         |                 |                  | <b>G</b> | <b>1160.5906</b> | 580.7989        | <b>1143.5640</b> | 572.2857         | <b>1142.5800</b> | 571.7937         | <b>12</b> |
| 6  | 541.2729         | 271.1401        | 524.2463         | 262.6268         |                 |                  | <b>N</b> | <b>1103.5691</b> | 552.2882        | 1086.5426        | 543.7749         | <b>1085.5586</b> | 543.2829         | <b>11</b> |
| 7  | 654.3570         | 327.6821        | 637.3304         | 319.1688         |                 |                  | <b>L</b> | <b>989.5262</b>  | 495.2667        | 972.4997         | 486.7535         | 971.5156         | 486.2615         | <b>10</b> |
| 8  | 741.3890         | 371.1981        | 724.3624         | 362.6849         | 723.3784        | 362.1928         | <b>S</b> | <b>876.4421</b>  | 438.7247        | 859.4156         | 430.2114         | 858.4316         | 429.7194         | <b>9</b>  |
| 9  | 828.4210         | <b>414.7141</b> | 811.3945         | 406.2009         | <b>810.4104</b> | 405.7089         | <b>S</b> | <b>789.4101</b>  | <b>395.2087</b> | 772.3836         | 386.6954         | 771.3995         | 386.2034         | <b>8</b>  |
| 10 | 899.4581         | 450.2327        | 882.4316         | 441.7194         | <b>881.4476</b> | 441.2274         | <b>A</b> | <b>702.3781</b>  | 351.6927        | 685.3515         | 343.1794         | 684.3675         | 342.6874         | <b>7</b>  |
| 11 | 1014.4851        | 507.7462        | 997.4585         | 499.2329         | 996.4745        | 498.7409         | <b>D</b> | <b>631.3410</b>  | 316.1741        | 614.3144         | 307.6608         | 613.3304         | 307.1688         | <b>6</b>  |
| 12 | 1113.5535        | 557.2804        | 1096.5269        | <b>548.7671</b>  | 1095.5429       | 548.2751         | <b>V</b> | <b>516.3140</b>  | 258.6607        | 499.2875         | 250.1474         |                  |                  | <b>5</b>  |
| 13 | <b>1241.6121</b> | 621.3097        | 1224.5855        | 612.7964         | 1223.6015       | 612.3044         | <b>Q</b> | <b>417.2456</b>  | 209.1264        | <b>400.2191</b>  | 200.6132         |                  |                  | <b>4</b>  |
| 14 | <b>1312.6492</b> | 656.8282        | 1295.6226        | 648.3149         | 1294.6386       | 647.8229         | <b>A</b> | 289.1870         | 145.0972        | 272.1605         | 136.5839         |                  |                  | <b>3</b>  |
| 15 | <b>1383.6863</b> | 692.3468        | <b>1366.6597</b> | 683.8335         | 1365.6757       | 683.3415         | <b>A</b> | 218.1499         | 109.5786        | 201.1234         | 101.0653         |                  |                  | <b>2</b>  |
| 16 |                  |                 |                  |                  |                 |                  | <b>K</b> | 147.1128         | 74.0600         | 130.0863         | 65.5468          |                  |                  | <b>1</b>  |

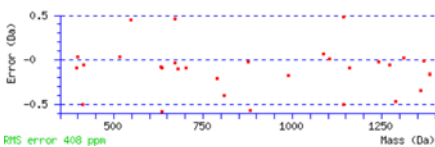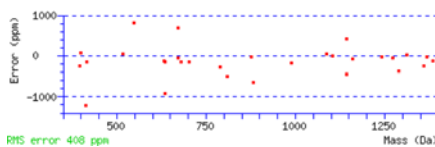

NCBI BLAST search of **AVAQGNLSSADVQAAK**

(Parameters: blastp, nr protein database, expect=20000, no filter, PAM30)

Other BLAST [web gateways](#)

All matches to this query

| Score | Mr(calc): | Delta   | Sequence                |
|-------|-----------|---------|-------------------------|
| 44.8  | 1528.7845 | -0.0001 | <b>AVAQGNLSSADVQAAK</b> |

Mascot: <http://www.matrixscience.com/>
